# Supplementary material for: Differences in the Impact of Economic Structure Evolution on Educational Ecological Carrying Capacity: A Case Study of Guangxi Zhuang Autonomous Region
Source: Preprints.org preprint supplement (doi:10.20944/preprints202409.2109.v1), 2024-09-26
Supplement: Supplementary file 1 [file supplementary]

## Sheet: 所有的数据
	南宁市 Nanning	柳州市 Liuzhou	桂林市 Guilin	梧州市 Wuzhou	北海市 Beihai	防城港市 Fangcheng- gang	钦州市 Qinzhou	贵港市 Guigang	玉林市 Yulin	百色市 Baise	贺州市 Hezhou	河池市 Hechi	来宾市 Laibin	崇左市 Chongzuo		01数据的标准化处理	南宁市 Nanning	柳州市 Liuzhou	桂林市 Guilin	梧州市 Wuzhou	北海市 Beihai	防城港市 Fangcheng- gang	钦州市 Qinzhou	贵港市 Guigang	玉林市 Yulin	百色市 Baise	贺州市 Hezhou	河池市 Hechi	来宾市 Laibin	崇左市 Chongzuo	根据数据的实际情况实现平移，一般加0.0001。如果出现负数，则在最小值的绝对值基础上加0.0001作为平移量	南宁市 Nanning	柳州市 Liuzhou	桂林市 Guilin	梧州市 Wuzhou	北海市 Beihai	防城港市 Fangcheng- gang	钦州市 Qinzhou	贵港市 Guigang	玉林市 Yulin	百色市 Baise	贺州市 Hezhou	河池市 Hechi	来宾市 Laibin	崇左市 Chongzuo		p值	南宁市 Nanning	柳州市 Liuzhou
教育财政性经费X1 2022	15.794	8.258	8.225	5.303	3.786	2.196	6.087	7.065	9.745	8.153	4.075	7.729	4.147	3.594		（无量纲 化处理）	15.7799	8.24387	8.21087	5.28887	3.77187	2.18187	6.07287	7.05087	9.73087	8.13887	4.06087	7.71487	4.13287	3.57987	02选取0.0001 作为平移量	15.78	8.24397	8.21097	5.28897	3.77197	2.18197	6.07297	7.05097	9.73097	8.13897	4.06097	7.71497	4.13297	3.57997	93.9606	Pij值	0.00587663	0.00307014
2021	15.412	8.559	7.979	5.298	3.711	2.138	5.478	6.979	9.481	8.128	3.989	7.11	4.136	3.737		标准化后权重 和熵值是唯一的	15.3979	8.54487	7.96487	5.28387	3.69687	2.12387	5.46387	6.96487	9.46687	8.11387	3.97487	7.09587	4.12187	3.72287		15.398	8.54497	7.96497	5.28397	3.69697	2.12397	5.46397	6.96497	9.46697	8.11397	3.97497	7.09597	4.12197	3.72297	91.9386	Wij值	0.00573437	0.00318224
2020	14.976	8.52	7.659	5.286	3.716	2.06	5.419	7.347	9.589	8.344	3.921	6.989	3.688	3.755			14.9619	8.50587	7.64487	5.27187	3.70187	2.04587	5.40487	7.33287	9.57487	8.32987	3.90687	6.97487	3.67387	3.74087		14.962	8.50597	7.64497	5.27197	3.70197	2.04597	5.40497	7.33297	9.57497	8.32997	3.90697	6.97497	3.67397	3.74097	91.0726	计算 第j项指标下i城市指标值的比重：	0.005572	0.00316772
2019	14.116	7.917	7.657	5.752	3.702	1.987	5.049	6.403	9.41	8.098	3.899	6.528	3.166	3.785			14.1019	7.90287	7.64287	5.73787	3.68787	1.97287	5.03487	6.38887	9.39587	8.08387	3.88487	6.51387	3.15187	3.77087		14.102	7.90297	7.64297	5.73797	3.68797	1.97297	5.03497	6.38897	9.39597	8.08397	3.88497	6.51397	3.15197	3.77097	87.2726	即指标 权重	0.00525173	0.00294315
2018	12.955	7.331	7.28	4.747	3.094	1.587	5.359	6.205	8.71	7.084	3.374	6.071	3.279	3.381			12.9409	7.31687	7.26587	4.73287	3.07987	1.57287	5.34487	6.19087	8.69587	7.06987	3.35987	6.05687	3.26487	3.36687		12.941	7.31697	7.26597	4.73297	3.07997	1.57297	5.34497	6.19097	8.69597	7.06997	3.35997	6.05697	3.26497	3.36697	80.2606	指标权重值越大，	0.00481936	0.00272492
2017	11.714	7.076	7.744	4.971	2.852	1.661	4.992	5.288	8.541	6.994	3.209	6.12	3.115	3.45			11.6999	7.06187	7.72987	4.95687	2.83787	1.64687	4.97787	5.27387	8.52687	6.97987	3.19487	6.10587	3.10087	3.43587		11.7	7.06197	7.72997	4.95697	2.83797	1.64697	4.97797	5.27397	8.52697	6.97997	3.19497	6.10597	3.10097	3.43597	77.5306	表明指标越重要，	0.0043572	0.00262996
2016	9.746	6.806	7.275	4.714	2.899	1.525	4.552	5.684	8.173	6.607	3.231	5.763	3.344	3.425			9.73187	6.79187	7.26087	4.69987	2.88487	1.51087	4.53787	5.66987	8.15887	6.59287	3.21687	5.74887	3.32987	3.41087		9.73197	6.79197	7.26097	4.69997	2.88497	1.51097	4.53797	5.66997	8.15897	6.59297	3.21697	5.74897	3.32997	3.41097	73.5476	对评价 的重要性就越大	0.00362429	0.0025294
2015	9.249	6.697	6.6	4.304	2.495	1.4	4.182	5.094	7.387	6.016	2.941	5.344	2.873	3.399			9.23487	6.68287	6.58587	4.28987	2.48087	1.38587	4.16787	5.07987	7.37287	6.00187	2.92687	5.32987	2.85887	3.38487		9.23497	6.68297	6.58597	4.28997	2.48097	1.38597	4.16797	5.07997	7.37297	6.00197	2.92697	5.32997	2.85897	3.38497	67.7846		0.0034392	0.00248881
2014	7.548	4.544	5.343	3.803	1.968	1.168	3.444	4.334	5.762	4.982	2.415	4.759	2.684	3.192			7.53387	4.52987	5.32887	3.78887	1.95387	1.15387	3.42987	4.31987	5.74787	4.96787	2.40087	4.74487	2.66987	3.17787		7.53397	4.52997	5.32897	3.78897	1.95397	1.15397	3.42997	4.31997	5.74797	4.96797	2.40097	4.74497	2.66997	3.17797	55.7496		0.00280573	0.00168701
2013	7.032	4.204	4.973	3.761	1.699	1.031	3.231	4	5.297	4.731	2.201	4.169	2.711	2.937			7.01787	4.18987	4.95887	3.74687	1.68487	1.01687	3.21687	3.98587	5.28287	4.71687	2.18687	4.15487	2.69687	2.92287		7.01797	4.18997	4.95897	3.74697	1.68497	1.01697	3.21697	3.98597	5.28297	4.71697	2.18697	4.15497	2.69697	2.92297	51.7806		0.00261357	0.00156039
地区生产总值X2 2022	5.218	3.109	2.436	1.42	1.674	0.968	1.917	1.572	2.167	1.729	0.972	1.136	0.901	1.081			5.20387	3.09487	2.42187	1.40587	1.65987	0.953874	1.90287	1.55787	2.15287	1.71487	0.957874	1.12187	0.886874	1.06687		5.20397	3.09497	2.42197	1.40597	1.65997	0.953974	1.90297	1.55797	2.15297	1.71497	0.957974	1.12197	0.886974	1.06697	26.1036		0.00193802	0.0011526
2021	5.121	3.057	2.314	1.369	1.593	0.937	1.648	1.502	2.095	1.569	0.925	1.06	0.886	1.005			5.10687	3.04287	2.29987	1.35487	1.57887	0.922874	1.63387	1.48787	2.08087	1.55487	0.910874	1.04587	0.871874	0.990874		5.10697	3.04297	2.29997	1.35497	1.57897	0.922974	1.63397	1.48797	2.08097	1.55497	0.910974	1.04597	0.871974	0.990974	24.8846		0.00190189	0.00113324
2020	4.726	3.051	2.138	1.088	1.265	0.733	1.387	1.359	1.769	1.338	0.75	0.946	0.723	0.832			4.71187	3.03687	2.12387	1.07387	1.25087	0.718874	1.37287	1.34487	1.75487	1.32387	0.735874	0.931874	0.708874	0.817874		4.71197	3.03697	2.12397	1.07397	1.25097	0.718974	1.37297	1.34497	1.75497	1.32397	0.735974	0.931974	0.708974	0.817974	21.9086		0.00175479	0.001131
2019	4.507	3.127	2.106	0.991	1.301	0.701	1.356	1.258	1.68	1.258	0.7	0.878	0.654	0.757			4.49287	3.11287	2.09187	0.976874	1.28687	0.686874	1.34187	1.24387	1.66587	1.24387	0.685874	0.863874	0.639874	0.742874		4.49297	3.11297	2.09197	0.976974	1.28697	0.686974	1.34197	1.24397	1.66597	1.24397	0.685974	0.863974	0.639974	0.742974	21.0776		0.00167323	0.0011593
2018	4.162	3.008	1.901	0.932	1.187	0.662	1.214	1.116	1.504	1.124	0.61	0.805	0.615	0.693			4.14787	2.99387	1.88687	0.917874	1.17287	0.647874	1.19987	1.10187	1.48987	1.10987	0.595874	0.790874	0.600874	0.678874		4.14797	2.99397	1.88697	0.917974	1.17297	0.647974	1.19997	1.10197	1.48997	1.10997	0.595974	0.790974	0.600974	0.678974	19.3366		0.00154475	0.00111499
2017	3.804	2.687	1.746	0.879	1.046	0.622	1.092	0.976	1.383	1.033	0.55	0.741	0.565	0.632			3.78987	2.67287	1.73187	0.864874	1.03187	0.607874	1.07787	0.961874	1.36887	1.01887	0.535874	0.726874	0.550874	0.617874		3.78997	2.67297	1.73197	0.864974	1.03197	0.607974	1.07797	0.961974	1.36897	1.01897	0.535974	0.726974	0.550974	0.617974	17.5596		0.00141143	0.000995444
2016	3.406	2.421	1.642	0.825	0.979	0.556	0.957	0.881	1.274	0.948	0.503	0.657	0.512	0.545			3.39187	2.40687	1.62787	0.810874	0.964874	0.541874	0.942874	0.866874	1.25987	0.933874	0.488874	0.642874	0.497874	0.530874		3.39197	2.40697	1.62797	0.810974	0.964974	0.541974	0.942974	0.866974	1.25997	0.933974	0.488974	0.642974	0.497974	0.530974	15.9096		0.00126321	0.000896383
2015	3.148	2.253	1.486	0.75	0.851	0.505	0.885	0.8	1.185	0.815	0.452	0.622	0.479	0.492			3.13387	2.23887	1.47187	0.735874	0.836874	0.490874	0.870874	0.785874	1.17087	0.800874	0.437874	0.607874	0.464874	0.477874		3.13397	2.23897	1.47197	0.735974	0.836974	0.490974	0.870974	0.785974	1.17097	0.800974	0.437974	0.607974	0.464974	0.477974	14.5266		0.00116713	0.000833818
2014	2.862	2.117	1.358	0.676	0.827	0.465	0.784	0.733	1.099	0.735	0.426	0.587	0.47	0.46			2.84787	2.10287	1.34387	0.661874	0.812874	0.450874	0.769874	0.718874	1.08487	0.720874	0.411874	0.572874	0.455874	0.445874		2.84797	2.10297	1.34397	0.661974	0.812974	0.450974	0.769974	0.718974	1.08497	0.720974	0.411974	0.572974	0.455974	0.445974	13.4026		0.00106062	0.00078317
2013	2.62	1.928	1.26	0.63	0.717	0.439	0.682	0.695	1.013	0.68	0.406	0.519	0.451	0.431			2.60587	1.91387	1.24587	0.615874	0.702874	0.424874	0.667874	0.680874	0.998874	0.665874	0.391874	0.504874	0.436874	0.416874		2.60597	1.91397	1.24597	0.615974	0.702974	0.424974	0.667974	0.680974	0.998974	0.665974	0.391974	0.504974	0.436974	0.416974	12.2746		0.000970493	0.000712784
人均生产总值X3 2022	6.4418	7.8026	4.5006	4.0012	9.1297	9.4613	4.5595	2.782	2.9134	4.0914	3.896	2.6242	3.3657	4.3118			6.42767	7.78847	4.48647	3.98707	9.11557	9.44717	4.54537	2.76787	2.89927	4.07727	3.88187	2.61007	3.35157	4.29767		6.42777	7.78857	4.48657	3.98717	9.11567	9.44727	4.54547	2.76797	2.89937	4.07737	3.88197	2.61017	3.35167	4.29777	69.6848		0.00239377	0.00290055
2021	6.3937	7.7049	4.2734	3.8608	8.717	9.1918	3.9284	2.6496	2.8203	3.7102	3.7099	2.4467	3.2983	3.9959			6.37957	7.69077	4.25927	3.84667	8.70287	9.17767	3.91427	2.63547	2.80617	3.69607	3.69577	2.43257	3.28417	3.98177		6.37967	7.69087	4.25937	3.84677	8.70297	9.17777	3.91437	2.63557	2.80627	3.69617	3.69587	2.43267	3.28427	3.98187	66.5045		0.00237586	0.00286416
2020	5.9723	7.7269	3.9468	3.0698	6.9662	7.236	3.32	2.3985	2.3867	3.1639	3.0131	2.1804	2.6824	3.2996			5.95817	7.71277	3.93267	3.05567	6.95207	7.22187	3.30587	2.38437	2.37257	3.14977	2.99897	2.16627	2.66827	3.28547		5.95827	7.71287	3.93277	3.05577	6.95217	7.22197	3.30597	2.38447	2.37267	3.14987	2.99907	2.16637	2.66837	3.28557	57.1662		0.00221893	0.00287236
2019	5.7631	7.9458	3.8949	2.8061	7.2182	6.9865	3.2473	2.2274	2.2793	2.9757	2.8277	2.0242	2.4247	3.002			5.74897	7.93167	3.88077	2.79197	7.20407	6.97237	3.23317	2.21327	2.26517	2.96157	2.81357	2.01007	2.41057	2.98787		5.74907	7.93177	3.88087	2.79207	7.20417	6.97247	3.23327	2.21337	2.26527	2.96167	2.81367	2.01017	2.41067	2.98797	55.4265		0.00214102	0.00295388
2018	5.3999	7.7043	3.5327	2.6492	6.6599	6.6662	2.9235	1.9874	2.052	2.671	2.4799	1.8594	2.2847	2.7536			5.38577	7.69017	3.51857	2.63507	6.64577	6.65207	2.90937	1.97327	2.03787	2.65687	2.46577	1.84527	2.27057	2.73947		5.38587	7.69027	3.51867	2.63517	6.64587	6.65217	2.90947	1.97337	2.03797	2.65697	2.46587	1.84537	2.27067	2.73957	51.4273		0.00200576	0.00286394
2017	5.0264	6.9505	3.2688	2.5168	5.9648	6.3653	2.6574	1.7554	1.9102	2.4726	2.2579	1.7248	2.1071	2.527			5.01227	6.93637	3.25467	2.50267	5.95067	6.35117	2.64327	1.74127	1.89607	2.45847	2.24377	1.71067	2.09297	2.51287		5.01237	6.93647	3.25477	2.50277	5.95077	6.35127	2.64337	1.74137	1.89617	2.45857	2.24387	1.71077	2.09307	2.51297	47.3086		0.00186666	0.00258322
2016	4.5308	6.2771	3.0751	2.3741	5.6141	5.717	2.34	1.587	1.7759	2.2713	2.0722	1.5335	1.9047	2.1739			4.51667	6.26297	3.06097	2.35997	5.59997	5.70287	2.32587	1.57287	1.76177	2.25717	2.05807	1.51937	1.89057	2.15977		4.51677	6.26307	3.06107	2.36007	5.60007	5.70297	2.32597	1.57297	1.76187	2.25727	2.05817	1.51947	1.89067	2.15987	43.0503		0.0016821	0.00233244
2015	4.2526	5.9051	2.8085	2.181	4.9495	5.2769	2.1906	1.457	1.6675	1.9714	1.885	1.4661	1.8003	1.9785			4.23847	5.89097	2.79437	2.16687	4.93537	5.26277	2.17647	1.44287	1.65337	1.95727	1.87087	1.45197	1.78617	1.96437		4.23857	5.89107	2.79447	2.16697	4.93547	5.26287	2.17657	1.44297	1.65347	1.95737	1.87097	1.45207	1.78627	1.96447	39.5936		0.00157849	0.0021939
2014	3.9228	5.6024	2.5786	1.9861	4.887	4.9375	1.9494	1.35	1.5522	1.7833	1.789	1.3986	1.7651	1.8539			3.90867	5.58827	2.56447	1.97197	4.87287	4.92337	1.93527	1.33587	1.53807	1.76917	1.77487	1.38447	1.75097	1.83977		3.90877	5.58837	2.56457	1.97207	4.87297	4.92347	1.93537	1.33597	1.53817	1.76927	1.77497	1.38457	1.75107	1.83987	37.1595		0.00145567	0.00208117
2013	3.6168	5.179	2.4151	1.8746	4.2347	4.7143	1.7195	1.2913	1.445	1.6529	1.7388	1.2553	1.7115	1.747			3.60267	5.16487	2.40097	1.86047	4.22057	4.70017	1.70537	1.27717	1.43087	1.63877	1.72467	1.24117	1.69737	1.73287		3.60277	5.16497	2.40107	1.86057	4.22067	4.70027	1.70547	1.27727	1.43097	1.63887	1.72477	1.24127	1.69747	1.73297	34.3994		0.00134171	0.00192349
城镇居民人均可支配收入X4 2022	4.264	4.248	4.204	3.852	4.17	4.047	4.109	3.775	4.156	3.772	3.806	3.452	4.002	3.817			4.24987	4.23387	4.18987	3.83787	4.15587	4.03287	4.09487	3.76087	4.14187	3.75787	3.79187	3.43787	3.98787	3.80287		4.24997	4.23397	4.18997	3.83797	4.15597	4.03297	4.09497	3.76097	4.14197	3.75797	3.79197	3.43797	3.98797	3.80297	55.4776		0.00158274	0.00157678
2021	4.139	4.144	4.074	3.719	4.073	3.968	4.017	3.676	4.031	3.638	3.667	3.335	3.871	3.695			4.12487	4.12987	4.05987	3.70487	4.05887	3.95387	4.00287	3.66187	4.01687	3.62387	3.65287	3.32087	3.85687	3.68087		4.12497	4.12997	4.05997	3.70497	4.05897	3.95397	4.00297	3.66197	4.01697	3.62397	3.65297	3.32097	3.85697	3.68097	53.8506		0.00153618	0.00153805
2020	3.854	3.848	3.815	3.459	3.796	3.719	3.713	3.4	3.736	3.396	3.408	3.088	3.617	3.456			3.83987	3.83387	3.80087	3.44487	3.78187	3.70487	3.69887	3.38587	3.72187	3.38187	3.39387	3.07387	3.60287	3.44187		3.83997	3.83397	3.80097	3.44497	3.78197	3.70497	3.69897	3.38597	3.72197	3.38197	3.39397	3.07397	3.60297	3.44197	50.1086		0.00143005	0.00142781
2019	3.768	3.736	3.718	3.352	3.66	3.639	3.573	3.292	3.613	3.278	3.318	2.967	3.495	3.33			3.75387	3.72187	3.70387	3.33787	3.64587	3.62487	3.55887	3.27787	3.59887	3.26387	3.30387	2.95287	3.48087	3.31587		3.75397	3.72197	3.70397	3.33797	3.64597	3.62497	3.55897	3.27797	3.59897	3.26397	3.30397	2.95297	3.48097	3.31597	48.5426		0.00139802	0.0013861
2018	3.528	3.485	3.465	3.121	3.433	3.433	3.349	3.051	3.396	3.061	3.086	2.747	3.291	3.092			3.51387	3.47087	3.45087	3.10687	3.41887	3.41887	3.33487	3.03687	3.38187	3.04687	3.07187	2.73287	3.27687	3.07787		3.51397	3.47097	3.45097	3.10697	3.41897	3.41897	3.33497	3.03697	3.38197	3.04697	3.07197	2.73297	3.27697	3.07797	45.3416		0.00130864	0.00129263
2017	3.322	3.266	3.253	2.936	3.191	3.208	3.142	2.881	3.216	2.913	2.89	2.565	3.105	2.881			3.30787	3.25187	3.23887	2.92187	3.17687	3.19387	3.12787	2.86687	3.20187	2.89887	2.87587	2.55087	3.09087	2.86687		3.30797	3.25197	3.23897	2.92197	3.17697	3.19397	3.12797	2.86697	3.20197	2.89897	2.87597	2.55097	3.09097	2.86697	42.5726		0.00123193	0.00121107
2016	3.073	3.027	3.012	2.726	2.941	2.976	2.936	2.677	3.008	2.692	2.688	2.366	2.896	2.661			3.05887	3.01287	2.99787	2.71187	2.92687	2.96187	2.92187	2.66287	2.99387	2.67787	2.67387	2.35187	2.88187	2.64687		3.05897	3.01297	2.99797	2.71197	2.92697	2.96197	2.92197	2.66297	2.99397	2.67797	2.67397	2.35197	2.88197	2.64697	39.4826		0.00113919	0.00112206
2015	2.911	2.818	2.81	2.555	2.751	2.758	2.728	2.489	2.884	2.496	2.522	2.224	2.707	2.463			2.89687	2.80387	2.79587	2.54087	2.73687	2.74387	2.71387	2.47487	2.86987	2.48187	2.50787	2.20987	2.69287	2.44887		2.89697	2.80397	2.79597	2.54097	2.73697	2.74397	2.71397	2.47497	2.86997	2.48197	2.50797	2.20997	2.69297	2.44897	36.9196		0.00107886	0.00104423
2014	2.654	2.619	2.619	2.427	2.562	2.573	2.543	2.325	2.668	2.336	2.361	2.088	2.539	2.126			2.63987	2.60487	2.60487	2.41287	2.54787	2.55887	2.52887	2.31087	2.65387	2.32187	2.34687	2.07387	2.52487	2.11187		2.63997	2.60497	2.60497	2.41297	2.54797	2.55897	2.52897	2.31097	2.65397	2.32197	2.34697	2.07397	2.52497	2.11197	34.2436		0.000983155	0.00097012
2013	2.433	2.436	2.455	2.254	2.341	2.369	2.37	2.136	2.437	2.153	2.17	1.965	2.355	1.935			2.41887	2.42187	2.44087	2.23987	2.32687	2.35487	2.35587	2.12187	2.42287	2.13887	2.15587	1.95087	2.34087	1.92087		2.41897	2.42197	2.44097	2.23997	2.32697	2.35497	2.35597	2.12197	2.42297	2.13897	2.15597	1.95097	2.34097	1.92097	31.6126		0.000900852	0.000901969
城镇居民人均生活消费性支出X5 2022	2.063	2.492	2.226	2.464	2.374	2.582	2.084	2.283	2.27	1.969	2.015	2.021	2.081	2.109			2.04887	2.47787	2.21187	2.44987	2.35987	2.56787	2.06987	2.26887	2.25587	1.95487	2.00087	2.00687	2.06687	2.09487		2.04897	2.47797	2.21197	2.44997	2.35997	2.56797	2.06997	2.26897	2.25597	1.95497	2.00097	2.00697	2.06697	2.09497	30.8366		0.00076306	0.000922824
2021	2.058	2.467	2.334	2.399	2.322	2.547	2.151	2.265	2.244	2.019	1.995	2.047	2.053	2.146			2.04387	2.45287	2.31987	2.38487	2.30787	2.53287	2.13687	2.25087	2.22987	2.00487	1.98087	2.03287	2.03887	2.13187		2.04397	2.45297	2.31997	2.38497	2.30797	2.53297	2.13697	2.25097	2.22997	2.00497	1.98097	2.03297	2.03897	2.13197	30.8506		0.000761198	0.000913514
2020	1.924	2.325	2.151	2.287	2.233	2.407	2.054	2.029	2.095	1.93	1.799	1.904	1.953	1.976			1.90987	2.31087	2.13687	2.27287	2.21887	2.39287	2.03987	2.01487	2.08087	1.91587	1.78487	1.88987	1.93887	1.96187		1.90997	2.31097	2.13697	2.27297	2.21897	2.39297	2.03997	2.01497	2.08097	1.91597	1.78497	1.88997	1.93897	1.96197	28.8706		0.000711295	0.000860632
2019	2.014	2.402	2.245	2.36	2.288	2.482	2.09	2.103	2.154	1.998	1.874	1.959	2.02	2.029			1.99987	2.38787	2.23087	2.34587	2.27387	2.46787	2.07587	2.08887	2.13987	1.98387	1.85987	1.94487	2.00587	2.01487		1.99997	2.38797	2.23097	2.34597	2.27397	2.46797	2.07597	2.08897	2.13997	1.98397	1.85997	1.94497	2.00597	2.01497	29.8216		0.000744812	0.000889307
2018	1.872	2.242	2.047	2.122	2.115	2.275	1.951	1.933	1.96	1.901	1.756	1.83	1.933	1.881			1.85787	2.22787	2.03287	2.10787	2.10087	2.26087	1.93687	1.91887	1.94587	1.88687	1.74187	1.81587	1.91887	1.86687		1.85797	2.22797	2.03297	2.10797	2.10097	2.26097	1.93697	1.91897	1.94597	1.88697	1.74197	1.81597	1.91897	1.86697	27.6216		0.000691929	0.000829721
2017	1.728	2.091	1.901	1.902	2.024	2.054	1.839	1.779	1.831	1.799	1.634	1.678	1.862	1.745			1.71387	2.07687	1.88687	1.88787	2.00987	2.03987	1.82487	1.76487	1.81687	1.78487	1.61987	1.66387	1.84787	1.73087		1.71397	2.07697	1.88697	1.88797	2.00997	2.03997	1.82497	1.76497	1.81697	1.78497	1.61997	1.66397	1.84797	1.73097	25.6706		0.000638302	0.000773487
2016	1.589	1.936	1.765	1.797	1.886	1.871	1.717	1.6	1.721	1.649	1.521	1.571	1.739	1.595			1.57487	1.92187	1.75087	1.78287	1.87187	1.85687	1.70287	1.58587	1.70687	1.63487	1.50687	1.55687	1.72487	1.58087		1.57497	1.92197	1.75097	1.78297	1.87197	1.85697	1.70297	1.58597	1.70697	1.63497	1.50697	1.55697	1.72497	1.58097	23.7606		0.000586537	0.000715764
2015	1.39	1.831	1.8	1.678	1.695	1.715	1.645	1.665	1.73	1.553	1.432	1.487	1.676	1.403			1.37587	1.81687	1.78587	1.66387	1.68087	1.70087	1.63087	1.65087	1.71587	1.53887	1.41787	1.47287	1.66187	1.38887		1.37597	1.81697	1.78597	1.66397	1.68097	1.70097	1.63097	1.65097	1.71597	1.53897	1.41797	1.47297	1.66197	1.38897	22.5036		0.000512427	0.000676661
2014	1.266	1.697	1.693	1.59	1.505	1.579	1.532	1.578	1.6	1.447	1.349	1.42	1.565	1.322			1.25187	1.68287	1.67887	1.57587	1.49087	1.56487	1.51787	1.56387	1.58587	1.43287	1.33487	1.40587	1.55087	1.30787		1.25197	1.68297	1.67897	1.57597	1.49097	1.56497	1.51797	1.56397	1.58597	1.43297	1.33497	1.40597	1.55097	1.30797	20.9466		0.000466249	0.000626758
2013	1.139	1.54	1.556	1.475	1.519	1.453	1.436	1.465	1.494	1.345	1.264	1.202	1.468	1.238			1.12487	1.52587	1.54187	1.46087	1.50487	1.43887	1.42187	1.45087	1.47987	1.33087	1.24987	1.18787	1.45387	1.22387		1.12497	1.52597	1.54197	1.46097	1.50497	1.43897	1.42197	1.45097	1.47997	1.33097	1.24997	1.18797	1.45397	1.22397	19.3976		0.000418952	0.000568289
公共财政预算收入X6 2022	3.927	1.512	1.254	0.757	0.677	0.441	0.771	0.7	0.765	1.015	0.488	0.58	0.506	0.396			3.91287	1.49787	1.23987	0.742874	0.662874	0.426874	0.756874	0.685874	0.750874	1.00087	0.473874	0.565874	0.491874	0.381874		3.91297	1.49797	1.23997	0.742974	0.662974	0.426974	0.756974	0.685974	0.750974	1.00097	0.473974	0.565974	0.491974	0.381974	13.5926		0.00145723	0.000557862
2021	3.918	1.75	1.175	0.789	0.721	0.509	0.723	0.857	0.796	1.03	0.484	0.564	0.468	0.399			3.90387	1.73587	1.16087	0.774874	0.706874	0.494874	0.708874	0.842874	0.781874	1.01587	0.469874	0.549874	0.453874	0.384874		3.90397	1.73597	1.16097	0.774974	0.706974	0.494974	0.708974	0.842974	0.781974	1.01597	0.469974	0.549974	0.453974	0.384974	13.9866		0.00145388	0.000646495
2020	3.723	1.731	1.115	0.76	0.794	0.537	0.65	0.753	1.018	0.945	0.409	0.508	0.394	0.338			3.70887	1.71687	1.10087	0.745874	0.779874	0.522874	0.635874	0.738874	1.00387	0.930874	0.394874	0.493874	0.379874	0.323874		3.70897	1.71697	1.10097	0.745974	0.779974	0.522974	0.635974	0.738974	1.00397	0.930974	0.394974	0.493974	0.379974	0.323974	13.4786		0.00138126	0.00063942
2019	3.709	2.215	1.528	0.846	0.781	0.474	0.574	0.627	1.111	0.94	0.362	0.46	0.344	0.337			3.69487	2.20087	1.51387	0.831874	0.766874	0.459874	0.559874	0.612874	1.09687	0.925874	0.347874	0.445874	0.329874	0.322874		3.69497	2.20097	1.51397	0.831974	0.766974	0.459974	0.559974	0.612974	1.09697	0.925974	0.347974	0.445974	0.329974	0.322974	14.1116		0.00137605	0.000819666
2018	3.59	1.938	1.509	0.8	0.717	0.44	0.541	0.572	1.061	0.847	0.325	0.399	0.278	0.311			3.57587	1.92387	1.49487	0.785874	0.702874	0.425874	0.526874	0.557874	1.04687	0.832874	0.310874	0.384874	0.263874	0.296874		3.57597	1.92397	1.49497	0.785974	0.702974	0.425974	0.526974	0.557974	1.04697	0.832974	0.310974	0.384974	0.263974	0.296974	13.1316		0.00133173	0.000716509
2017	3.322	1.798	1.442	0.846	0.643	0.476	0.528	0.504	1.056	0.825	0.309	0.362	0.276	0.341			3.30787	1.78387	1.42787	0.831874	0.628874	0.461874	0.513874	0.489874	1.04187	0.810874	0.294874	0.347874	0.261874	0.326874		3.30797	1.78397	1.42797	0.831974	0.628974	0.461974	0.513974	0.489974	1.04197	0.810974	0.294974	0.347974	0.261974	0.326974	12.5316		0.00123193	0.000664371
2016	3.128	1.592	1.453	0.956	0.501	0.557	0.495	0.476	1.048	0.795	0.324	0.334	0.303	0.408			3.11387	1.57787	1.43887	0.941874	0.486874	0.542874	0.480874	0.461874	1.03387	0.780874	0.309874	0.319874	0.288874	0.393874		3.11397	1.57797	1.43897	0.941974	0.486974	0.542974	0.480974	0.461974	1.03397	0.780974	0.309974	0.319974	0.288974	0.393974	12.1736		0.00115968	0.000587654
2015	2.971	1.467	1.345	0.924	0.476	0.521	0.503	0.426	0.972	0.73	0.29	0.315	0.303	0.501			2.95687	1.45287	1.33087	0.909874	0.461874	0.506874	0.488874	0.411874	0.957874	0.715874	0.275874	0.300874	0.288874	0.486874		2.95697	1.45297	1.33097	0.909974	0.461974	0.506974	0.488974	0.411974	0.957974	0.715974	0.275974	0.300974	0.288974	0.486974	11.5476		0.00110121	0.000541103
2014	2.749	1.332	1.239	0.905	0.473	0.455	0.476	0.365	0.888	0.709	0.244	0.299	0.38	0.484			2.73487	1.31787	1.22487	0.890874	0.458874	0.440874	0.461874	0.350874	0.873874	0.694874	0.229874	0.284874	0.365874	0.469874		2.73497	1.31797	1.22497	0.890974	0.458974	0.440974	0.461974	0.350974	0.873974	0.694974	0.229974	0.284974	0.365974	0.469974	10.8016		0.00101853	0.000490828
2013	2.563	1.251	1.11	0.857	0.421	0.407	0.45	0.312	0.755	0.657	0.22	0.27	0.364	0.475			2.54887	1.23687	1.09587	0.842874	0.406874	0.392874	0.435874	0.297874	0.740874	0.642874	0.205874	0.255874	0.349874	0.460874		2.54897	1.23697	1.09597	0.842974	0.406974	0.392974	0.435974	0.297974	0.740974	0.642974	0.205974	0.255974	0.349974	0.460974	9.91563		0.000949265	0.000460662
公共财政预算支出X7 2022	8.389	3.631	4.647	2.545	1.903	1.503	2.601	3.068	3.658	4.614	2.193	4.128	2.294	2.461			8.37487	3.61687	4.63287	2.53087	1.88887	1.48887	2.58687	3.05387	3.64387	4.59987	2.17887	4.11387	2.27987	2.44687		8.37497	3.61697	4.63297	2.53097	1.88897	1.48897	2.58697	3.05397	3.64397	4.59997	2.17897	4.11397	2.27997	2.44697	47.4386		0.00311893	0.001347
2021	7.754	4.24	4.618	2.591	1.792	1.43	2.461	2.928	3.759	4.306	2.191	3.729	2.342	2.601			7.73987	4.22587	4.60387	2.57687	1.77787	1.41587	2.44687	2.91387	3.74487	4.29187	2.17687	3.71487	2.32787	2.58687		7.73997	4.22597	4.60397	2.57697	1.77797	1.41597	2.44697	2.91397	3.74497	4.29197	2.17697	3.71497	2.32797	2.58697	46.5456		0.00288245	0.0015738
2020	8.228	4.696	4.721	2.881	2.127	1.552	2.376	3.065	4.232	5.048	2.304	4.52	2.219	2.758			8.21387	4.68187	4.70687	2.86687	2.11287	1.53787	2.36187	3.05087	4.21787	5.03387	2.28987	4.50587	2.20487	2.74387		8.21397	4.68197	4.70697	2.86697	2.11297	1.53797	2.36197	3.05097	4.21797	5.03397	2.28997	4.50597	2.20497	2.74397	50.5306		0.00305897	0.00174362
2019	7.892	4.989	4.957	2.937	2.005	1.395	2.251	2.93	4.19	4.787	2.201	3.903	1.894	2.901			7.87787	4.97487	4.94287	2.92287	1.99087	1.38087	2.23687	2.91587	4.17587	4.77287	2.18687	3.88887	1.87987	2.88687		7.87797	4.97497	4.94297	2.92297	1.99097	1.38097	2.23697	2.91597	4.17597	4.77297	2.18697	3.88897	1.87997	2.88697	49.0356		0.00293384	0.00185273
2018	6.98	4.244	4.559	2.616	1.755	1.273	2.221	2.638	3.68	3.937	1.928	3.522	1.838	2.575			6.96587	4.22987	4.54487	2.60187	1.74087	1.25887	2.20687	2.62387	3.66587	3.92287	1.91387	3.50787	1.82387	2.56087		6.96597	4.22997	4.54497	2.60197	1.74097	1.25897	2.20697	2.62397	3.66597	3.92297	1.91397	3.50797	1.82397	2.56097	43.5696		0.0025942	0.00157529
2017	6.463	3.746	4.347	2.423	1.575	1.205	2.059	2.338	3.516	3.797	1.816	3.289	1.782	2.216			6.44887	3.73187	4.33287	2.40887	1.56087	1.19087	2.04487	2.32387	3.50187	3.78287	1.80187	3.27487	1.76787	2.20187		6.44897	3.73197	4.33297	2.40897	1.56097	1.19097	2.04497	2.32397	3.50197	3.78297	1.80197	3.27497	1.76797	2.20197	40.3756		0.00240167	0.00138983
2016	5.87	3.396	3.99	2.28	1.501	1.276	2.001	2.126	3.176	3.412	1.612	2.898	1.595	2.029			5.85587	3.38187	3.97587	2.26587	1.48687	1.26187	1.98687	2.11187	3.16187	3.39787	1.59787	2.88387	1.58087	2.01487		5.85597	3.38197	3.97597	2.26597	1.48697	1.26197	1.98697	2.11197	3.16197	3.39797	1.59797	2.88397	1.58097	2.01497	36.9656		0.00218083	0.00125948
2015	5.267	3.097	3.56	2.147	1.318	1.317	1.925	1.864	2.858	3.102	1.542	2.591	1.393	1.851			5.25287	3.08287	3.54587	2.13287	1.30387	1.30287	1.91087	1.84987	2.84387	3.08787	1.52787	2.57687	1.37887	1.83687		5.25297	3.08297	3.54597	2.13297	1.30397	1.30297	1.91097	1.84997	2.84397	3.08797	1.52797	2.57697	1.37897	1.83697	33.6356		0.00195626	0.00114813
2014	4.658	2.616	3.044	1.841	1.05	0.975	1.413	1.471	2.291	2.649	1.183	2.262	1.293	1.555			4.64387	2.60187	3.02987	1.82687	1.03587	0.960874	1.39887	1.45687	2.27687	2.63487	1.16887	2.24787	1.27887	1.54087		4.64397	2.60197	3.02997	1.82697	1.03597	0.960974	1.39897	1.45697	2.27697	2.63497	1.16897	2.24797	1.27897	1.54097	28.1046		0.00172947	0.000969003
2013	4.173	2.406	2.866	1.76	0.995	0.885	1.343	1.405	2.037	2.326	1.073	1.98	1.236	1.409			4.15887	2.39187	2.85187	1.74587	0.980874	0.870874	1.32887	1.39087	2.02287	2.31187	1.05887	1.96587	1.22187	1.39487		4.15897	2.39197	2.85197	1.74597	0.980974	0.870974	1.32897	1.39097	2.02297	2.31197	1.05897	1.96597	1.22197	1.39497	25.6976		0.00154885	0.000890797
																																														2685.21
人口数X8 2022	8.101	3.985	5.412	3.548	1.834	1.023	4.204	5.651	7.44	4.226	2.495	4.327	2.678	2.507			0.265842	0.354377	0.323683	0.363777	0.400645	0.41809	0.349667	0.318542	0.28006	0.349193	0.386427	0.347021	0.382491	0.386169		0.265942	0.354477	0.323783	0.363877	0.400745	0.41819	0.349767	0.318642	0.28016	0.349293	0.386527	0.347121	0.382591	0.386269	4.92738		0.00136138	0.0018146
2021	8.009	3.968	5.416	3.547	1.827	1.019	4.195	5.668	7.428	4.228	2.493	4.333	2.685	2.514			0.267821	0.354743	0.323596	0.363799	0.400796	0.418176	0.34986	0.318176	0.280318	0.34915	0.38647	0.346892	0.38234	0.386018		0.267921	0.354843	0.323696	0.363899	0.400896	0.418276	0.34996	0.318276	0.280418	0.34925	0.38657	0.346992	0.38244	0.386118	4.92956		0.00137151	0.00181647
2020	7.914	3.949	5.417	3.545	1.816	1.013	4.179	5.665	7.412	4.23	2.489	4.338	2.694	2.522			0.269864	0.355152	0.323575	0.363842	0.401032	0.418305	0.350204	0.31824	0.280663	0.349107	0.386556	0.346784	0.382147	0.385846		0.269964	0.355252	0.323675	0.363942	0.401132	0.418405	0.350304	0.31834	0.280763	0.349207	0.386656	0.346884	0.382247	0.385946	4.93272		0.00138197	0.00181857
2019	7.82	3.935	5.406	3.533	1.802	1.004	4.177	5.646	7.37	4.227	2.476	4.338	2.698	2.523			0.271886	0.355453	0.323812	0.3641	0.401334	0.418499	0.350247	0.318649	0.281566	0.349172	0.386836	0.346784	0.382061	0.385825		0.271986	0.355553	0.323912	0.3642	0.401434	0.418599	0.350347	0.318749	0.281666	0.349272	0.386936	0.346884	0.382161	0.385925	4.93762		0.00139232	0.00182011
2018	7.708	3.905	5.382	3.52	1.782	0.993	4.154	5.613	7.327	4.21	2.459	4.33	2.693	2.517			0.274296	0.356098	0.324328	0.364379	0.401764	0.418735	0.350742	0.319359	0.282491	0.349538	0.387202	0.346956	0.382168	0.385954		0.274396	0.356198	0.324428	0.364479	0.401864	0.418835	0.350842	0.319459	0.282591	0.349638	0.387302	0.347056	0.382268	0.386054	4.94541		0.00140466	0.00182341
2017	7.569	3.866	5.341	3.491	1.754	0.978	4.109	5.557	7.242	4.176	2.435	4.299	2.681	2.499			0.277285	0.356937	0.32521	0.365003	0.402366	0.419058	0.35171	0.320564	0.284319	0.350269	0.387718	0.347623	0.382426	0.386341		0.277385	0.357037	0.32531	0.365103	0.402466	0.419158	0.35181	0.320664	0.284419	0.350369	0.387818	0.347723	0.382526	0.386441	4.95823		0.00141996	0.00182771
2016	7.517	3.857	5.34	3.475	1.743	0.972	4.091	5.549	7.173	4.172	2.425	4.286	2.686	2.505			0.278404	0.357131	0.325231	0.365347	0.402603	0.419187	0.352097	0.320736	0.285803	0.350355	0.387933	0.347903	0.382319	0.386212		0.278504	0.357231	0.325331	0.365447	0.402703	0.419287	0.352197	0.320836	0.285903	0.350455	0.388033	0.348003	0.382419	0.386312	4.96266		0.00142569	0.0018287
2015	7.402	3.816	5.29	3.439	1.72	0.956	4.041	5.489	7.107	4.132	2.398	4.245	2.658	2.488			0.280878	0.358012	0.326307	0.366122	0.403097	0.419531	0.353173	0.322026	0.287223	0.351215	0.388514	0.348785	0.382921	0.386578		0.280978	0.358112	0.326407	0.366222	0.403197	0.419631	0.353273	0.322126	0.287323	0.351315	0.388614	0.348885	0.383021	0.386678	4.97578		0.00143835	0.00183321
2014	7.297	3.779	5.265	3.403	1.693	0.942	4.02	5.432	7.08	4.12	2.381	4.199	2.664	2.482			0.283136	0.358808	0.326844	0.366896	0.403678	0.419832	0.353624	0.323252	0.287804	0.351473	0.388879	0.349774	0.382792	0.386707		0.283236	0.358908	0.326944	0.366996	0.403778	0.419932	0.353724	0.323352	0.287904	0.351573	0.388979	0.349874	0.382892	0.386807	4.9849		0.00144991	0.00183729
2013	7.244	3.724	5.218	3.362	1.694	0.93	3.965	5.382	7.009	4.117	2.336	4.137	2.638	2.465			0.284276	0.359991	0.327855	0.367778	0.403657	0.42009	0.354807	0.324328	0.289331	0.351538	0.389847	0.351108	0.383351	0.387072		0.284376	0.360091	0.327955	0.367878	0.403757	0.42019	0.354907	0.324428	0.289431	0.351638	0.389947	0.351208	0.383451	0.387172	4.99643		0.00145575	0.00184334
人口自然变动X9 2022	11.41	4.23	-0.7	0.34	3.67	3.92	2.31	-3	1.6	-0.45	0.84	-1.34	-2.76	-2.82			0.194666	0.349107	0.455152	0.432781	0.361153	0.355775	0.390407	0.504625	0.405679	0.449774	0.422026	0.468918	0.499462	0.500753		0.194766	0.349207	0.455252	0.432881	0.361253	0.355875	0.390507	0.504725	0.405779	0.449874	0.422126	0.469018	0.499562	0.500853	5.79168		0.000997023	0.00178763
2021	12.08	4.81	-0.24	0.42	5.89	6.42	3.8	0.46	2.2	-0.4	1.89	-1.22	-3.3	-2.97			0.180254	0.336632	0.445257	0.43106	0.313401	0.302	0.358357	0.4302	0.392773	0.448699	0.399441	0.466337	0.511078	0.503979		0.180354	0.336732	0.445357	0.43116	0.313501	0.3021	0.358457	0.4303	0.392873	0.448799	0.399541	0.466437	0.511178	0.504079	5.52087		0.000923248	0.00172376
2020	12.03	3.48	2.07	3.51	7.94	8.97	0.53	3.47	5.67	0.71	5.09	0.07	-1.45	-0.59			0.181329	0.36524	0.395569	0.364595	0.269305	0.24715	0.428694	0.365455	0.318133	0.424823	0.330609	0.438589	0.471284	0.452786		0.181429	0.36534	0.395669	0.364695	0.269405	0.24725	0.428794	0.365555	0.318233	0.424923	0.330709	0.438689	0.471384	0.452886	5.05496		0.000928754	0.00187021
2019	14.47	7.81	4.55	3.72	11.39	10.57	5.51	5.86	5.79	4.09	6.83	1.96	1.71	2.46			0.128845	0.272102	0.342224	0.360077	0.195096	0.212734	0.321575	0.314046	0.315552	0.352119	0.293181	0.397935	0.403313	0.38718		0.128945	0.272202	0.342324	0.360177	0.195196	0.212834	0.321675	0.314146	0.315652	0.352219	0.293281	0.398035	0.403413	0.38728	4.29738		0.000660081	0.00139343
2018	18.43	10.01	7.62	8.39	15.73	15.65	10.83	10.04	11.79	8.12	9.77	7.16	4.55	7.04			0.0436653	0.22478	0.276188	0.259626	0.101742	0.103463	0.207141	0.224134	0.186492	0.265433	0.229942	0.286083	0.342224	0.288664		0.0437653	0.22488	0.276288	0.259726	0.101842	0.103563	0.207241	0.224234	0.186592	0.265533	0.230042	0.286183	0.342324	0.288764	3.04098		0.000224039	0.00115118
2017	6.82	2.41	0.22	4.58	6.19	6.07	4.38	1.48	9.58	0.96	4.16	2.99	-1.68	-2.39			0.293396	0.388256	0.435362	0.341579	0.306948	0.309529	0.345881	0.40826	0.234029	0.419445	0.350613	0.37578	0.476231	0.491504		0.293496	0.388356	0.435462	0.341679	0.307048	0.309629	0.345981	0.40836	0.234129	0.419545	0.350713	0.37588	0.476331	0.491604	5.17821		0.00150244	0.00198803
2016	15.55	10.61	9.43	10.32	13.78	16.63	12.45	10.84	9.27	9.63	11.38	9.54	10.23	6.99			0.105614	0.211874	0.237255	0.218111	0.143687	0.0823833	0.172295	0.206926	0.240697	0.232953	0.195311	0.234889	0.220047	0.28974		0.105714	0.211974	0.237355	0.218211	0.143787	0.0824833	0.172395	0.207026	0.240797	0.233053	0.195411	0.234989	0.220147	0.28984	2.79318		0.000541161	0.00108511
2015	14.49	9.74	4.73	10.73	15.71	14.54	5.22	10.62	3.93	2.84	7.31	11.17	-2.03	2.5			0.128415	0.230587	0.338352	0.209292	0.102173	0.127339	0.327812	0.211658	0.35556	0.379006	0.282857	0.199828	0.48376	0.38632		0.128515	0.230687	0.338452	0.209392	0.102273	0.127439	0.327912	0.211758	0.35566	0.379106	0.282957	0.199928	0.48386	0.38642	3.76436		0.000657879	0.00118091
2014	7.22	15.01	9.01	12.08	-0.47	13.01	13.82	9.31	10.09	0.87	19.27	14.82	9.93	6.73			0.284792	0.11723	0.24629	0.180254	0.450204	0.16025	0.142826	0.239837	0.223059	0.421381	0.0255969	0.121316	0.2265	0.295332		0.284892	0.11733	0.24639	0.180354	0.450304	0.16035	0.142926	0.239937	0.223159	0.421481	0.0256969	0.121416	0.2266	0.295432	3.13627		0.00145839	0.000600621
2013	15.32	-26.03	-0.59	20.46	7.67	16.06	12.31	15.55	13.02	7.44	5.03	-17.29	13.25	4.69			0.110561	1	0.452786	0	0.275113	0.094644	0.175307	0.105614	0.160034	0.28006	0.331899	0.812003	0.155087	0.339213		0.110661	1.0001	0.452886	0.0001	0.275213	0.094744	0.175407	0.105714	0.160134	0.28016	0.331999	0.812103	0.155187	0.339313	4.29372		0.000566486	0.00511961
总户数X10 2022	2.7	1.186	1.7	1.018	0.481	0.261	1.021	1.653	2.193	1.095	0.674	1.259	0.806	0.718			0.382018	0.414584	0.403528	0.418197	0.429748	0.434481	0.418133	0.404539	0.392923	0.416541	0.425597	0.413014	0.422758	0.42465		0.382118	0.414684	0.403628	0.418297	0.429848	0.434581	0.418233	0.404639	0.393023	0.416641	0.425697	0.413114	0.422858	0.42475	5.80211		0.0019561	0.00212281
2021	2.616	1.177	1.684	1.014	0.471	0.26	1.009	1.628	2.173	1.1	0.668	1.255	0.799	0.714			0.383824	0.414777	0.403872	0.418284	0.429963	0.434502	0.418391	0.405076	0.393353	0.416434	0.425726	0.4131	0.422908	0.424737		0.383924	0.414877	0.403972	0.418384	0.430063	0.434602	0.418491	0.405176	0.393453	0.416534	0.425826	0.4132	0.423008	0.424837	5.80635		0.00196535	0.0021238
2020	2.425	1.165	1.667	1.001	0.46	0.259	0.997	1.59	2.119	1.1	0.658	1.253	0.792	0.71			0.387933	0.415035	0.404237	0.418563	0.4302	0.434524	0.418649	0.405894	0.394515	0.416434	0.425941	0.413143	0.423059	0.424823		0.388033	0.415135	0.404337	0.418663	0.4303	0.434624	0.418749	0.405994	0.394615	0.416534	0.426041	0.413243	0.423159	0.424923	5.81435		0.00198638	0.00212512
2019	2.36	1.157	1.657	0.999	0.456	0.258	1	1.581	2.098	1.101	0.654	1.254	0.79	0.71			0.389331	0.415208	0.404453	0.418606	0.430286	0.434545	0.418585	0.406087	0.394967	0.416412	0.426027	0.413121	0.423102	0.424823		0.389431	0.415308	0.404553	0.418706	0.430386	0.434645	0.418685	0.406187	0.395067	0.416512	0.426127	0.413221	0.423202	0.424923	5.81695		0.00199353	0.002126
2018	2.307	1.148	1.645	0.998	0.451	0.256	0.996	1.596	2.093	1.115	0.65	1.255	0.785	0.71			0.390471	0.415401	0.404711	0.418628	0.430394	0.434588	0.418671	0.405765	0.395074	0.416111	0.426113	0.4131	0.423209	0.424823		0.390571	0.415501	0.404811	0.418728	0.430494	0.434688	0.418771	0.405865	0.395174	0.416211	0.426213	0.4132	0.423309	0.424923	5.81846		0.00199937	0.00212699
2017	2.258	1.137	1.633	0.995	0.445	0.253	0.985	1.568	2.077	1.116	0.647	1.252	0.783	0.708			0.391525	0.415638	0.404969	0.418692	0.430523	0.434653	0.418907	0.406367	0.395418	0.416089	0.426178	0.413164	0.423252	0.424866		0.391625	0.415738	0.405069	0.418792	0.430623	0.434753	0.419007	0.406467	0.395518	0.416189	0.426278	0.413264	0.423352	0.424966	5.82164		0.00200477	0.0021282
2016	2.25	1.133	1.636	0.996	0.445	0.252	0.988	1.579	2.068	1.115	0.648	1.254	0.782	0.711			0.391697	0.415724	0.404904	0.418671	0.430523	0.434674	0.418843	0.40613	0.395612	0.416111	0.426156	0.413121	0.423274	0.424801		0.391797	0.415824	0.405004	0.418771	0.430623	0.434774	0.418943	0.40623	0.395712	0.416211	0.426256	0.413221	0.423374	0.424901	5.82164		0.00200565	0.00212864
2015	2.224	1.125	1.627	0.99	0.442	0.249	0.982	1.574	2.053	1.109	0.646	1.248	0.78	0.709			0.392256	0.415896	0.405098	0.4188	0.430587	0.434739	0.418972	0.406238	0.395935	0.41624	0.426199	0.41325	0.423317	0.424844		0.392356	0.415996	0.405198	0.4189	0.430687	0.434839	0.419072	0.406338	0.396035	0.41634	0.426299	0.41335	0.423417	0.424944	5.82377		0.00200851	0.00212952
2014	2.201	1.117	1.617	0.984	0.437	0.247	0.978	1.573	2.032	1.108	0.645	1.241	0.779	0.708			0.392751	0.416068	0.405313	0.418929	0.430695	0.434782	0.419058	0.406259	0.396386	0.416262	0.426221	0.413401	0.423338	0.424866		0.392851	0.416168	0.405413	0.419029	0.430795	0.434882	0.419158	0.406359	0.396486	0.416362	0.426321	0.413501	0.423438	0.424966	5.82573		0.00201104	0.0021304
2013	2.199	1.111	1.614	0.99	0.441	0.246	0.971	1.573	2.032	1.109	0.644	1.231	0.774	0.709			0.392794	0.416197	0.405378	0.4188	0.430609	0.434803	0.419208	0.406259	0.396386	0.41624	0.426242	0.413616	0.423446	0.424844		0.392894	0.416297	0.405478	0.4189	0.430709	0.434903	0.419308	0.406359	0.396486	0.41634	0.426342	0.413716	0.423546	0.424944	5.82622		0.00201126	0.00213106
在校学生数X11 2022	13.38	5.867	7.194	5.583	2.957	1.768	6.965	8.763	12.5	5.94	3.963	6.339	3.468	3.123			0.152291	0.313895	0.285352	0.320004	0.37649	0.402065	0.290277	0.251602	0.17122	0.312325	0.354851	0.303743	0.365498	0.372919		0.152391	0.313995	0.285452	0.320104	0.37659	0.402165	0.290377	0.251702	0.17132	0.312425	0.354951	0.303843	0.365598	0.373019	4.27393		0.000780103	0.00160737
2021	12.907	5.767	7.052	5.526	2.941	1.789	6.824	8.771	12.289	5.963	3.896	6.382	3.483	3.115			0.162465	0.316046	0.288406	0.32123	0.376834	0.401613	0.29331	0.25143	0.175758	0.311831	0.356292	0.302818	0.365175	0.373091		0.162565	0.316146	0.288506	0.32133	0.376934	0.401713	0.29341	0.25153	0.175858	0.311931	0.356392	0.302918	0.365275	0.373191	4.2977		0.000832186	0.00161838
2020	12.347	5.617	6.84	5.384	2.904	1.759	6.635	8.66	11.943	5.983	3.787	6.39	3.458	3.074			0.174511	0.319273	0.292966	0.324285	0.37763	0.402259	0.297376	0.253818	0.183201	0.3114	0.358636	0.302646	0.365713	0.373973		0.174611	0.319373	0.293066	0.324385	0.37773	0.402359	0.297476	0.253918	0.183301	0.3115	0.358736	0.302746	0.365813	0.374073	4.33909		0.000893849	0.0016349
2019	11.823	5.469	6.63	4.553	2.867	1.693	12.573	8.487	11.557	5.932	3.655	6.34	3.395	2.999			0.185782	0.322456	0.297483	0.34216	0.378425	0.403678	0.169649	0.257539	0.191504	0.312497	0.361476	0.303721	0.367068	0.375586		0.185882	0.322556	0.297583	0.34226	0.378525	0.403778	0.169749	0.257639	0.191604	0.312597	0.361576	0.303821	0.367168	0.375686	4.27043		0.000951547	0.0016512
2018	10.933	5.269	6.36	4.947	2.396	1.608	6.129	8.306	11.074	5.841	3.475	6.183	3.281	2.893			0.204926	0.326758	0.303291	0.333685	0.388557	0.405507	0.30826	0.261433	0.201893	0.314455	0.365347	0.307098	0.36952	0.377866		0.205026	0.326858	0.303391	0.333785	0.388657	0.405607	0.30836	0.261533	0.201993	0.314555	0.365447	0.307198	0.36962	0.377966	4.47		0.00104955	0.00167322
2017	10.555	5.071	6.104	4.805	2.717	1.529	5.868	8.101	6.485	5.739	3.283	6.019	3.164	2.806			0.213057	0.331017	0.308798	0.336739	0.381652	0.407206	0.313874	0.265842	0.300602	0.316649	0.369477	0.310626	0.372037	0.379738		0.213157	0.331117	0.308898	0.336839	0.381752	0.407306	0.313974	0.265942	0.300702	0.316749	0.369577	0.310726	0.372137	0.379838	4.60871		0.00109117	0.00169502
2016	10.088	4.919	5.875	4.735	2.626	1.467	5.735	7.94	10.319	5.64	3.154	5.842	3.092	2.742			0.223102	0.334287	0.313723	0.338245	0.383609	0.408539	0.316735	0.269305	0.218133	0.318778	0.372252	0.314433	0.373586	0.381114		0.223202	0.334387	0.313823	0.338345	0.383709	0.408639	0.316835	0.269405	0.218233	0.318878	0.372352	0.314533	0.373686	0.381214	4.56724		0.00114259	0.00171176
2015	9.732	4.771	5.606	4.683	2.484	1.422	5.6	7.923	10.07	4.922	3.045	5.647	3.023	2.654			0.230759	0.33747	0.31951	0.339363	0.386664	0.409507	0.319639	0.269671	0.223489	0.334222	0.374597	0.318628	0.37507	0.383007		0.230859	0.33757	0.31961	0.339463	0.386764	0.409607	0.319739	0.269771	0.223589	0.334322	0.374697	0.318728	0.37517	0.383107	4.623		0.00118179	0.00172806
2014	9.499	4.635	5.411	4.696	1.848	1.381	5.575	7.954	9.976	5.422	2.904	5.508	2.987	2.58			0.235771	0.340396	0.323704	0.339084	0.400344	0.410389	0.320176	0.269004	0.225511	0.323467	0.37763	0.321618	0.375844	0.384599		0.235871	0.340496	0.323804	0.339184	0.400444	0.410489	0.320276	0.269104	0.225611	0.323567	0.37773	0.321718	0.375944	0.384699	4.64894		0.00120745	0.00174303
2013	9.296	4.568	5.186	4.712	2.531	1.367	5.617	8.119	9.984	5.339	2.85	5.392	2.943	2.494			0.240138	0.341837	0.328544	0.33874	0.385653	0.41069	0.319273	0.265455	0.225339	0.325253	0.378791	0.324113	0.376791	0.386449		0.240238	0.341937	0.328644	0.33884	0.385753	0.41079	0.319373	0.265555	0.225439	0.325353	0.378891	0.324213	0.376891	0.386549	4.64846		0.0012298	0.00175041
																																														195.347
每百万人口在学人数X12 2022	16.517	14.724	13.292	15.735	16.125	17.279	16.566	15.507	16.802	14.055	15.882	14.649	12.951	12.457			16.4953	14.7023	13.2703	15.7133	16.1033	17.2573	16.5443	15.4853	16.7803	14.0333	15.8603	14.6273	12.9293	12.4353		16.4954	14.7024	13.2704	15.7134	16.1034	17.2574	16.5444	15.4854	16.7804	14.0334	15.8604	14.6274	12.9294	12.4354	212.239		0.00110514	0.000985019
2021	16.115	14.534	13.021	15.58	16.097	17.553	16.268	15.475	16.545	14.103	15.627	14.729	12.972	12.39			16.0933	14.5123	12.9993	15.5583	16.0753	17.5313	16.2463	15.4533	16.5233	14.0813	15.6053	14.7073	12.9503	12.3683		16.0934	14.5124	12.9994	15.5584	16.0754	17.5314	16.2464	15.4534	16.5234	14.0814	15.6054	14.7074	12.9504	12.3684	210.707		0.00107821	0.000972289
2020	15.602	14.224	12.626	15.186	15.988	17.369	15.878	15.286	16.114	14.145	15.218	14.729	12.836	12.19			15.5803	14.2023	12.6043	15.1643	15.9663	17.3473	15.8563	15.2643	16.0923	14.1233	15.1963	14.7073	12.8143	12.1683		15.5804	14.2024	12.6044	15.1644	15.9664	17.3474	15.8564	15.2644	16.0924	14.1234	15.1964	14.7074	12.8144	12.1684	207.089		0.00104384	0.00095152
2019	15.12	13.898	12.264	12.887	15.909	16.868	30.103	15.032	15.682	14.034	14.762	14.615	12.584	11.886			15.0983	13.8763	12.2423	12.8653	15.8873	16.8463	30.0813	15.0103	15.6603	14.0123	14.7403	14.5933	12.5623	11.8643		15.0984	13.8764	12.2424	12.8654	15.8874	16.8464	30.0814	15.0104	15.6604	14.0124	14.7404	14.5934	12.5624	11.8644	215.342		0.00101155	0.000929679
2018	14.184	13.494	11.818	14.054	13.447	16.19	14.756	14.798	15.113	13.875	14.131	14.281	12.182	11.494			14.1623	13.4723	11.7963	14.0323	13.4253	16.1683	14.7343	14.7763	15.0913	13.8533	14.1093	14.2593	12.1603	11.4723		14.1624	13.4724	11.7964	14.0324	13.4254	16.1684	14.7344	14.7764	15.0914	13.8534	14.1094	14.2594	12.1604	11.4724	193.515		0.00094884	0.000902612
2017	13.946	13.117	11.429	13.766	15.489	15.636	14.28	14.578	8.955	13.744	13.481	14.002	11.801	11.227			13.9243	13.0953	11.4073	13.7443	15.4673	15.6143	14.2583	14.5563	8.93334	13.7223	13.4593	13.9803	11.7793	11.2053		13.9244	13.0954	11.4074	13.7444	15.4674	15.6144	14.2584	14.5564	8.93344	13.7224	13.4594	13.9804	11.7794	11.2054	185.149		0.000932895	0.000877355
2016	13.42	12.754	11.003	13.627	15.063	15.093	14.018	14.309	14.385	13.52	13.005	13.631	11.513	10.944			13.3983	12.7323	10.9813	13.6053	15.0413	15.0713	13.9963	14.2873	14.3633	13.4983	12.9833	13.6093	11.4913	10.9223		13.3984	12.7324	10.9814	13.6054	15.0414	15.0714	13.9964	14.2874	14.3634	13.4984	12.9834	13.6094	11.4914	10.9224	185.983		0.000897655	0.000853035
2015	13.147	12.502	10.598	13.617	14.444	14.873	13.858	14.433	14.169	11.912	12.699	13.301	11.372	10.667			13.1253	12.4803	10.5763	13.5953	14.4223	14.8513	13.8363	14.4113	14.1473	11.8903	12.6773	13.2793	11.3503	10.6453		13.1254	12.4804	10.5764	13.5954	14.4224	14.8514	13.8364	14.4114	14.1474	11.8904	12.6774	13.2794	11.3504	10.6454	181.29		0.000879364	0.000836151
2014	13.018	12.264	10.278	13.801	10.915	14.654	13.868	14.644	14.091	13.16	12.199	13.119	11.213	10.396			12.9963	12.2423	10.2563	13.7793	10.8933	14.6323	13.8463	14.6223	14.0693	13.1383	12.1773	13.0973	11.1913	10.3743		12.9964	12.2424	10.2564	13.7794	10.8934	14.6324	13.8464	14.6224	14.0694	13.1384	12.1774	13.0974	11.1914	10.3744	177.318		0.000870722	0.000820206
2013	12.832	12.268	9.939	14.015	14.942	14.694	14.166	15.087	14.245	12.969	12.203	13.033	11.158	10.117			12.8103	12.2463	9.91734	13.9933	14.9203	14.6723	14.1443	15.0653	14.2233	12.9473	12.1813	13.0113	11.1363	10.0953		12.8104	12.2464	9.91744	13.9934	14.9204	14.6724	14.1444	15.0654	14.2234	12.9474	12.1814	13.0114	11.1364	10.0954	181.366		0.00085826	0.000820474
每十万人口拥有的学校数量X13 2022	17.78	12.25	14.47	18.46	23.28	20.52	26.9	18.12	21.87	12.59	17.95	19.53	11.39	12.6			17.7583	12.2283	14.4483	18.4383	23.2583	20.4983	26.8783	18.0983	21.8483	12.5683	17.9283	19.5083	11.3683	12.5783		17.7584	12.2284	14.4484	18.4384	23.2584	20.4984	26.8784	18.0984	21.8484	12.5684	17.9284	19.5084	11.3684	12.5784	247.408		0.00118976	0.000819268
2021	17.93	12.48	14.44	18.38	23.21	20.31	26.91	18.1	21.27	13.17	17.97	20.1	11.43	12.49			17.9083	12.4583	14.4183	18.3583	23.1883	20.2883	26.8883	18.0783	21.2483	13.1483	17.9483	20.0783	11.4083	12.4683		17.9084	12.4584	14.4184	18.3584	23.1884	20.2884	26.8884	18.0784	21.2484	13.1484	17.9484	20.0784	11.4084	12.4684	247.888		0.00119981	0.000834677
2020	18.04	12.86	14.1	18.28	23.29	55.89	27.11	18.11	21.26	13.64	17.32	20.54	11.25	13.36			18.0183	12.8383	14.0783	18.2583	23.2683	55.8683	27.0883	18.0883	21.2383	13.6183	17.2983	20.5183	11.2283	13.3383		18.0184	12.8384	14.0784	18.2584	23.2684	55.8684	27.0884	18.0884	21.2384	13.6184	17.2984	20.5184	11.2284	13.3384	284.748		0.00120718	0.000860136
2019	18.52	12.88	13.89	18.34	23.58	55.99	27.15	18.33	21.21	13.93	17.17	20.31	11.12	14.43			18.4983	12.8583	13.8683	18.3183	23.5583	55.9683	27.1283	18.3083	21.1883	13.9083	17.1483	20.2883	11.0983	14.4083		18.4984	12.8584	13.8684	18.3184	23.5584	55.9684	27.1284	18.3084	21.1884	13.9084	17.1484	20.2884	11.0984	14.4084	286.548		0.00123934	0.000861476
2018	18.75	12.55	13.81	18.58	22.28	56.58	27.28	18.92	21.18	15.06	16.96	19.96	11.14	14.18			18.7283	12.5283	13.7883	18.5583	22.2583	56.5583	27.2583	18.8983	21.1583	15.0383	16.9383	19.9383	11.1183	14.1583		18.7284	12.5284	13.7884	18.5584	22.2584	56.5584	27.2584	18.8984	21.1584	15.0384	16.9384	19.9384	11.1184	14.1584	286.928		0.00125475	0.000839367
2017	20.16	12.73	14.47	23.12	23.83	57.67	27.43	19.25	18.49	38.13	17.21	20.89	11.26	14.12			20.1383	12.7083	14.4483	23.0983	23.8083	57.6483	27.4083	19.2283	18.4683	38.1083	17.1883	20.8683	11.2383	14.0983		20.1384	12.7084	14.4484	23.0984	23.8084	57.6484	27.4084	19.2284	18.4684	38.1084	17.1884	20.8684	11.2384	14.0984	318.458		0.00134921	0.000851427
2016	21.66	12.45	14.98	24.58	27.48	58.13	29.45	23.14	23.31	27.3	25.94	30.31	11.13	15.97			21.6383	12.4283	14.9583	24.5583	27.4583	58.1083	29.4283	23.1183	23.2883	27.2783	25.9183	30.2883	11.1083	15.9483		21.6384	12.4284	14.9584	24.5584	27.4584	58.1084	29.4284	23.1184	23.2884	27.2784	25.9184	30.2884	11.1084	15.9484	345.528		0.00144971	0.000832668
2015	23.21	19.26	20.17	30.04	27.91	59.09	29.77	24.96	24.1	32.67	31.49	36.2	19	18.29			23.1883	19.2383	20.1483	30.0183	27.8883	59.0683	29.7483	24.9383	24.0783	32.6483	31.4683	36.1783	18.9783	18.2683		23.1884	19.2384	20.1484	30.0184	27.8884	59.0684	29.7484	24.9384	24.0784	32.6484	31.4684	36.1784	18.9784	18.2684	395.858		0.00155355	0.00128892
2014	24.57	22.04	25.77	30.18	28.47	59.85	29.88	25.13	24.93	35.58	33.56	37.32	18.13	31.75			24.5483	22.0183	25.7483	30.1583	28.4483	59.8283	29.8583	25.1083	24.9083	35.5583	33.5383	37.2983	18.1083	31.7283		24.5484	22.0184	25.7484	30.1584	28.4484	59.8284	29.8584	25.1084	24.9084	35.5584	33.5384	37.2984	18.1084	31.7284	426.858		0.00164467	0.00147517
2013	24.64	28.31	26.72	30.75	28.4	60.2	30.24	25.38	25.17	49.85	34.08	38.58	27.75	32.13			24.6183	28.2883	26.6983	30.7283	28.3783	60.1783	30.2183	25.3583	25.1483	49.8283	34.0583	38.5583	27.7283	32.1083		24.6184	28.2884	26.6984	30.7284	28.3784	60.1784	30.2184	25.3584	25.1484	49.8284	34.0584	38.5584	27.7284	32.1084	461.898		0.00164936	0.00189524
生均财政性经费X14 2022	11.8	14.08	11.43	9.5	12.8	12.42	8.74	8.06	7.8	13.73	10.28	12.19	11.96	11.51			11.7783	14.0583	11.4083	9.47834	12.7783	12.3983	8.71834	8.03834	7.77834	13.7083	10.2583	12.1683	11.9383	11.4883		11.7784	14.0584	11.4084	9.47844	12.7784	12.3984	8.71844	8.03844	7.77844	13.7084	10.2584	12.1684	11.9384	11.4884	155.998		0.00078912	0.000941873
2021	11.94	14.84	11.31	9.59	12.62	11.95	8.03	7.96	7.72	13.63	10.24	11.14	11.87	12			11.9183	14.8183	11.2883	9.56834	12.5983	11.9283	8.00834	7.93834	7.69834	13.6083	10.2183	11.1183	11.8483	11.9783		11.9184	14.8184	11.2884	9.56844	12.5984	11.9284	8.00844	7.93844	7.69844	13.6084	10.2184	11.1184	11.8484	11.9784	154.538		0.000798499	0.00099279
2020	12.13	15.17	11.2	9.82	12.8	11.71	8.17	8.48	8.03	13.95	10.35	10.94	10.67	12.22			12.1083	15.1483	11.1783	9.79834	12.7783	11.6883	8.14834	8.45834	8.00834	13.9283	10.3283	10.9183	10.6483	12.1983		12.1084	15.1484	11.1784	9.79844	12.7784	11.6884	8.14844	8.45844	8.00844	13.9284	10.3284	10.9184	10.6484	12.1984	155.338		0.000811229	0.0010149
2019	11.94	14.48	11.55	12.63	12.91	11.74	4.02	7.54	8.14	13.65	10.67	10.3	9.33	12.62			11.9183	14.4583	11.5283	12.6083	12.8883	11.7183	3.99834	7.51834	8.11834	13.6283	10.6483	10.2783	9.30834	12.5983		11.9184	14.4584	11.5284	12.6084	12.8884	11.7184	3.99844	7.51844	8.11844	13.6284	10.6484	10.2784	9.30844	12.5984	151.218		0.000798499	0.000968671
2018	11.85	13.91	11.45	9.6	12.91	9.87	8.74	7.47	7.87	12.13	9.71	9.82	9.99	11.69			11.8283	13.8883	11.4283	9.57834	12.8883	9.84834	8.71834	7.44834	7.84834	12.1083	9.68834	9.79834	9.96834	11.6683		11.8284	13.8884	11.4284	9.57844	12.8884	9.84844	8.71844	7.44844	7.84844	12.1084	9.68844	9.79844	9.96844	11.6684	146.708		0.000792469	0.000930483
2017	11.1	13.95	12.69	10.35	10.5	10.86	8.51	6.53	13.17	12.19	9.77	10.17	9.85	12.3			11.0783	13.9283	12.6683	10.3283	10.4783	10.8383	8.48834	6.50834	13.1483	12.1683	9.74834	10.1483	9.82834	12.2783		11.0784	13.9284	12.6684	10.3284	10.4784	10.8384	8.48844	6.50844	13.1484	12.1684	9.74844	10.1484	9.82844	12.2784	151.638		0.000742222	0.000933163
2016	9.66	13.84	12.38	9.96	11.04	10.4	7.94	7.16	7.92	11.71	10.24	9.86	10.82	189.64			9.63834	13.8183	12.3583	9.93834	11.0183	10.3783	7.91834	7.13834	7.89834	11.6883	10.2183	9.83834	10.7983	189.618		9.63844	13.8184	12.3584	9.93844	11.0184	10.3784	7.91844	7.13844	7.89844	11.6884	10.2184	9.83844	10.7984	189.618	322.268		0.000645746	0.000925793
2015	9.5	14.04	11.77	9.19	10.04	9.85	7.47	6.43	7.34	12.22	9.66	9.46	9.5	12.81			9.47834	14.0183	11.7483	9.16834	10.0183	9.82834	7.44834	6.40834	7.31834	12.1983	9.63834	9.43834	9.47834	12.7883		9.47844	14.0184	11.7484	9.16844	10.0184	9.82844	7.44844	6.40844	7.31844	12.1984	9.63844	9.43844	9.47844	12.7884	138.978		0.000635027	0.000939193
2014	7.95	9.8	9.87	8.1	10.65	8.46	6.18	5.45	5.78	9.19	8.32	8.64	8.99	12.37			7.92834	9.77834	9.84834	8.07834	10.6283	8.43834	6.15834	5.42834	5.75834	9.16834	8.29834	8.61834	8.96834	12.3483		7.92844	9.77844	9.84844	8.07844	10.6284	8.43844	6.15844	5.42844	5.75844	9.16844	8.29844	8.61844	8.96844	12.3484	119.448		0.000531181	0.000655126
2013	7.56	9.2	9.59	7.98	6.71	7.54	5.75	4.93	5.31	8.86	7.72	7.73	9.21	11.78			7.53834	9.17834	9.56834	7.95834	6.68834	7.51834	5.72834	4.90834	5.28834	8.83834	7.69834	7.70834	9.18834	11.7583		7.53844	9.17844	9.56844	7.95844	6.68844	7.51844	5.72844	4.90844	5.28844	8.83844	7.69844	7.70844	9.18844	11.7584	109.568		0.000505053	0.000614928
教师与学生比X15 2022	61.98	63.58	66.02	63.7	61.28	66.22	58.21	60.28	57.06	65.58	60.02	62.3	64.24	68.15			61.9583	63.5583	65.9983	63.6783	61.2583	66.1983	58.1883	60.2583	57.0383	65.5583	59.9983	62.2783	64.2183	68.1283		61.9584	63.5584	65.9984	63.6784	61.2584	66.1984	58.1884	60.2584	57.0384	65.5584	59.9984	62.2784	64.2184	68.1284	878.318		0.00415103	0.00425822
2021	61.86	62.82	65.29	62.78	60.86	63.46	57.1	58.72	55.73	63.82	60.31	60.68	62.29	64.16			61.8383	62.7983	65.2683	62.7583	60.8383	63.4383	57.0783	58.6983	55.7083	63.7983	60.2883	60.6583	62.2683	64.1383		61.8384	62.7984	65.2684	62.7584	60.8384	63.4384	57.0784	58.6984	55.7084	63.7984	60.2884	60.6584	62.2684	64.1384	859.578		0.00414299	0.0042073
2020	60.79	61.94	64.19	63.58	60.99	61.97	56.2	56.62	54.84	69.84	59.8	26.91	59.07	62.05			60.7683	61.9183	64.1683	63.5583	60.9683	61.9483	56.1783	56.5983	54.8183	69.8183	59.7783	26.8883	59.0483	62.0283		60.7684	61.9184	64.1684	63.5584	60.9684	61.9484	56.1784	56.5984	54.8184	69.8184	59.7784	26.8884	59.0484	62.0284	818.488		0.0040713	0.00414835
2019	59.26	60.12	62.01	58.95	38.78	58.38	41.97	55.02	52.32	57.88	58.36	55.23	56.63	59.49			59.2383	60.0983	61.9883	58.9283	38.7583	58.3583	41.9483	54.9983	52.2983	57.8583	58.3383	55.2083	56.6083	59.4683		59.2384	60.0984	61.9884	58.9284	38.7584	58.3584	41.9484	54.9984	52.2984	57.8584	58.3384	55.2084	56.6084	59.4684	774.098		0.00396879	0.00402641
2018	60.84	59.76	61.77	60.03	66.55	58.1	54.78	54.96	52.73	57.35	57.76	55.17	57.69	59.29			60.8183	59.7383	61.7483	60.0083	66.5283	58.0783	54.7583	54.9383	52.7083	57.3283	57.7383	55.1483	57.6683	59.2683		60.8184	59.7384	61.7484	60.0084	66.5284	58.0784	54.7584	54.9384	52.7084	57.3284	57.7384	55.1484	57.6684	59.2684	816.478		0.00407465	0.00400229
2017	59.03	59.62	67.33	58.34	56.3	57.46	71.2	54.36	47.86	55.31	58.02	53.36	59.24	59.88			59.0083	59.5983	67.3083	58.3183	56.2783	57.4383	71.1783	54.3383	47.8383	55.2883	57.9983	53.3383	59.2183	59.8583		59.0084	59.5984	67.3084	58.3184	56.2784	57.4384	71.1784	54.3384	47.8384	55.2884	57.9984	53.3384	59.2184	59.8584	817.008		0.00395338	0.00399291
2016	57.36	58.65	61.77	56.88	53.84	50.96	50.62	39.75	51.34	50.58	55.66	53.75	60.05	58.23			57.3383	58.6283	61.7483	56.8583	53.8183	50.9383	50.5983	39.7283	51.3183	50.5583	55.6383	53.7283	60.0283	58.2083		57.3384	58.6284	61.7484	56.8584	53.8184	50.9384	50.5984	39.7284	51.3184	50.5584	55.6384	53.7284	60.0284	58.2084	759.138		0.0038415	0.00392793
2015	55.11	57	63.84	55.67	63.61	51.05	50.38	50.02	51.39	55.27	55.19	54.36	57.11	57.57			55.0883	56.9783	63.8183	55.6483	63.5883	51.0283	50.3583	49.9983	51.3683	55.2483	55.1683	54.3383	57.0883	57.5483		55.0884	56.9784	63.8184	55.6484	63.5884	51.0284	50.3584	49.9984	51.3684	55.2484	55.1684	54.3384	57.0884	57.5484	777.268		0.00369076	0.00381738
2014	55.1	55.08	64.96	55.59	73.85	52.12	72.08	49.44	51.15	49.87	56.67	54.58	58.83	62.31			55.0783	55.0583	64.9383	55.5683	73.8283	52.0983	72.0583	49.4183	51.1283	49.8483	56.6483	54.5583	58.8083	62.2883		55.0784	55.0584	64.9384	55.5684	73.8284	52.0984	72.0584	49.4184	51.1284	49.8484	56.6484	54.5584	58.8084	62.2884	811.328		0.00369009	0.00368875
2013	55.24	60.54	66.79	52.37	29.3	50.37	53.04	48.27	50.04	50.52	57.28	55.7	59.73	67.64			55.2183	60.5183	66.7683	52.3483	29.2783	50.3483	53.0183	48.2483	50.0183	50.4983	57.2583	55.6783	59.7083	67.6183		55.2184	60.5184	66.7684	52.3484	29.2784	50.3484	53.0184	48.2484	50.0184	50.4984	57.2584	55.6784	59.7084	67.6184	756.528		0.00369947	0.00405455
																																														14926.1
GDP增长率X16 2022	1.4	-1	2.5	4	3.5	5.1	8.2	3.2	2.5	4.2	3.4	3.9	3.6	6.1			1.45213	-0.947875	2.55213	4.05213	3.55213	5.15213	8.25213	3.25213	2.55213	4.25213	3.45213	3.95213	3.65213	6.15213	02选取1.2479 作为平移量	2.70003	0.300025	3.80003	5.30003	4.80003	6.40003	9.50003	4.50003	3.80003	5.50003	4.70003	5.20003	4.90003	7.40003	68.8004		0.000690196	7.66941e-05
2021	6.1	2	6.8	10	9.7	11.4	10	6.5	10.3	9.8	14.4	8.1	11.3	10.5			6.15213	2.05213	6.85213	10.0521	9.75213	11.4521	10.0521	6.55213	10.3521	9.85213	14.4521	8.15213	11.3521	10.5521	每个数据加上1.2479实现非负平移	7.40003	3.30003	8.10003	11.3	11	12.7	11.3	7.80003	11.6	11.1	15.7	9.40003	12.6	11.8	145.1		0.00189164	0.000843571
2020	3.7	1.1	2.3	8.2	-1.3	5.3	2.5	7	3.1	6.3	6.8	5.2	6.4	6.4			3.75213	1.15213	2.35213	8.25213	-1.24787	5.35213	2.55213	7.05213	3.15213	6.35213	6.85213	5.25213	6.45213	6.45213		5.00003	2.40003	3.60003	9.50003	2.51002e-05	6.60003	3.80003	8.30003	4.40003	7.60003	8.10003	6.50003	7.70003	7.70003	81.2004		0.00127813	0.000613508
2019	5	2.4	6.5	4.2	8.1	5.4	7.8	9	7.2	9	11.8	6	4.3	8			5.05213	2.45213	6.55213	4.25213	8.15213	5.45213	7.85213	9.05213	7.25213	9.05213	11.8521	6.05213	4.35213	8.05213		6.30003	3.70003	7.80003	5.50003	9.40003	6.70003	9.10003	10.3	8.50003	10.3	13.1	7.30003	5.60003	9.30003	112.9		0.00161045	0.000945821
2018	5.4	6.4	6.9	1.8	8	7.2	6	10	7.1	7.1	8.9	6.4	7.2	10.2			5.45213	6.45213	6.95213	1.85213	8.05213	7.25213	6.05213	10.0521	7.15213	7.15213	8.95213	6.45213	7.25213	10.2521		6.70003	7.70003	8.20003	3.10003	9.30003	8.50003	7.30003	11.3	8.40003	8.40003	10.2	7.70003	8.50003	11.5	116.8		0.0017127	0.00196832
2017	8	7	3.9	6	10.2	6.5	8.3	8.9	7	8.5	5.3	7.7	7.1	8.8			8.05213	7.05213	3.95213	6.05213	10.2521	6.55213	8.35213	8.95213	7.05213	8.55213	5.35213	7.75213	7.15213	8.85213		9.30003	8.30003	5.20003	7.30003	11.5	7.80003	9.60003	10.2	8.30003	9.80003	6.60003	9.00003	8.40003	10.1	121.4		0.00237732	0.0021217
2016	6.6	7.1	6.9	7.2	7.4	8.3	8.7	7.7	7.4	8.5	8.1	4.8	3.5	7.7			6.65213	7.15213	6.95213	7.25213	7.45213	8.35213	8.75213	7.75213	7.45213	8.55213	8.15213	4.85213	3.55213	7.75213		7.90003	8.40003	8.20003	8.50003	8.70003	9.60003	10	9.00003	8.70003	9.80003	9.40003	6.10003	4.80003	9.00003	118.1		0.00201945	0.00214726
2015	8.4	7	7.8	7.5	9.4	9.2	7.8	7.1	8	7.9	7.4	3.9	3	6.2			8.45213	7.05213	7.85213	7.55213	9.45213	9.25213	7.85213	7.15213	8.05213	7.95213	7.45213	3.95213	3.05213	6.25213		9.70003	8.30003	9.10003	8.80003	10.7	10.5	9.10003	8.40003	9.30003	9.20003	8.70003	5.20003	4.30003	7.50003	118.8		0.00247957	0.0021217
2014	8.7	8.5	8.3	6	12.8	10	9.8	4.6	8.3	8.1	6.3	8.1	6	7.7			8.75213	8.55213	8.35213	6.05213	12.8521	10.0521	9.85213	4.65213	8.35213	8.15213	6.35213	8.15213	6.05213	7.75213		10	9.80003	9.60003	7.30003	14.1	11.3	11.1	5.90003	9.60003	9.40003	7.60003	9.40003	7.30003	9.00003	131.4		0.00255626	0.00250514
2013	11.7	9.7	10.9	12.8	12.1	11.1	7.9	7.6	10.3	8.5	8.7	6.4	3	8.8			11.7521	9.75213	10.9521	12.8521	12.1521	11.1521	7.95213	7.65213	10.3521	8.55213	8.75213	6.45213	3.05213	8.85213		13	11	12.2	14.1	13.4	12.4	9.20003	8.90003	11.6	9.80003	10	7.70003	4.30003	10.1	147.7		0.00332314	0.00281189
城市化率X17 2022	7.723	7.423	4.954	4.434	6.09	6.519	3.448	3.926	3.999	3.828	4.069	3.673	3.819	3.779			7.77513	7.47513	5.00613	4.48613	6.14213	6.57113	3.50013	3.97813	4.05113	3.88013	4.12113	3.72513	3.87113	3.83113		9.02303	8.72303	6.25403	5.73403	7.39003	7.81903	4.74803	5.22603	5.29903	5.12803	5.36903	4.97303	5.11903	5.07903	85.8844		0.00230652	0.00222983
2021	7.696	7.401	4.878	4.429	6.034	6.484	3.38	3.872	3.946	3.765	4.037	3.624	3.8	3.724			7.74813	7.45313	4.93013	4.48113	6.08613	6.53613	3.43213	3.92413	3.99813	3.81713	4.08913	3.67613	3.85213	3.77613		8.99603	8.70103	6.17803	5.72903	7.33403	7.78403	4.68003	5.17203	5.24603	5.06503	5.33703	4.92403	5.10003	5.02403	85.2704		0.00229961	0.0022242
2020	7.621	7.373	4.792	4.505	5.399	6.364	3.324	3.814	3.896	3.673	3.98	3.541	3.742	3.644			7.67313	7.42513	4.84413	4.55713	5.45113	6.41613	3.37613	3.86613	3.94813	3.72513	4.03213	3.59313	3.79413	3.69613		8.92103	8.67303	6.09203	5.80503	6.69903	7.66403	4.62403	5.11403	5.19603	4.97303	5.28003	4.84103	5.04203	4.94403	83.8684		0.00228044	0.00221705
2019	7.381	7.203	4.686	4.448	5.328	6.151	3.233	3.756	3.84	3.536	3.891	3.403	3.632	3.526			7.43313	7.25513	4.73813	4.50013	5.38013	6.20313	3.28513	3.80813	3.89213	3.58813	3.94313	3.45513	3.68413	3.57813		8.68103	8.50303	5.98603	5.74803	6.62803	7.45103	4.53303	5.05603	5.14003	4.83603	5.19103	4.70303	4.93203	4.82603	82.2144		0.00221909	0.00217359
2018	7.111	7.083	4.597	4.435	5.267	5.97	3.145	3.697	3.779	3.476	3.844	3.336	3.539	3.44			7.16313	7.13513	4.64913	4.48713	5.31913	6.02213	3.19713	3.74913	3.83113	3.52813	3.89613	3.38813	3.59113	3.49213		8.41103	8.38303	5.89703	5.73503	6.56703	7.27003	4.44503	4.99703	5.07903	4.77603	5.14403	4.63603	4.83903	4.74003	80.9194		0.00215007	0.00214292
2017	6.89	6.963	4.509	4.386	5.219	5.825	3.075	3.65	3.728	3.403	3.775	3.23	3.488	3.353			6.94213	7.01513	4.56113	4.43813	5.27113	5.87713	3.12713	3.70213	3.78013	3.45513	3.82713	3.28213	3.54013	3.40513		8.19003	8.26303	5.80903	5.68603	6.51903	7.12503	4.37503	4.95003	5.02803	4.70303	5.07503	4.53003	4.78803	4.65303	79.6944		0.00209358	0.00211224
2016	6.566	6.751	4.365	4.304	5.06	5.618	2.969	3.568	3.67	3.266	3.666	3.119	3.35	3.219			6.61813	6.80313	4.41713	4.35613	5.11213	5.67013	3.02113	3.62013	3.72213	3.31813	3.71813	3.17113	3.40213	3.27113		7.86603	8.05103	5.66503	5.60403	6.36003	6.91803	4.26903	4.86803	4.97003	4.56603	4.96603	4.41903	4.65003	4.51903	77.6914		0.00201076	0.00205805
2015	6.329	6.605	4.291	4.27	4.978	5.449	2.924	3.497	3.625	3.157	3.571	3.032	3.254	3.118			6.38113	6.65713	4.34313	4.32213	5.03013	5.50113	2.97613	3.54913	3.67713	3.20913	3.62313	3.08413	3.30613	3.17013		7.62903	7.90503	5.59103	5.57003	6.27803	6.74903	4.22403	4.79703	4.92503	4.45703	4.87103	4.33203	4.55403	4.41803	76.3004		0.00195017	0.00202073
2014	6.105	6.427	4.177	4.216	4.905	5.272	2.83	3.45	3.541	2.987	3.48	2.857	3.134	2.994			6.15713	6.47913	4.22913	4.26813	4.95713	5.32413	2.88213	3.50213	3.59313	3.03913	3.53213	2.90913	3.18613	3.04613		7.40503	7.72703	5.47703	5.51603	6.20503	6.57203	4.13003	4.75003	4.84103	4.28703	4.78003	4.15703	4.43403	4.29403	74.5754		0.00189291	0.00197523
2013	5.886	6.247	4.063	4.177	4.748	5.101	2.786	3.413	3.474	2.787	3.415	2.74	2.988	2.857			5.93813	6.29913	4.11513	4.22913	4.80013	5.15313	2.83813	3.46513	3.52613	2.83913	3.46713	2.79213	3.04013	2.90913		7.18603	7.54703	5.36303	5.47703	6.04803	6.40103	4.08603	4.71303	4.77403	4.08703	4.71503	4.04003	4.28803	4.15703	72.8824		0.00183693	0.00192921
社会消费品零售总额X18 2022	23.59	13.04	9.33	3.21	3.45	1.32	4.88	4.61	8.65	4.19	2.01	3.1	1.46	2.55			23.6421	13.0921	9.38213	3.26213	3.50213	1.37213	4.93213	4.66213	8.70213	4.24213	2.06213	3.15213	1.51213	2.60213		24.89	14.34	10.63	4.51003	4.75003	2.62003	6.18003	5.91003	9.95003	5.49003	3.31003	4.40003	2.76003	3.85003	103.59		0.00636253	0.00366568
2021	23.64	13.32	9.43	3.16	3.5	1.38	4.7	4.58	8.41	4.21	2	3.09	1.44	2.52			23.6921	13.3721	9.48213	3.21213	3.55213	1.43213	4.75213	4.63213	8.46213	4.26213	2.05213	3.14213	1.49213	2.57213		24.94	14.62	10.73	4.46003	4.80003	2.68003	6.00003	5.88003	9.71003	5.51003	3.30003	4.39003	2.74003	3.82003	103.58		0.00637531	0.00373725
2020	21.8	12.7	8.89	2.84	3.14	1.29	4.03	4.11	7.53	3.8	1.82	2.78	1.3	2.27			21.8521	12.7521	8.94213	2.89213	3.19213	1.34213	4.08213	4.16213	7.58213	3.85213	1.87213	2.83213	1.35213	2.32213		23.1	14	10.19	4.14003	4.44003	2.59003	5.33003	5.41003	8.83003	5.10003	3.12003	4.08003	2.60003	3.57003	96.5004		0.00590496	0.00357877
2019	23.28	13.33	9.67	3.01	3.45	1.49	4.01	4.12	7.36	3.87	1.73	2.97	1.46	2.27			23.3321	13.3821	9.72213	3.06213	3.50213	1.54213	4.06213	4.17213	7.41213	3.92213	1.78213	3.02213	1.51213	2.32213		24.58	14.63	10.97	4.31003	4.75003	2.79003	5.31003	5.42003	8.66003	5.17003	3.03003	4.27003	2.76003	3.57003	100.22		0.00628328	0.00373981
2018	22.34	11.52	8.79	2.66	3.22	1.43	3.7	3.76	7.76	3.59	1.62	2.78	1.36	2.1			22.3921	11.5721	8.84213	2.71213	3.27213	1.48213	3.75213	3.81213	7.81213	3.64213	1.67213	2.83213	1.41213	2.15213		23.64	12.82	10.09	3.96003	4.52003	2.73003	5.00003	5.06003	9.06003	4.89003	2.92003	4.08003	2.66003	3.40003	94.8304		0.006043	0.00327713
2017	20.53	10.55	8.08	2.52	2.96	1.31	3.41	3.56	7.04	3.27	1.49	2.55	1.27	1.86			20.5821	10.6021	8.13213	2.57213	3.01213	1.36213	3.46213	3.61213	7.09213	3.32213	1.54213	2.60213	1.32213	1.91213		21.83	11.85	9.38003	3.82003	4.26003	2.61003	4.71003	4.86003	8.34003	4.57003	2.79003	3.85003	2.57003	3.16003	88.6004		0.00558031	0.00302917
2016	18.47	9.56	7.33	2.34	2.63	1.17	3.13	3.25	6.39	2.86	1.35	2.29	1.14	1.63			18.5221	9.61213	7.38213	2.39213	2.68213	1.22213	3.18213	3.30213	6.44213	2.91213	1.40213	2.34213	1.19213	1.68213		19.77	10.86	8.63003	3.64003	3.93003	2.47003	4.43003	4.55003	7.69003	4.16003	2.65003	3.59003	2.44003	2.93003	81.7404		0.00505372	0.0027761
2015	16.73	8.69	6.65	2.24	2.03	1.05	2.83	2.99	5.83	2.53	1.25	2.1	1.07	1.46			16.7821	8.74213	6.70213	2.29213	2.08213	1.10213	2.88213	3.04213	5.88213	2.58213	1.30213	2.15213	1.12213	1.51213		18.03	9.99003	7.95003	3.54003	3.33003	2.35003	4.13003	4.29003	7.13003	3.83003	2.55003	3.40003	2.37003	2.76003	75.6504		0.00460894	0.00255371
2014	15.18	7.93	6.08	2.1	1.86	0.95	3.03	2.82	5.31	2.27	1.15	1.95	1.01	1.3			15.2321	7.98213	6.13213	2.15213	1.91213	1.00213	3.08213	2.87213	5.36213	2.32213	1.20213	2.00213	1.06213	1.35213		16.48	9.23003	7.38003	3.40003	3.16003	2.25003	4.33003	4.12003	6.61003	3.57003	2.45003	3.25003	2.31003	2.60003	71.1404		0.00421272	0.00235943
2013	13.59	7.04	5.42	1.94	1.67	0.84	2.69	2.57	4.71	1.99	1.03	1.75	0.93	1.13			13.6421	7.09213	5.47213	1.99213	1.72213	0.892125	2.74213	2.62213	4.76213	2.04213	1.08213	1.80213	0.982125	1.18213		14.89	8.34003	6.72003	3.24003	2.97003	2.14003	3.99003	3.87003	6.01003	3.29003	2.33003	3.05003	2.23003	2.43003	65.5004		0.00380627	0.00213192
城镇单位从业人员年平均工资X19 2022	10.38	9.4	8.75	8.04	8.59	9.19	8.46	8.26	7.83	9.14	8.55	8.94	8.09	8.67			10.4321	9.45213	8.80213	8.09213	8.64213	9.24213	8.51213	8.31213	7.88213	9.19213	8.60213	8.99213	8.14213	8.72213		11.68	10.7	10.05	9.34003	9.89003	10.49	9.76003	9.56003	9.13003	10.44	9.85003	10.24	9.39003	9.97003	140.49		0.00298571	0.0027352
2021	9.8	9.1	8.35	7.7	8.18	8.81	7.99	7.92	7.74	8.74	8.01	8.72	7.69	8.05			9.85213	9.15213	8.40213	7.75213	8.23213	8.86213	8.04213	7.97213	7.79213	8.79213	8.06213	8.77213	7.74213	8.10213		11.1	10.4	9.65003	9.00003	9.48003	10.11	9.29003	9.22003	9.04003	10.04	9.31003	10.02	8.99003	9.35003	135		0.00283745	0.00265851
2020	9.22	8.42	7.83	7.28	7.52	8.7	7.28	7.51	7.34	8.22	7.91	8.11	7.44	7.55			9.27213	8.47213	7.88213	7.33213	7.57213	8.75213	7.33213	7.56213	7.39213	8.27213	7.96213	8.16213	7.49213	7.60213		10.52	9.72003	9.13003	8.58003	8.82003	10	8.58003	8.81003	8.64003	9.52003	9.21003	9.41003	8.74003	8.85003	128.53		0.00268919	0.00248469
2019	8.66	7.51	7.43	6.67	7.03	7.59	6.59	7.11	6.97	7.44	7.12	7.5	6.71	6.82			8.71213	7.56213	7.48213	6.72213	7.08213	7.64213	6.64213	7.16213	7.02213	7.49213	7.17213	7.55213	6.76213	6.87213		9.96003	8.81003	8.73003	7.97003	8.33003	8.89003	7.89003	8.41003	8.27003	8.74003	8.42003	8.80003	8.01003	8.12003	119.35		0.00254604	0.00225207
2018	8.03	7	6.93	6.18	6.48	6.75	6.08	6.46	6.39	6.7	6.66	6.73	6.55	6.28			8.08213	7.05213	6.98213	6.23213	6.53213	6.80213	6.13213	6.51213	6.44213	6.75213	6.71213	6.78213	6.60213	6.33213		9.33003	8.30003	8.23003	7.48003	7.78003	8.05003	7.38003	7.76003	7.69003	8.00003	7.96003	8.03003	7.85003	7.58003	111.42		0.00238499	0.0021217
2017	7.28	6.34	6.21	5.49	5.69	5.79	5.58	5.8	5.86	6.21	6.19	6.19	6.04	5.66			7.33213	6.39213	6.26213	5.54213	5.74213	5.84213	5.63213	5.85213	5.91213	6.26213	6.24213	6.24213	6.09213	5.71213		8.58003	7.64003	7.51003	6.79003	6.99003	7.09003	6.88003	7.10003	7.16003	7.51003	7.49003	7.49003	7.34003	6.96003	102.53		0.00219327	0.00195299
2016	6.62	5.88	5.63	5.01	5.21	5.01	5.13	5.19	5.12	5.46	5.86	5.72	5.65	5.13			6.67213	5.93213	5.68213	5.06213	5.26213	5.06213	5.18213	5.24213	5.17213	5.51213	5.91213	5.77213	5.70213	5.18213		7.92003	7.18003	6.93003	6.31003	6.51003	6.31003	6.43003	6.49003	6.42003	6.76003	7.16003	7.02003	6.95003	6.43003	94.8204		0.00202456	0.0018354
2015	6.19	5.27	5.16	4.53	4.72	4.7	4.61	4.99	4.62	4.95	5.3	5.05	5.24	4.54			6.24213	5.32213	5.21213	4.58213	4.77213	4.75213	4.66213	5.04213	4.67213	5.00213	5.35213	5.10213	5.29213	4.59213		7.49003	6.57003	6.46003	5.83003	6.02003	6.00003	5.91003	6.29003	5.92003	6.25003	6.60003	6.35003	6.54003	5.84003	88.0704		0.00191464	0.00167947
2014	5.32	4.78	4.52	3.71	4.28	4.16	4.01	4.02	4.02	4.09	4.15	3.82	4.05	3.86			5.37213	4.83213	4.57213	3.76213	4.33213	4.21213	4.06213	4.07213	4.07213	4.14213	4.20213	3.87213	4.10213	3.91213		6.62003	6.08003	5.82003	5.01003	5.58003	5.46003	5.31003	5.32003	5.32003	5.39003	5.45003	5.12003	5.35003	5.16003	76.9904		0.00169225	0.00155421
2013	4.7	4.39	4.07	3.33	3.89	3.96	3.71	3.62	3.6	3.77	3.76	3.55	3.92	3.44			4.75213	4.44213	4.12213	3.38213	3.94213	4.01213	3.76213	3.67213	3.65213	3.82213	3.81213	3.60213	3.97213	3.49213		6.00003	5.69003	5.37003	4.63003	5.19003	5.26003	5.01003	4.92003	4.90003	5.07003	5.06003	4.85003	5.22003	4.74003	71.9104		0.00153376	0.00145452
																																														3911.97
较上一年财政性经费增长率X20 2022	2.479	-3.517	3.083	0.094	2.021	2.713	11.117	1.232	2.785	0.308	2.156	8.706	0.266	-3.827			2.71865	-3.27735	3.32265	0.333653	2.26065	2.95265	11.3567	1.47165	3.02465	0.547653	2.39565	8.94565	0.505653	-3.58735	每个数据加上14.6944实现非负平移	17.4131	11.4171	18.0171	15.0281	16.9551	17.6471	26.0511	16.1661	17.7191	15.2421	17.0901	23.6401	15.2001	11.1071	238.693		0.00108545	0.000711686
2021	2.911	0.458	4.178	0.227	-0.135	3.786	1.089	-5.009	-1.126	-2.589	1.734	1.731	12.148	-0.479			3.15065	0.697653	4.41765	0.466653	0.104653	4.02565	1.32865	-4.76935	-0.886347	-2.34935	1.97365	1.97065	12.3877	-0.239347		17.8451	15.3921	19.1121	15.1611	14.7991	18.7201	16.0231	9.92505	13.8081	12.3451	16.6681	16.6651	27.0821	14.4551	228.001		0.00111238	0.000959469
2020	6.092	7.617	0.026	-8.102	0.378	3.674	7.328	14.743	1.902	3.038	0.564	7.062	16.488	-0.793			6.33165	7.85665	0.265653	-7.86235	0.617653	3.91365	7.56765	14.9827	2.14165	3.27765	0.803653	7.30165	16.7277	-0.553347		21.0261	22.5511	14.9601	6.83205	15.3121	18.6081	22.2621	29.6771	16.8361	17.9721	15.4981	21.9961	31.4221	14.1411	269.094		0.00131067	0.00140573
2019	8.962	7.993	5.179	21.171	19.651	25.205	-5.785	3.191	8.037	14.314	15.56	7.528	-3.446	11.949			9.20165	8.23265	5.41865	21.4107	19.8907	25.4447	-5.54535	3.43065	8.27665	14.5537	15.7997	7.76765	-3.20635	12.1887		23.8961	22.9271	20.1131	36.1051	34.5851	40.1391	9.14905	18.1251	22.9711	29.2481	30.4941	22.4621	11.4881	26.8831	348.586		0.00148957	0.00142917
2018	10.594	3.604	-5.992	-4.506	8.485	-4.455	7.352	17.341	1.979	1.287	5.142	-0.801	5.265	-2			10.8337	3.84365	-5.75235	-4.26635	8.72465	-4.21535	7.59165	17.5807	2.21865	1.52665	5.38165	-0.561347	5.50465	-1.76035		25.5281	18.5381	8.94205	10.4281	23.4191	10.4791	22.2861	32.2751	16.9131	16.2211	20.0761	14.1331	20.1991	12.9341	252.372		0.0015913	0.00115558
2017	20.193	3.967	6.447	5.452	-1.621	8.918	9.666	-6.967	4.503	5.857	-0.681	6.195	-6.848	0.745			20.4327	4.20665	6.68665	5.69165	-1.38135	9.15765	9.90565	-6.72735	4.74265	6.09665	-0.441347	6.43465	-6.60835	0.984653		35.1271	18.9011	21.3811	20.3861	13.3131	23.8521	24.6001	7.96705	19.4371	20.7911	14.2531	21.1291	8.08605	15.6791	264.903		0.00218966	0.0011782
2016	5.374	1.628	10.227	9.526	16.192	8.929	8.847	11.582	10.64	9.824	9.861	7.841	16.394	0.75			5.61365	1.86765	10.4667	9.76565	16.4317	9.16865	9.08665	11.8217	10.8797	10.0637	10.1007	8.08065	16.6337	0.989653		20.3081	16.5621	25.1611	24.4601	31.1261	23.8631	23.7811	26.5161	25.5741	24.7581	24.7951	22.7751	31.3281	15.6841	336.692		0.00126591	0.0010324
2015	22.536	47.381	23.526	13.174	26.778	19.863	21.429	17.536	28.202	20.755	21.781	12.292	7.042	6.485			22.7757	47.6207	23.7657	13.4137	27.0177	20.1027	21.6687	17.7757	28.4417	20.9947	22.0207	12.5317	7.28165	6.72465		37.4701	62.3151	38.4601	28.1081	41.7121	34.7971	36.3631	32.4701	43.1361	35.6891	36.7151	27.2261	21.9761	21.4191	497.857		0.00233571	0.00388443
2014	7.338	8.088	7.44	1.117	15.833	13.288	6.592	8.35	8.779	5.305	9.723	14.152	-0.996	8.682			7.57765	8.32765	7.67965	1.35665	16.0727	13.5277	6.83165	8.58965	9.01865	5.54465	9.96265	14.3917	-0.756347	8.92165		22.2721	23.0221	22.3741	16.0511	30.7671	28.2221	21.5261	23.2841	23.7131	20.2391	24.6571	29.0861	13.9381	23.6161	322.768		0.00138834	0.00143509
2013	6.433	4.266	5.854	-0.45	-1.048	-14.934	4.699	17.751	4.787	-7.326	-4.801	10.174	1.841	6.298			6.67265	4.50565	6.09365	-0.210347	-0.808347	-14.6943	4.93865	17.9907	5.02665	-7.08635	-4.56135	10.4137	2.08065	6.53765		21.3671	19.2001	20.7881	14.4841	13.8861	5.3374e-05	19.6331	32.6851	19.7211	7.60805	10.1331	25.1081	16.7751	21.2321	242.621		0.00133192	0.00119684
较上一年每万名学生所享受的财政性经费增长率X21 2022	0.185	-0.599	0.429	0.017	0.683	1.535	1.596	0.141	0.223	0.052	0.544	1.373	0.077	-1.225			0.424653	-0.359347	0.668653	0.256653	0.922653	1.77465	1.83565	0.380653	0.462653	0.291653	0.783653	1.61265	0.316653	-0.985347		15.1191	14.3351	15.3631	14.9511	15.6171	16.4691	16.5301	15.0751	15.1571	14.9861	15.4781	16.3071	15.0111	13.7091	214.108		0.000942452	0.000893581
2021	0.226	0.079	0.592	0.041	-0.046	2.116	0.16	-0.571	-0.092	-0.434	0.445	0.271	3.488	-0.154			0.465653	0.318653	0.831653	0.280653	0.193653	2.35565	0.399653	-0.331347	0.147653	-0.194347	0.684653	0.510653	3.72765	0.0856534		15.1601	15.0131	15.5261	14.9751	14.8881	17.0501	15.0941	14.3631	14.8421	14.5001	15.3791	15.2051	18.4221	14.7801	215.198		0.000945008	0.000935844
2020	0.493	1.356	0.004	-1.505	0.13	2.089	1.104	1.702	0.159	0.508	0.149	1.105	4.768	-0.258			0.732653	1.59565	0.243653	-1.26535	0.369653	2.32865	1.34365	1.94165	0.398653	0.747653	0.388653	1.34465	5.00765	-0.0183466		15.4271	16.2901	14.9381	13.4291	15.0641	17.0231	16.0381	16.6361	15.0931	15.4421	15.0831	16.0391	19.7021	14.6761	220.881		0.000961651	0.00101545
2019	0.758	1.462	0.781	4.65	6.854	14.888	-0.46	0.376	0.695	2.413	4.257	1.187	-1.015	3.984			0.997653	1.70165	1.02065	4.88965	7.09365	15.1277	-0.220347	0.615653	0.934653	2.65265	4.49665	1.42665	-0.775347	4.22365		15.6921	16.3961	15.7151	19.5841	21.7881	29.8221	14.4741	15.3101	15.6291	17.3471	19.1911	16.1211	13.9191	18.9181	249.907		0.00097817	0.00102205
2018	0.969	0.684	-0.942	-0.911	3.541	-2.771	1.2	2.088	0.179	0.22	1.48	-0.13	1.605	-0.691			1.20865	0.923653	-0.702347	-0.671347	3.78065	-2.53135	1.43965	2.32765	0.418653	0.459653	1.71965	0.109653	1.84465	-0.451347		15.9031	15.6181	13.9921	14.0231	18.4751	12.1631	16.1341	17.0221	15.1131	15.1541	16.4141	14.8041	16.5391	14.2431	215.598		0.000991323	0.000973557
2017	1.913	0.782	1.056	1.135	-0.597	5.833	1.647	-0.86	0.694	1.021	-0.207	1.029	-2.164	0.266			2.15265	1.02165	1.29565	1.37465	-0.357347	6.07265	1.88665	-0.620347	0.933653	1.26065	0.0326534	1.26865	-1.92435	0.505653		16.8471	15.7161	15.9901	16.0691	14.3371	20.7671	16.5811	14.0741	15.6281	15.9551	14.7271	15.9631	12.7701	15.2001	220.625		0.00105017	0.000979666
2016	0.533	0.331	1.741	2.012	6.166	6.087	1.543	1.459	1.031	1.742	3.127	1.342	5.302	0.274			0.772653	0.570653	1.98065	2.25165	6.40565	6.32665	1.78265	1.69865	1.27065	1.98165	3.36665	1.58165	5.54165	0.513653		15.4671	15.2651	16.6751	16.9461	21.1001	21.0211	16.4771	16.3931	15.9651	16.6761	18.0611	16.2761	20.2361	15.2081	241.767		0.000964145	0.000951553
2015	2.316	9.931	4.197	2.813	10.78	13.968	3.827	2.213	2.801	4.217	7.153	2.177	2.329	2.443			2.55565	10.1707	4.43665	3.05265	11.0197	14.2077	4.06665	2.45265	3.04065	4.45665	7.39265	2.41665	2.56865	2.68265		17.2501	24.8651	19.1311	17.7471	25.7141	28.9021	18.7611	17.1471	17.7351	19.1511	22.0871	17.1111	17.2631	17.3771	280.242		0.00107529	0.00154997
2014	0.773	1.745	1.375	0.238	8.568	9.622	1.182	1.05	0.88	0.978	3.348	2.569	-0.333	3.365			1.01265	1.98465	1.61465	0.477653	8.80765	9.86165	1.42165	1.28965	1.11965	1.21765	3.58765	2.80865	-0.0933466	3.60465		15.7071	16.6791	16.3091	15.1721	23.5021	24.5561	16.1161	15.9841	15.8141	15.9121	18.2821	17.5031	14.6011	18.2991	244.437		0.000979105	0.0010397
2013	0.692	0.934	1.129	-0.096	-0.414	-10.925	0.837	2.186	0.479	-1.372	-1.685	1.887	0.626	2.525			0.931653	1.17365	1.36865	0.143653	-0.174347	-10.6853	1.07665	2.42565	0.718653	-1.13235	-1.44535	2.12665	0.865653	2.76465		15.6261	15.8681	16.0631	14.8381	14.5201	4.00905	15.7711	17.1201	15.4131	13.5621	13.2491	16.8211	15.5601	17.4591	205.88		0.000974056	0.000989141
平均每十万人公共图书收藏量X22 2022	4.414	6.226	3.426	3.472	4.619	13.331	2.007	2.86	2.989	5.658	4.02	3.231	5.057	3.873			4.65365	6.46565	3.66565	3.71165	4.85865	13.5707	2.24665	3.09965	3.22865	5.89765	4.25965	3.47065	5.29665	4.11265		19.3481	21.1601	18.3601	18.4061	19.5531	28.2651	16.9411	17.7941	17.9231	20.5921	18.9541	18.1651	19.9911	18.8071	274.26		0.00120607	0.00131902
2021	4.285	5.66	3.346	3.409	4.559	10.243	1.979	2.586	2.884	5.53	3.854	3.159	4.931	3.806			4.52465	5.89965	3.58565	3.64865	4.79865	10.4827	2.21865	2.82565	3.12365	5.76965	4.09365	3.39865	5.17065	4.04565		19.2191	20.5941	18.2801	18.3431	19.4931	25.1771	16.9131	17.5201	17.8181	20.4641	18.7881	18.0931	19.8651	18.7401	269.308		0.00119803	0.00128374
2020	4.108	5.323	3.251	3.325	4.547	10.23	2.13	2.445	2.794	5.376	3.685	3.096	4.759	3.617			4.34765	5.56265	3.49065	3.56465	4.78665	10.4697	2.36965	2.68465	3.03365	5.61565	3.92465	3.33565	4.99865	3.85665		19.0421	20.2571	18.1851	18.2591	19.4811	25.1641	17.0641	17.3791	17.7281	20.3101	18.6191	18.0301	19.6931	18.5511	267.763		0.00118699	0.00126273
2019	4.014	5.336	3.084	3.295	4.245	9.913	2.107	2.347	2.719	5.283	3.631	3.057	4.615	3.519			4.25365	5.57565	3.32365	3.53465	4.48465	10.1527	2.34665	2.58665	2.95865	5.52265	3.87065	3.29665	4.85465	3.75865		18.9481	20.2701	18.0181	18.2291	19.1791	24.8471	17.0411	17.2811	17.6531	20.2171	18.5651	17.9911	19.5491	18.4531	266.242		0.00118113	0.00126354
2018	3.858	5.24	2.964	3.21	4.041	9.283	1.955	2.209	2.631	5.019	3.481	3	3.691	3.401			4.09765	5.47965	3.20365	3.44965	4.28065	9.52265	2.19465	2.44865	2.87065	5.25865	3.72065	3.23965	3.93065	3.64065		18.7921	20.1741	17.8981	18.1441	18.9751	24.2171	16.8891	17.1431	17.5651	19.9531	18.4151	17.9341	18.6251	18.3351	263.06		0.00117141	0.00125756
2017	4.059	4.982	2.925	3.191	3.842	4.581	7.731	2.179	2.477	4.761	3.088	2.933	3.42	3.277			4.29865	5.22165	3.16465	3.43065	4.08165	4.82065	7.97065	2.41865	2.71665	5.00065	3.32765	3.17265	3.65965	3.51665		18.9931	19.9161	17.8591	18.1251	18.7761	19.5151	22.6651	17.1131	17.4111	19.6951	18.0221	17.8671	18.3541	18.2111	262.523		0.00118394	0.00124147
2016	4.559	5.111	2.867	3.14	3.717	3.22	7.631	2.054	2.419	4.528	2.944	2.877	3.094	3.133			4.79865	5.35065	3.10665	3.37965	3.95665	3.45965	7.87065	2.29365	2.65865	4.76765	3.18365	3.11665	3.33365	3.37265		19.4931	20.0451	17.8011	18.0741	18.6511	18.1541	22.5651	16.9881	17.3531	19.4621	17.8781	17.8111	18.0281	18.0671	260.371		0.00121511	0.00124952
2015	4.259	5.322	2.832	3.114	3.629	4.027	7.686	1.977	2.191	4.453	2.79	2.784	3.039	3.047			4.49865	5.56165	3.07165	3.35365	3.86865	4.26665	7.92565	2.21665	2.43065	4.69265	3.02965	3.02365	3.27865	3.28665		19.1931	20.2561	17.7661	18.0481	18.5631	18.9611	22.6201	16.9111	17.1251	19.3871	17.7241	17.7181	17.9731	17.9811	260.227		0.00119641	0.00126267
2014	4.135	4.834	2.887	3.092	3.55	4	7.664	1.546	2.49	3.604	2.705	2.749	2.804	2.958			4.37465	5.07365	3.12665	3.33165	3.78965	4.23965	7.90365	1.78565	2.72965	3.84365	2.94465	2.98865	3.04365	3.19765		19.0691	19.7681	17.8211	18.0261	18.4841	18.9341	22.5981	16.4801	17.4241	18.5381	17.6391	17.6831	17.7381	17.8921	258.095		0.00118868	0.00123225
2013	3.934	4.831	3.034	3.07	3.271	3.15	1.637	1.477	1.96	3.566	2.697	2.613	2.741	2.819			4.17365	5.07065	3.27365	3.30965	3.51065	3.38965	1.87665	1.71665	2.19965	3.80565	2.93665	2.85265	2.98065	3.05865		18.8681	19.7651	17.9681	18.0041	18.2051	18.0841	16.5711	16.4111	16.8941	18.5001	17.6311	17.5471	17.6751	17.7531	249.877		0.00117615	0.00123206
人均城市道路面积X23 2022	20.66	24.75	20.61	27.13	25.53	37.82	37.49	40.11	17.76	28.7	33.62	21.72	26.02	27.47			20.8997	24.9897	20.8497	27.3697	25.7697	38.0597	37.7297	40.3497	17.9997	28.9397	33.8597	21.9597	26.2597	27.7097		35.5941	39.6841	35.5441	42.0641	40.4641	52.7541	52.4241	55.0441	32.6941	43.6341	48.5541	36.6541	40.9541	42.4041	598.467		0.00221877	0.00247372
2021	20.3	23.5	20.8	27.3	25.9	35.6	38	32.4	17.6	28	34.8	23.9	25.9	26.4			20.5397	23.7397	21.0397	27.5397	26.1397	35.8397	38.2397	32.6397	17.8397	28.2397	35.0397	24.1397	26.1397	26.6397		35.2341	38.4341	35.7341	42.2341	40.8341	50.5341	52.9341	47.3341	32.5341	42.9341	49.7341	38.8341	40.8341	41.3341	589.477		0.00219633	0.0023958
2020	20.44	22.81	20.47	26.43	30.77	35.16	38.19	32.09	17.48	27.69	34.01	24.19	25.59	22.94			20.6797	23.0497	20.7097	26.6697	31.0097	35.3997	38.4297	32.3297	17.7197	27.9297	34.2497	24.4297	25.8297	23.1797		35.3741	37.7441	35.4041	41.3641	45.7041	50.0941	53.1241	47.0241	32.4141	42.6241	48.9441	39.1241	40.5241	37.8741	587.337		0.00220506	0.00235279
2019	14.32	17.15	17.1	19.6	24.97	36.04	38.5	33.23	16	28.76	32.93	23.99	25.15	21.37			14.5597	17.3897	17.3397	19.8397	25.2097	36.2797	38.7397	33.4697	16.2397	28.9997	33.1697	24.2297	25.3897	21.6097		29.2541	32.0841	32.0341	34.5341	39.9041	50.9741	53.4341	48.1641	30.9341	43.6941	47.8641	38.9241	40.0841	36.3041	558.187		0.00182356	0.00199997
2018	13.87	16.16	18.83	17.84	26.25	34.56	37.87	31.26	16.31	25.56	30.46	24.46	23.27	18.61			14.1097	16.3997	19.0697	18.0797	26.4897	34.7997	38.1097	31.4997	16.5497	25.7997	30.6997	24.6997	23.5097	18.8497		28.8041	31.0941	33.7641	32.7741	41.1841	49.4941	52.8041	46.1941	31.2441	40.4941	45.3941	39.3941	38.2041	33.5441	544.387		0.00179551	0.00193826
2017	14.33	13.57	16	17.96	20.52	31.11	36.28	22.7	15.75	20.29	18.62	23.46	20.19	17.92			14.5697	13.8097	16.2397	18.1997	20.7597	31.3497	36.5197	22.9397	15.9897	20.5297	18.8597	23.6997	20.4297	18.1597		29.2641	28.5041	30.9341	32.8941	35.4541	46.0441	51.2141	37.6341	30.6841	35.2241	33.5541	38.3941	35.1241	32.8541	497.777		0.00182419	0.00177681
2016	14.73	12.76	14.08	17.48	20.69	33.11	35.24	20.43	15.45	19.83	18.49	13.16	21.5	13.8			14.9697	12.9997	14.3197	17.7197	20.9297	33.3497	35.4797	20.6697	15.6897	20.0697	18.7297	13.3997	21.7397	14.0397		29.6641	27.6941	29.0141	32.4141	35.6241	48.0441	50.1741	35.3641	30.3841	34.7641	33.4241	28.0941	36.4341	28.7341	479.827		0.00184912	0.00172632
2015	14.31	12.02	13.45	14.04	20.7	35.87	32.89	19.22	15.25	17.72	13.71	11.67	21.63	12.74			14.5497	12.2597	13.6897	14.2797	20.9397	36.1097	33.1297	19.4597	15.4897	17.9597	13.9497	11.9097	21.8697	12.9797		29.2441	26.9541	28.3841	28.9741	35.6341	50.8041	47.8241	34.1541	30.1841	32.6541	28.6441	26.6041	36.5641	27.6741	464.297		0.00182294	0.00168019
2014	14.16	11.77	11.85	14.6	21.39	35.59	31.67	18.3	14.42	17.03	11.16	9.51	21.76	11.29			14.3997	12.0097	12.0897	14.8397	21.6297	35.8297	31.9097	18.5397	14.6597	17.2697	11.3997	9.74965	21.9997	11.5297		29.0941	26.7041	26.7841	29.5341	36.3241	50.5241	46.6041	33.2341	29.3541	31.9641	26.0941	24.4441	36.6941	26.2241	453.577		0.00181359	0.00166461
2013	14.28	11.36	10.69	14.32	20.94	38.32	33.62	19.75	14.24	17.3	10.92	8.91	18.7	11.43			14.5197	11.5997	10.9297	14.5597	21.1797	38.5597	33.8597	19.9897	14.4797	17.5397	11.1597	9.14965	18.9397	11.6697		29.2141	26.2941	25.6241	29.2541	35.8741	53.2541	48.5541	34.6841	29.1741	32.2341	25.8541	23.8441	33.6341	26.3641	453.857		0.00182107	0.00163905
平均每千人拥有卫生技术人员人数X24 2022	11.104	10.427	8.061	6.602	7.798	7.213	5.805	4.996	5.45	7.221	5.441	6.386	5.824	5.762			11.3437	10.6667	8.30065	6.84165	8.03765	7.45265	6.04465	5.23565	5.68965	7.46065	5.68065	6.62565	6.06365	6.00165		26.0381	25.3611	22.9951	21.5361	22.7321	22.1471	20.7391	19.9301	20.3841	22.1551	20.3751	21.3201	20.7581	20.6961	307.167		0.00162309	0.00158089
2021	10.67	9.907	7.853	6.298	7.382	6.807	5.495	4.677	5.056	6.839	5.244	6.084	5.408	5.499			10.9097	10.1467	8.09265	6.53765	7.62165	7.04665	5.73465	4.91665	5.29565	7.07865	5.48365	6.32365	5.64765	5.73865		25.6041	24.8411	22.7871	21.2321	22.3161	21.7411	20.4291	19.6111	19.9901	21.7731	20.1781	21.0181	20.3421	20.4331	302.296		0.00159604	0.00154848
2020	10.127	9.37	7.488	6.088	7.241	6.537	5.272	4.431	4.645	6.09	5.488	5.802	5.056	5.312			10.3667	9.60965	7.72765	6.32765	7.48065	6.77665	5.51165	4.67065	4.88465	6.32965	5.72765	6.04165	5.29565	5.55165		25.0611	24.3041	22.4221	21.0221	22.1751	21.4711	20.2061	19.3651	19.5791	21.0241	20.4221	20.7361	19.9901	20.2461	298.024		0.00156219	0.001515
2019	9.543	8.93	6.54	5.78	6.452	6.257	4.881	4.026	4.093	5.749	4.888	5.338	4.669	4.95			9.78265	9.16965	6.77965	6.01965	6.69165	6.49665	5.12065	4.26565	4.33265	5.98865	5.12765	5.57765	4.90865	5.18965		24.4771	23.8641	21.4741	20.7141	21.3861	21.1911	19.8151	18.9601	19.0271	20.6831	19.8221	20.2721	19.6031	19.8841	291.173		0.00152579	0.00148757
2018	8.968	8.537	6.349	5.536	6.029	6.017	4.61	3.712	3.928	5.413	4.646	4.967	4.488	4.573			9.20765	8.77665	6.58865	5.77565	6.26865	6.25665	4.84965	3.95165	4.16765	5.65265	4.88565	5.20665	4.72765	4.81265		23.9021	23.4711	21.2831	20.4701	20.9631	20.9511	19.5441	18.6461	18.8621	20.3471	19.5801	19.9011	19.4221	19.5071	286.85		0.00148994	0.00146308
2017	8.673	8.237	6.153	5.371	5.732	5.902	4.394	3.602	3.679	5.181	4.457	4.785	4.309	4.469			8.91265	8.47665	6.39265	5.61065	5.97165	6.14165	4.63365	3.84165	3.91865	5.42065	4.69665	5.02465	4.54865	4.70865		23.6071	23.1711	21.0871	20.3051	20.6661	20.8361	19.3281	18.5361	18.6131	20.1151	19.3911	19.7191	19.2431	19.4031	284.021		0.00147155	0.00144438
2016	8.146	7.873	5.952	5.173	5.566	5.754	4.15	3.408	3.382	4.92	4.29	4.499	4.082	4.279			8.38565	8.11265	6.19165	5.41265	5.80565	5.99365	4.38965	3.64765	3.62165	5.15965	4.52965	4.73865	4.32165	4.51865		23.0801	22.8071	20.8861	20.1071	20.5001	20.6881	19.0841	18.3421	18.3161	19.8541	19.2241	19.4331	19.0161	19.2131	280.551		0.0014387	0.00142169
2015	7.764	7.609	5.667	4.847	5.273	5.525	3.976	3.31	3.43	4.728	4.162	4.287	3.949	4.176			8.00365	7.84865	5.90665	5.08665	5.51265	5.76465	4.21565	3.54965	3.66965	4.96765	4.40165	4.52665	4.18865	4.41565		22.6981	22.5431	20.6011	19.7811	20.2071	20.4591	18.9101	18.2441	18.3641	19.6621	19.0961	19.2211	18.8831	19.1101	277.78		0.00141489	0.00140523
2014	7.33	7.299	5.332	4.267	5.183	5.455	3.877	3.161	3.303	4.347	4.18	4.029	3.841	3.984			7.56965	7.53865	5.57165	4.50665	5.42265	5.69465	4.11665	3.40065	3.54265	4.58665	4.41965	4.26865	4.08065	4.22365		22.2641	22.2331	20.2661	19.2011	20.1171	20.3891	18.8111	18.0951	18.2371	19.2811	19.1141	18.9631	18.7751	18.9181	274.665		0.00138784	0.00138591
2013	6.842	6.974	5.084	4.208	4.837	4.972	3.639	2.928	3.122	4.004	3.924	3.715	3.634	3.634			7.08165	7.21365	5.32365	4.44765	5.07665	5.21165	3.87865	3.16765	3.36165	4.24365	4.16365	3.95465	3.87365	3.87365		21.7761	21.9081	20.0181	19.1421	19.7711	19.9061	18.5731	17.8621	18.0561	18.9381	18.8581	18.6491	18.5681	18.5681	270.594		0.00135742	0.00136565
																																														16042.3
[truncated: 48 more columns]

## Sheet: 2013
	南宁市 Nanning	柳州市 Liuzhou	桂林市 Guilin	梧州市 Wuzhou	北海市 Beihai	防城港市 Fangcheng- gang	钦州市 Qinzhou	贵港市 Guigang	玉林市 Yulin	百色市 Baise	贺州市 Hezhou	河池市 Hechi	来宾市 Laibin	崇左市 Chongzuo		01数据的标准化处理	南宁市 Nanning	柳州市 Liuzhou	桂林市 Guilin	梧州市 Wuzhou	北海市 Beihai	防城港市 Fangcheng- gang	钦州市 Qinzhou	贵港市 Guigang	玉林市 Yulin	百色市 Baise	贺州市 Hezhou	河池市 Hechi	来宾市 Laibin	崇左市 Chongzuo	根据数据的实际情况实现平移，一般加0.0001。如果出现负数，则在最小值的绝对值基础上加0.0001作为平移量	南宁市 Nanning	柳州市 Liuzhou	桂林市 Guilin	梧州市 Wuzhou	北海市 Beihai	防城港市 Fangcheng- gang	钦州市 Qinzhou	贵港市 Guigang	玉林市 Yulin	百色市 Baise	贺州市 Hezhou	河池市 Hechi	来宾市 Laibin	崇左市 Chongzuo		p值	南宁市 Nanning	柳州市 Liuzhou
教育财政性经费X1 2013	7.032	4.204	4.973	3.761	1.699	1.031	3.231	4	5.297	4.731	2.201	4.169	2.711	2.937			6.9997	4.1717	4.9407	3.7287	1.6667	0.998704	3.1987	3.9677	5.2647	4.6987	2.1687	4.1367	2.6787	2.9047		6.9998	4.1718	4.9408	3.7288	1.6668	0.998804	3.1988	3.9678	5.2648	4.6988	2.1688	4.1368	2.6788	2.9048	51.5263		0.0381882	0.0227597
地区生产总值X2 2013	2.62	1.928	1.26	0.63	0.717	0.439	0.682	0.695	1.013	0.68	0.406	0.519	0.451	0.431			2.5877	1.8957	1.2277	0.597704	0.684704	0.406704	0.649704	0.662704	0.980704	0.647704	0.373704	0.486704	0.418704	0.398704		2.5878	1.8958	1.2278	0.597804	0.684804	0.406804	0.649804	0.662804	0.980804	0.647804	0.373804	0.486804	0.418804	0.398804	12.0203		0.014118	0.0103428
人均生产总值X3 2013	3.6168	5.179	2.4151	1.8746	4.2347	4.7143	1.7195	1.2913	1.445	1.6529	1.7388	1.2553	1.7115	1.747			3.5845	5.1467	2.3828	1.8423	4.2024	4.682	1.6872	1.259	1.4127	1.6206	1.7065	1.223	1.6792	1.7147		3.5846	5.1468	2.3829	1.8424	4.2025	4.6821	1.6873	1.2591	1.4128	1.6207	1.7066	1.2231	1.6793	1.7148	34.1451		0.0195562	0.0280789
城镇居民人均可支配收入X4 2013	2.433	2.436	2.455	2.254	2.341	2.369	2.37	2.136	2.437	2.153	2.17	1.965	2.355	1.935			2.4007	2.4037	2.4227	2.2217	2.3087	2.3367	2.3377	2.1037	2.4047	2.1207	2.1377	1.9327	2.3227	1.9027		2.4008	2.4038	2.4228	2.2218	2.3088	2.3368	2.3378	2.1038	2.4048	2.1208	2.1378	1.9328	2.3228	1.9028	31.3583		0.0130978	0.0131142
城镇居民人均生活消费性支出X5 2013	1.139	1.54	1.556	1.475	1.519	1.453	1.436	1.465	1.494	1.345	1.264	1.202	1.468	1.238			1.1067	1.5077	1.5237	1.4427	1.4867	1.4207	1.4037	1.4327	1.4617	1.3127	1.2317	1.1697	1.4357	1.2057		1.1068	1.5078	1.5238	1.4428	1.4868	1.4208	1.4038	1.4328	1.4618	1.3128	1.2318	1.1698	1.4358	1.2058	19.1433		0.00603829	0.00822599
公共财政预算收入X6 2013	2.563	1.251	1.11	0.857	0.421	0.407	0.45	0.312	0.755	0.657	0.22	0.27	0.364	0.475			2.5307	1.2187	1.0777	0.824704	0.388704	0.374704	0.417704	0.279704	0.722704	0.624704	0.187704	0.237704	0.331704	0.442704		2.5308	1.2188	1.0778	0.824804	0.388804	0.374804	0.417804	0.279804	0.722804	0.624804	0.187804	0.237804	0.331804	0.442804	9.66126		0.0138071	0.00664932
公共财政预算支出X7 2013	4.173	2.406	2.866	1.76	0.995	0.885	1.343	1.405	2.037	2.326	1.073	1.98	1.236	1.409			4.1407	2.3737	2.8337	1.7277	0.962704	0.852704	1.3107	1.3727	2.0047	2.2937	1.0407	1.9477	1.2037	1.3767		4.1408	2.3738	2.8338	1.7278	0.962804	0.852804	1.3108	1.3728	2.0048	2.2938	1.0408	1.9478	1.2038	1.3768	25.4433		0.0225906	0.0129505
																																														183.298
人口数X8 2013	7.244	3.724	5.218	3.362	1.694	0.93	3.965	5.382	7.009	4.117	2.336	4.137	2.638	2.465			0.284276	0.359991	0.327855	0.367778	0.403657	0.42009	0.354807	0.324328	0.289331	0.351538	0.389847	0.351108	0.383351	0.387072		0.284376	0.360091	0.327955	0.367878	0.403757	0.42019	0.354907	0.324428	0.289431	0.351638	0.389947	0.351208	0.383451	0.387172	4.99643		0.014388	0.0182188
人口自然变动X9 2013	15.32	-26.03	-0.59	20.46	7.67	16.06	12.31	15.55	13.02	7.44	5.03	-17.29	13.25	4.69			0.110561	1	0.452786	0	0.275113	0.094644	0.175307	0.105614	0.160034	0.28006	0.331899	0.812003	0.155087	0.339213		0.110661	1.0001	0.452886	0.0001	0.275213	0.094744	0.175407	0.105714	0.160134	0.28016	0.331999	0.812103	0.155187	0.339313	4.29372		0.0055989	0.0506
总户数X10 2013	2.199	1.111	1.614	0.99	0.441	0.246	0.971	1.573	2.032	1.109	0.644	1.231	0.774	0.709			0.392794	0.416197	0.405378	0.4188	0.430609	0.434803	0.419208	0.406259	0.396386	0.41624	0.426242	0.413616	0.423446	0.424844		0.392894	0.416297	0.405478	0.4189	0.430709	0.434903	0.419308	0.406359	0.396486	0.41634	0.426342	0.413716	0.423546	0.424944	5.82622		0.0198784	0.0210625
在校学生数X11 2013	9.296	4.568	5.186	4.712	2.531	1.367	5.617	8.119	9.984	5.339	2.85	5.392	2.943	2.494			0.240138	0.341837	0.328544	0.33874	0.385653	0.41069	0.319273	0.265455	0.225339	0.325253	0.378791	0.324113	0.376791	0.386449		0.240238	0.341937	0.328644	0.33884	0.385753	0.41079	0.319373	0.265555	0.225439	0.325353	0.378891	0.324213	0.376891	0.386549	4.64846		0.0121548	0.0173003
																																														19.7648
每百万人口在学人数X12 2013	12.832	12.268	9.939	14.015	14.942	14.694	14.166	15.087	14.245	12.969	12.203	13.033	11.158	10.117			12.7534	12.1894	9.86038	13.9364	14.8634	14.6154	14.0874	15.0084	14.1664	12.8904	12.1244	12.9544	11.0794	10.0384		12.7535	12.1895	9.86048	13.9365	14.8635	14.6155	14.0875	15.0085	14.1665	12.8905	12.1245	12.9545	11.0795	10.0385	180.569		0.00846749	0.00809303
每十万人口拥有的学校数量X13 2013	24.64	28.31	26.72	30.75	28.4	60.2	30.24	25.38	25.17	49.85	34.08	38.58	27.75	32.13			24.5614	28.2314	26.6414	30.6714	28.3214	60.1214	30.1614	25.3014	25.0914	49.7714	34.0014	38.5014	27.6714	32.0514		24.5615	28.2315	26.6415	30.6715	28.3215	60.1215	30.1615	25.3015	25.0915	49.7715	34.0015	38.5015	27.6715	32.0515	461.101		0.0163072	0.0187439
生均财政性经费X14 2013	7.56	9.2	9.59	7.98	6.71	7.54	5.75	4.93	5.31	8.86	7.72	7.73	9.21	11.78			7.48138	9.12138	9.51138	7.90138	6.63138	7.46138	5.67138	4.85138	5.23138	8.78138	7.64138	7.65138	9.13138	11.7014		7.48148	9.12148	9.51148	7.90148	6.63148	7.46148	5.67148	4.85148	5.23148	8.78148	7.64148	7.65148	9.13148	11.7015	108.771		0.00496722	0.00605607
教师与学生比X15 2013	55.24	60.54	66.79	52.37	29.3	50.37	53.04	48.27	50.04	50.52	57.28	55.7	59.73	67.64			55.1614	60.4614	66.7114	52.2914	29.2214	50.2914	52.9614	48.1914	49.9614	50.4414	57.2014	55.6214	59.6514	67.5614		55.1615	60.4615	66.7115	52.2915	29.2215	50.2915	52.9615	48.1915	49.9615	50.4415	57.2015	55.6215	59.6515	67.5615	755.731		0.0366237	0.0401425
																																														1506.17
GDP增长率X16 2013	11.7	9.7	10.9	12.8	12.1	11.1	7.9	7.6	10.3	8.5	8.7	6.4	3	8.8			11.6341	9.63412	10.8341	12.7341	12.0341	11.0341	7.83412	7.53412	10.2341	8.43412	8.63412	6.33412	2.93412	8.73412		12.882	10.882	12.082	13.982	13.282	12.282	9.08202	8.78202	11.482	9.68202	9.88202	7.58202	4.18202	9.98202	146.048		0.0366607	0.0309689
城市化率X17 2013	5.886	6.247	4.063	4.177	4.748	5.101	2.786	3.413	3.474	2.787	3.415	2.74	2.988	2.857			5.82012	6.18112	3.99712	4.11112	4.68212	5.03512	2.72012	3.34712	3.40812	2.72112	3.34912	2.67412	2.92212	2.79112		7.06802	7.42902	5.24502	5.35902	5.93002	6.28302	3.96802	4.59502	4.65602	3.96902	4.59702	3.92202	4.17002	4.03902	71.2302		0.0201147	0.0211421
社会消费品零售总额X18 2013	13.59	7.04	5.42	1.94	1.67	0.84	2.69	2.57	4.71	1.99	1.03	1.75	0.93	1.13			13.5241	6.97412	5.35412	1.87412	1.60412	0.774118	2.62412	2.50412	4.64412	1.92412	0.964118	1.68412	0.864118	1.06412		14.772	8.22202	6.60202	3.12202	2.85202	2.02202	3.87202	3.75202	5.89202	3.17202	2.21202	2.93202	2.11202	2.31202	63.8482		0.0420394	0.0233989
城镇单位从业人员年平均工资X19 2013	4.7	4.39	4.07	3.33	3.89	3.96	3.71	3.62	3.6	3.77	3.76	3.55	3.92	3.44			4.63412	4.32412	4.00412	3.26412	3.82412	3.89412	3.64412	3.55412	3.53412	3.70412	3.69412	3.48412	3.85412	3.37412		5.88202	5.57202	5.25202	4.51202	5.07202	5.14202	4.89202	4.80202	4.78202	4.95202	4.94202	4.73202	5.10202	4.62202	70.2582		0.0167395	0.0158573
																																														351.385
较上一年财政性经费增长率X20 2013	6.433	4.266	5.854	-0.45	-1.048	-14.934	4.699	17.751	4.787	-7.326	-4.801	10.174	1.841	6.298			6.71343	4.54643	6.13443	-0.16957	-0.76757	-14.6536	4.97943	18.0314	5.06743	-7.04557	-4.52057	10.4544	2.12143	6.57843		21.4078	19.2408	20.8288	14.5248	13.9268	0.0408296	19.6738	32.7258	19.7618	7.64883	10.1738	25.1488	16.8158	21.2728	243.192		0.0150159	0.0134959
较上一年每万名学生所享受的财政性经费增长率X21 2013	0.692	0.934	1.129	-0.096	-0.414	-10.925	0.837	2.186	0.479	-1.372	-1.685	1.887	0.626	2.525			0.97243	1.21443	1.40943	0.18443	-0.13357	-10.6446	1.11743	2.46643	0.75943	-1.09157	-1.40457	2.16743	0.90643	2.80543		15.6668	15.9088	16.1038	14.8788	14.5608	4.04983	15.8118	17.1608	15.4538	13.6028	13.2898	16.8618	15.6008	17.4998	206.451		0.010989	0.0111587
平均每十万人公共图书收藏量X22 2013	3.934	4.831	3.034	3.07	3.271	3.15	1.637	1.477	1.96	3.566	2.697	2.613	2.741	2.819			4.21443	5.11143	3.31443	3.35043	3.55143	3.43043	1.91743	1.75743	2.24043	3.84643	2.97743	2.89343	3.02143	3.09943		18.9088	19.8058	18.0088	18.0448	18.2458	18.1248	16.6118	16.4518	16.9348	18.5408	17.6718	17.5878	17.7158	17.7938	250.448		0.013263	0.0138922
人均城市道路面积X23 2013	14.28	11.36	10.69	14.32	20.94	38.32	33.62	19.75	14.24	17.3	10.92	8.91	18.7	11.43			14.5604	11.6404	10.9704	14.6004	21.2204	38.6004	33.9004	20.0304	14.5204	17.5804	11.2004	9.19043	18.9804	11.7104		29.2548	26.3348	25.6648	29.2948	35.9148	53.2948	48.5948	34.7248	29.2148	32.2748	25.8948	23.8848	33.6748	26.4048	454.428		0.0205199	0.0184717
平均每千人拥有卫生技术人员人数X24 2013	6.842	6.974	5.084	4.208	4.837	4.972	3.639	2.928	3.122	4.004	3.924	3.715	3.634	3.634			7.12243	7.25443	5.36443	4.48843	5.11743	5.25243	3.91943	3.20843	3.40243	4.28443	4.20443	3.99543	3.91443	3.91443		21.8168	21.9488	20.0588	19.1828	19.8118	19.9468	18.6138	17.9028	18.0968	18.9788	18.8988	18.6898	18.6088	18.6088	271.165		0.0153027	0.0153953
																																														1425.68
[truncated: 45 more columns]

## Sheet: 2014
	南宁市 Nanning	柳州市 Liuzhou	桂林市 Guilin	梧州市 Wuzhou	北海市 Beihai	防城港市 Fangcheng- gang	钦州市 Qinzhou	贵港市 Guigang	玉林市 Yulin	百色市 Baise	贺州市 Hezhou	河池市 Hechi	来宾市 Laibin	崇左市 Chongzuo		01数据的标准化处理	南宁市 Nanning	柳州市 Liuzhou	桂林市 Guilin	梧州市 Wuzhou	北海市 Beihai	防城港市 Fangcheng- gang	钦州市 Qinzhou	贵港市 Guigang	玉林市 Yulin	百色市 Baise	贺州市 Hezhou	河池市 Hechi	来宾市 Laibin	崇左市 Chongzuo	根据数据的实际情况实现平移，一般加0.0001。如果出现负数，则在最小值的绝对值基础上加0.0001作为平移量	南宁市 Nanning	柳州市 Liuzhou	桂林市 Guilin	梧州市 Wuzhou	北海市 Beihai	防城港市 Fangcheng- gang	钦州市 Qinzhou	贵港市 Guigang	玉林市 Yulin	百色市 Baise	贺州市 Hezhou	河池市 Hechi	来宾市 Laibin	崇左市 Chongzuo		p值	南宁市 Nanning	柳州市 Liuzhou
教育财政性经费X1 2014	7.548	4.544	5.343	3.803	1.968	1.168	3.444	4.334	5.762	4.982	2.415	4.759	2.684	3.192			7.51459	4.51059	5.30959	3.76959	1.93459	1.13459	3.41059	4.30059	5.72859	4.94859	2.38159	4.72559	2.65059	3.15859		7.51469	4.51069	5.30969	3.76969	1.93469	1.13469	3.41069	4.30069	5.72869	4.94869	2.38169	4.72569	2.65069	3.15869	55.4797		0.0378538	0.0227217
地区生产总值X2 2014	2.862	2.117	1.358	0.676	0.827	0.465	0.784	0.733	1.099	0.735	0.426	0.587	0.47	0.46			2.82859	2.08359	1.32459	0.642594	0.793594	0.431594	0.750594	0.699594	1.06559	0.701594	0.392594	0.553594	0.436594	0.426594		2.82869	2.08369	1.32469	0.642694	0.793694	0.431694	0.750694	0.699694	1.06569	0.701694	0.392694	0.553694	0.436694	0.426694	13.1327		0.014249	0.0104962
人均生产总值X3 2014	3.9228	5.6024	2.5786	1.9861	4.887	4.9375	1.9494	1.35	1.5522	1.7833	1.789	1.3986	1.7651	1.8539			3.88939	5.56899	2.54519	1.95269	4.85359	4.90409	1.91599	1.31659	1.51879	1.74989	1.75559	1.36519	1.73169	1.82049		3.88949	5.56909	2.54529	1.95279	4.85369	4.90419	1.91609	1.31669	1.51889	1.74999	1.75569	1.36529	1.73179	1.82059	36.8896		0.0195926	0.0280532
城镇居民人均可支配收入X4 2014	2.654	2.619	2.619	2.427	2.562	2.573	2.543	2.325	2.668	2.336	2.361	2.088	2.539	2.126			2.62059	2.58559	2.58559	2.39359	2.52859	2.53959	2.50959	2.29159	2.63459	2.30259	2.32759	2.05459	2.50559	2.09259		2.62069	2.58569	2.58569	2.39369	2.52869	2.53969	2.50969	2.29169	2.63469	2.30269	2.32769	2.05469	2.50569	2.09269	33.9737		0.0132012	0.0130249
城镇居民人均生活消费性支出X5 2014	1.266	1.697	1.693	1.59	1.505	1.579	1.532	1.578	1.6	1.447	1.349	1.42	1.565	1.322			1.23259	1.66359	1.65959	1.55659	1.47159	1.54559	1.49859	1.54459	1.56659	1.41359	1.31559	1.38659	1.53159	1.28859		1.23269	1.66369	1.65969	1.55669	1.47169	1.54569	1.49869	1.54469	1.56669	1.41369	1.31569	1.38669	1.53169	1.28869	20.6767		0.00620945	0.00838053
公共财政预算收入X6 2014	2.749	1.332	1.239	0.905	0.473	0.455	0.476	0.365	0.888	0.709	0.244	0.299	0.38	0.484			2.71559	1.29859	1.20559	0.871594	0.439594	0.421594	0.442594	0.331594	0.854594	0.675594	0.210594	0.265594	0.346594	0.450594		2.71569	1.29869	1.20569	0.871694	0.439694	0.421694	0.442694	0.331694	0.854694	0.675694	0.210694	0.265694	0.346694	0.450694	10.5317		0.0136798	0.00654192
公共财政预算支出X7 2014	4.658	2.616	3.044	1.841	1.05	0.975	1.413	1.471	2.291	2.649	1.183	2.262	1.293	1.555			4.62459	2.58259	3.01059	1.80759	1.01659	0.941594	1.37959	1.43759	2.25759	2.61559	1.14959	2.22859	1.25959	1.52159		4.62469	2.58269	3.01069	1.80769	1.01669	0.941694	1.37969	1.43769	2.25769	2.61569	1.14969	2.22869	1.25969	1.52169	27.8347		0.023296	0.0130098
																																														198.519
人口数X8 2014	7.297	3.779	5.265	3.403	1.693	0.942	4.02	5.432	7.08	4.12	2.381	4.199	2.664	2.482			0.606535	0.784752	0.709473	0.803799	0.890426	0.92847	0.772543	0.701013	0.617528	0.767477	0.855572	0.763475	0.841236	0.850456		0.606635	0.784852	0.709573	0.803899	0.890526	0.92857	0.772643	0.701113	0.617628	0.767577	0.855672	0.763575	0.841336	0.850556	10.8942		0.0150113	0.0194213
人口自然变动X9 2014	7.22	15.01	9.01	12.08	-0.47	13.01	13.82	9.31	10.09	0.87	19.27	14.82	9.93	6.73			0.610436	0.215805	0.519757	0.364235	1	0.317123	0.276089	0.504559	0.465046	0.932118	0	0.225431	0.473151	0.635258		0.610536	0.215905	0.519857	0.364335	1.0001	0.317223	0.276189	0.504659	0.465146	0.932218	0.0001	0.225531	0.473251	0.635358	6.54041		0.0151078	0.00534262
总户数X10 2014	2.201	1.117	1.617	0.984	0.437	0.247	0.978	1.573	2.032	1.108	0.645	1.241	0.779	0.708			0.864691	0.919605	0.894276	0.926342	0.954053	0.963678	0.926646	0.896505	0.873252	0.920061	0.943516	0.913323	0.936727	0.940324		0.864791	0.919705	0.894376	0.926442	0.954153	0.963778	0.926746	0.896605	0.873352	0.920161	0.943616	0.913423	0.936827	0.940424	12.8744		0.0213994	0.0227583
在校学生数X11 2014	9.499	4.635	5.411	4.696	1.848	1.381	5.575	7.954	9.976	5.422	2.904	5.508	2.987	2.58			0.494985	0.741388	0.702077	0.738298	0.882573	0.906231	0.693769	0.573252	0.470821	0.70152	0.829078	0.697163	0.824873	0.845491		0.495085	0.741488	0.702177	0.738398	0.882673	0.906331	0.693869	0.573352	0.470921	0.70162	0.829178	0.697263	0.824973	0.845591	10.1029		0.012251	0.0183483
																																														40.4119
每百万人口在学人数X12 2014	13.018	12.264	10.278	13.801	10.915	14.654	13.868	14.644	14.091	13.16	12.199	13.119	11.213	10.396			12.9383	12.1843	10.1983	13.7213	10.8353	14.5743	13.7883	14.5643	14.0113	13.0803	12.1193	13.0393	11.1333	10.3163		12.9384	12.1844	10.1984	13.7214	10.8354	14.5744	13.7884	14.5644	14.0114	13.0804	12.1194	13.0394	11.1334	10.3164	176.506		0.00844708	0.00795482
每十万人口拥有的学校数量X13 2014	24.57	22.04	25.77	30.18	28.47	59.85	29.88	25.13	24.93	35.58	33.56	37.32	18.13	31.75			24.4903	21.9603	25.6903	30.1003	28.3903	59.7703	29.8003	25.0503	24.8503	35.5003	33.4803	37.2403	18.0503	31.6703		24.4904	21.9604	25.6904	30.1004	28.3904	59.7704	29.8004	25.0504	24.8504	35.5004	33.4804	37.2404	18.0504	31.6704	426.046		0.015989	0.0143373
生均财政性经费X14 2014	7.95	9.8	9.87	8.1	10.65	8.46	6.18	5.45	5.78	9.19	8.32	8.64	8.99	12.37			7.87032	9.72032	9.79032	8.02032	10.5703	8.38032	6.10032	5.37032	5.70032	9.11032	8.24032	8.56032	8.91032	12.2903		7.87042	9.72042	9.79042	8.02042	10.5704	8.38042	6.10042	5.37042	5.70042	9.11042	8.24042	8.56042	8.91042	12.2904	118.636		0.00513835	0.00634615
教师与学生比X15 2014	55.1	55.08	64.96	55.59	73.85	52.12	72.08	49.44	51.15	49.87	56.67	54.58	58.83	62.31			55.0203	55.0003	64.8803	55.5103	73.7703	52.0403	72.0003	49.3603	51.0703	49.7903	56.5903	54.5003	58.7503	62.2303		55.0204	55.0004	64.8804	55.5104	73.7704	52.0404	72.0004	49.3604	51.0704	49.7904	56.5904	54.5004	58.7504	62.2304	810.516		0.0359211	0.035908
																																														1531.7
GDP增长率X16 2014	8.7	8.5	8.3	6	12.8	10	9.8	4.6	8.3	8.1	6.3	8.1	6	7.7			8.63324	8.43324	8.23324	5.93324	12.7332	9.93324	9.73324	4.53324	8.23324	8.03324	6.23324	8.03324	5.93324	7.63324		9.88114	9.68114	9.48114	7.18114	13.9811	11.1811	10.9811	5.78114	9.48114	9.28114	7.48114	9.28114	7.18114	8.88114	129.736		0.0284391	0.0278635
城市化率X17 2014	6.105	6.427	4.177	4.216	4.905	5.272	2.83	3.45	3.541	2.987	3.48	2.857	3.134	2.994			6.03824	6.36024	4.11024	4.14924	4.83824	5.20524	2.76324	3.38324	3.47424	2.92024	3.41324	2.79024	3.06724	2.92724		7.28614	7.60814	5.35814	5.39714	6.08614	6.45314	4.01114	4.63114	4.72214	4.16814	4.66114	4.03814	4.31514	4.17514	72.911		0.0209704	0.0218972
社会消费品零售总额X18 2014	15.18	7.93	6.08	2.1	1.86	0.95	3.03	2.82	5.31	2.27	1.15	1.95	1.01	1.3			15.1132	7.86324	6.01324	2.03324	1.79324	0.88324	2.96324	2.75324	5.24324	2.20324	1.08324	1.88324	0.94324	1.23324		16.3611	9.11114	7.26114	3.28114	3.04114	2.13114	4.21114	4.00114	6.49114	3.45114	2.33114	3.13114	2.19114	2.48114	69.476		0.0470894	0.026223
城镇单位从业人员年平均工资X19 2014	5.32	4.78	4.52	3.71	4.28	4.16	4.01	4.02	4.02	4.09	4.15	3.82	4.05	3.86			5.25324	4.71324	4.45324	3.64324	4.21324	4.09324	3.94324	3.95324	3.95324	4.02324	4.08324	3.75324	3.98324	3.79324		6.50114	5.96114	5.70114	4.89114	5.46114	5.34114	5.19114	5.20114	5.20114	5.27114	5.33114	5.00114	5.23114	5.04114	75.326		0.0187111	0.0171569
																																														347.449
较上一年财政性经费增长率X20 2014	7.338	8.088	7.44	1.117	15.833	13.288	6.592	8.35	8.779	5.305	9.723	14.152	-0.996	8.682			7.36522	8.11522	7.46722	1.14422	15.8602	13.3152	6.61922	8.37722	8.80622	5.33222	9.75022	14.1792	-0.968776	8.70922		22.0596	22.8096	22.1616	15.8386	30.5546	28.0096	21.3136	23.0716	23.5006	20.0266	24.4446	28.8736	13.7256	23.4036	319.794		0.0143368	0.0148242
较上一年每万名学生所享受的财政性经费增长率X21 2014	0.773	1.745	1.375	0.238	8.568	9.622	1.182	1.05	0.88	0.978	3.348	2.569	-0.333	3.365			0.800224	1.77222	1.40222	0.265224	8.59522	9.64922	1.20922	1.07722	0.907224	1.00522	3.37522	2.59622	-0.305776	3.39222		15.4946	16.4666	16.0966	14.9596	23.2896	24.3436	15.9036	15.7716	15.6016	15.6996	18.0696	17.2906	14.3886	18.0866	241.463		0.0100701	0.0107019
平均每十万人公共图书收藏量X22 2014	4.135	4.834	2.887	3.092	3.55	4	7.664	1.546	2.49	3.604	2.705	2.749	2.804	2.958			4.16222	4.86122	2.91422	3.11922	3.57722	4.02722	7.69122	1.57322	2.51722	3.63122	2.73222	2.77622	2.83122	2.98522		18.8566	19.5556	17.6086	17.8136	18.2716	18.7216	22.3856	16.2676	17.2116	18.3256	17.4266	17.4706	17.5256	17.6796	255.121		0.0122551	0.0127094
人均城市道路面积X23 2014	14.16	11.77	11.85	14.6	21.39	35.59	31.67	18.3	14.42	17.03	11.16	9.51	21.76	11.29			14.1872	11.7972	11.8772	14.6272	21.4172	35.6172	31.6972	18.3272	14.4472	17.0572	11.1872	9.53722	21.7872	11.3172		28.8816	26.4916	26.5716	29.3216	36.1116	50.3116	46.3916	33.0216	29.1416	31.7516	25.8816	24.2316	36.4816	26.0116	450.603		0.0187705	0.0172172
平均每千人拥有卫生技术人员人数X24 2014	7.33	7.299	5.332	4.267	5.183	5.455	3.877	3.161	3.303	4.347	4.18	4.029	3.841	3.984			7.35722	7.32622	5.35922	4.29422	5.21022	5.48222	3.90422	3.18822	3.33022	4.37422	4.20722	4.05622	3.86822	4.01122		22.0516	22.0206	20.0536	18.9886	19.9046	20.1766	18.5986	17.8826	18.0246	19.0686	18.9016	18.7506	18.5626	18.7056	271.691		0.0143316	0.0143115
																																														1538.67
[truncated: 45 more columns]

## Sheet: 2015
	南宁市 Nanning	柳州市 Liuzhou	桂林市 Guilin	梧州市 Wuzhou	北海市 Beihai	防城港市 Fangcheng- gang	钦州市 Qinzhou	贵港市 Guigang	玉林市 Yulin	百色市 Baise	贺州市 Hezhou	河池市 Hechi	来宾市 Laibin	崇左市 Chongzuo		01数据的标准化处理	南宁市 Nanning	柳州市 Liuzhou	桂林市 Guilin	梧州市 Wuzhou	北海市 Beihai	防城港市 Fangcheng- gang	钦州市 Qinzhou	贵港市 Guigang	玉林市 Yulin	百色市 Baise	贺州市 Hezhou	河池市 Hechi	来宾市 Laibin	崇左市 Chongzuo	根据数据的实际情况实现平移，一般加0.0001。如果出现负数，则在最小值的绝对值基础上加0.0001作为平移量	南宁市 Nanning	柳州市 Liuzhou	桂林市 Guilin	梧州市 Wuzhou	北海市 Beihai	防城港市 Fangcheng- gang	钦州市 Qinzhou	贵港市 Guigang	玉林市 Yulin	百色市 Baise	贺州市 Hezhou	河池市 Hechi	来宾市 Laibin	崇左市 Chongzuo		p值	南宁市 Nanning	柳州市 Liuzhou
教育财政性经费X1 2015	9.249	6.697	6.6	4.304	2.495	1.4	4.182	5.094	7.387	6.016	2.941	5.344	2.873	3.399			9.21663	6.66463	6.56763	4.27163	2.46263	1.36763	4.14963	5.06163	7.35463	5.98363	2.90863	5.31163	2.84063	3.36663		9.21673	6.66473	6.56773	4.27173	2.46273	1.36773	4.14973	5.06173	7.35473	5.98373	2.90873	5.31173	2.84073	3.36673	67.5292		0.0410136	0.0296575
地区生产总值X2 2015	3.148	2.253	1.486	0.75	0.851	0.505	0.885	0.8	1.185	0.815	0.452	0.622	0.479	0.492			3.11563	2.22063	1.45363	0.71763	0.81863	0.47263	0.85263	0.76763	1.15263	0.78263	0.41963	0.58963	0.44663	0.45963		3.11573	2.22073	1.45373	0.71773	0.81873	0.47273	0.85273	0.76773	1.15273	0.78273	0.41973	0.58973	0.44673	0.45973	14.2712		0.0138647	0.00988205
人均生产总值X3 2015	4.2526	5.9051	2.8085	2.181	4.9495	5.2769	2.1906	1.457	1.6675	1.9714	1.885	1.4661	1.8003	1.9785			4.22023	5.87273	2.77613	2.14863	4.91713	5.24453	2.15823	1.42463	1.63513	1.93903	1.85263	1.43373	1.76793	1.94613		4.22033	5.87283	2.77623	2.14873	4.91723	5.24463	2.15833	1.42473	1.63523	1.93913	1.85273	1.43383	1.76803	1.94623	39.3382		0.0187801	0.0261336
城镇居民人均可支配收入X4 2015	2.911	2.818	2.81	2.555	2.751	2.758	2.728	2.489	2.884	2.496	2.522	2.224	2.707	2.463			2.87863	2.78563	2.77763	2.52263	2.71863	2.72563	2.69563	2.45663	2.85163	2.46363	2.48963	2.19163	2.67463	2.43063		2.87873	2.78573	2.77773	2.52273	2.71873	2.72573	2.69573	2.45673	2.85173	2.46373	2.48973	2.19173	2.67473	2.43073	36.6642		0.0128101	0.0123963
城镇居民人均生活消费性支出X5 2015	1.39	1.831	1.8	1.678	1.695	1.715	1.645	1.665	1.73	1.553	1.432	1.487	1.676	1.403			1.35763	1.79863	1.76763	1.64563	1.66263	1.68263	1.61263	1.63263	1.69763	1.52063	1.39963	1.45463	1.64363	1.37063		1.35773	1.79873	1.76773	1.64573	1.66273	1.68273	1.61273	1.63273	1.69773	1.52073	1.39973	1.45473	1.64373	1.37073	22.2482		0.00604178	0.00800419
公共财政预算收入X6 2015	2.971	1.467	1.345	0.924	0.476	0.521	0.503	0.426	0.972	0.73	0.29	0.315	0.303	0.501			2.93863	1.43463	1.31263	0.89163	0.44363	0.48863	0.47063	0.39363	0.93963	0.69763	0.25763	0.28263	0.27063	0.46863		2.93873	1.43473	1.31273	0.89173	0.44373	0.48873	0.47073	0.39373	0.93973	0.69773	0.25773	0.28273	0.27073	0.46873	11.2922		0.0130771	0.00638442
公共财政预算支出X7 2015	5.267	3.097	3.56	2.147	1.318	1.317	1.925	1.864	2.858	3.102	1.542	2.591	1.393	1.851			5.23463	3.06463	3.52763	2.11463	1.28563	1.28463	1.89263	1.83163	2.82563	3.06963	1.50963	2.55863	1.36063	1.81863		5.23473	3.06473	3.52773	2.11473	1.28573	1.28473	1.89273	1.83173	2.82573	3.06973	1.50973	2.55873	1.36073	1.81873	33.3802		0.0232941	0.0136378
																																														224.724
人口数X8 2015	7.402	3.816	5.29	3.439	1.72	0.956	4.041	5.489	7.107	4.132	2.398	4.245	2.658	2.488			0.46832	0.670462	0.587373	0.691714	0.788613	0.83168	0.657779	0.576156	0.484949	0.652649	0.750395	0.64628	0.735738	0.745321		0.46842	0.670562	0.587473	0.691814	0.788713	0.83178	0.657879	0.576256	0.485049	0.652749	0.750495	0.64638	0.735838	0.745421	9.28883		0.0132778	0.0190077
人口自然变动X9 2015	14.49	9.74	4.73	10.73	15.71	14.54	5.22	10.62	3.93	2.84	7.31	11.17	-2.03	2.5			0.0687711	0.336528	0.61894	0.280722	0	0.0659526	0.591319	0.286922	0.664036	0.725479	0.473506	0.255919	1	0.744645		0.0688711	0.336628	0.61904	0.280822	0.0001	0.0660526	0.591419	0.287022	0.664136	0.725579	0.473606	0.256019	1.0001	0.744745	6.11414		0.00195222	0.00954204
总户数X10 2015	2.224	1.125	1.627	0.99	0.442	0.249	0.982	1.574	2.053	1.109	0.646	1.248	0.78	0.709			0.760203	0.822153	0.793856	0.829763	0.860654	0.871533	0.830214	0.796843	0.769842	0.823055	0.849154	0.81522	0.841601	0.845603		0.760303	0.822253	0.793956	0.829863	0.860754	0.871633	0.830314	0.796943	0.769942	0.823155	0.849254	0.81532	0.841701	0.845703	11.5111		0.0215515	0.0233076
在校学生数X11 2015	9.732	4.771	5.606	4.683	2.484	1.422	5.6	7.923	10.07	4.922	3.045	5.647	3.023	2.654			0.336979	0.616629	0.56956	0.62159	0.745547	0.805411	0.569899	0.438952	0.317926	0.608117	0.713923	0.567249	0.715163	0.735964		0.337079	0.616729	0.56966	0.62169	0.745647	0.805511	0.569999	0.439052	0.318026	0.608217	0.714023	0.567349	0.715263	0.736064	8.36431		0.00955482	0.0174818
																																														35.2784
每百万人口在学人数X12 2015	13.147	12.502	10.598	13.617	14.444	14.873	13.858	14.433	14.169	11.912	12.699	13.301	11.372	10.667			13.035	12.39	10.486	13.505	14.332	14.761	13.746	14.321	14.057	11.8	12.587	13.189	11.26	10.555		13.0351	12.3901	10.4861	13.5051	14.3321	14.7611	13.7461	14.3211	14.0571	11.8001	12.5871	13.1891	11.2601	10.5551	180.025		0.00875817	0.0083248
每十万人口拥有的学校数量X13 2015	23.21	19.26	20.17	30.04	27.91	59.09	29.77	24.96	24.1	32.67	31.49	36.2	19	18.29			23.098	19.148	20.058	29.928	27.798	58.978	29.658	24.848	23.988	32.558	31.378	36.088	18.888	18.178		23.0981	19.1481	20.0581	29.9281	27.7981	58.9781	29.6581	24.8481	23.9881	32.5581	31.3781	36.0881	18.8881	18.1781	394.593		0.0155194	0.0128654
生均财政性经费X14 2015	9.5	14.04	11.77	9.19	10.04	9.85	7.47	6.43	7.34	12.22	9.66	9.46	9.5	12.81			9.388	13.928	11.658	9.078	9.928	9.738	7.358	6.318	7.228	12.108	9.548	9.348	9.388	12.698		9.3881	13.9281	11.6581	9.0781	9.9281	9.7381	7.3581	6.3181	7.2281	12.1081	9.5481	9.3481	9.3881	12.6981	137.713		0.00630778	0.00935817
教师与学生比X15 2015	55.11	57	63.84	55.67	63.61	51.05	50.38	50.02	51.39	55.27	55.19	54.36	57.11	57.57			54.998	56.888	63.728	55.558	63.498	50.938	50.268	49.908	51.278	55.158	55.078	54.248	56.998	57.458		54.9981	56.8881	63.7281	55.5581	63.4981	50.9381	50.2681	49.9081	51.2781	55.1581	55.0781	54.2481	56.9981	57.4581	776.003		0.0369528	0.0382226
																																														1488.34
GDP增长率X16 2015	8.4	7	7.8	7.5	9.4	9.2	7.8	7.1	8	7.9	7.4	3.9	3	6.2			8.33304	6.93304	7.73304	7.43304	9.33304	9.13304	7.73304	7.03304	7.93304	7.83304	7.33304	3.83304	2.93304	6.13304		9.58094	8.18094	8.98094	8.68094	10.5809	10.3809	8.98094	8.28094	9.18094	9.08094	8.58094	5.08094	4.18094	7.38094	117.133		0.0272068	0.0232312
城市化率X17 2015	6.329	6.605	4.291	4.27	4.978	5.449	2.924	3.497	3.625	3.157	3.571	3.032	3.254	3.118			6.26204	6.53804	4.22404	4.20304	4.91104	5.38204	2.85704	3.43004	3.55804	3.09004	3.50404	2.96504	3.18704	3.05104		7.50994	7.78594	5.47194	5.45094	6.15894	6.62994	4.10494	4.67794	4.80594	4.33794	4.75194	4.21294	4.43494	4.29894	74.6331		0.0213258	0.0221096
社会消费品零售总额X18 2015	16.73	8.69	6.65	2.24	2.03	1.05	2.83	2.99	5.83	2.53	1.25	2.1	1.07	1.46			16.663	8.62304	6.58304	2.17304	1.96304	0.983036	2.76304	2.92304	5.76304	2.46304	1.18304	2.03304	1.00304	1.39304		17.9109	9.87094	7.83094	3.42094	3.21094	2.23094	4.01094	4.17094	7.01094	3.71094	2.43094	3.28094	2.25094	2.64094	73.9831		0.0508613	0.0280303
城镇单位从业人员年平均工资X19 2015	6.19	5.27	5.16	4.53	4.72	4.7	4.61	4.99	4.62	4.95	5.3	5.05	5.24	4.54			6.12304	5.20304	5.09304	4.46304	4.65304	4.63304	4.54304	4.92304	4.55304	4.88304	5.23304	4.98304	5.17304	4.47304		7.37094	6.45094	6.34094	5.71094	5.90094	5.88094	5.79094	6.17094	5.80094	6.13094	6.48094	6.23094	6.42094	5.72094	86.4031		0.0209311	0.0183186
																																														352.152
较上一年财政性经费增长率X20 2015	22.536	47.381	23.526	13.174	26.778	19.863	21.429	17.536	28.202	20.755	21.781	12.292	7.042	6.485			22.4925	47.3375	23.4825	13.1305	26.7345	19.8195	21.3855	17.4925	28.1585	20.7115	21.7375	12.2485	6.99846	6.44146		37.1869	62.0319	38.1769	27.8249	41.4289	34.5139	36.0799	32.1869	42.8529	35.4059	36.4319	26.9429	21.6929	21.1359	493.892		0.021122	0.0352338
较上一年每万名学生所享受的财政性经费增长率X21 2015	2.316	9.931	4.197	2.813	10.78	13.968	3.827	2.213	2.801	4.217	7.153	2.177	2.329	2.443			2.27246	9.88746	4.15346	2.76946	10.7365	13.9245	3.78346	2.16946	2.75746	4.17346	7.10946	2.13346	2.28546	2.39946		16.9669	24.5819	18.8479	17.4639	25.4309	28.6189	18.4779	16.8639	17.4519	18.8679	21.8039	16.8279	16.9799	17.0939	276.277		0.00963709	0.0139624
平均每十万人公共图书收藏量X22 2015	4.259	5.322	2.832	3.114	3.629	4.027	7.686	1.977	2.191	4.453	2.79	2.784	3.039	3.047			4.21546	5.27846	2.78846	3.07046	3.58546	3.98346	7.64246	1.93346	2.14746	4.40946	2.74646	2.74046	2.99546	3.00346		18.9099	19.9729	17.4829	17.7649	18.2799	18.6779	22.3369	16.6279	16.8419	19.1039	17.4409	17.4349	17.6899	17.6979	256.262		0.0107407	0.0113445
人均城市道路面积X23 2015	14.31	12.02	13.45	14.04	20.7	35.87	32.89	19.22	15.25	17.72	13.71	11.67	21.63	12.74			14.2665	11.9765	13.4065	13.9965	20.6565	35.8265	32.8465	19.1765	15.2065	17.6765	13.6665	11.6265	21.5865	12.6965		28.9609	26.6709	28.1009	28.6909	35.3509	50.5209	47.5409	33.8709	29.9009	32.3709	28.3609	26.3209	36.2809	27.3909	460.332		0.0164496	0.0151489
平均每千人拥有卫生技术人员人数X24 2015	7.764	7.609	5.667	4.847	5.273	5.525	3.976	3.31	3.43	4.728	4.162	4.287	3.949	4.176			7.72046	7.56546	5.62346	4.80346	5.22946	5.48146	3.93246	3.26646	3.38646	4.68446	4.11846	4.24346	3.90546	4.13246		22.4149	22.2599	20.3179	19.4979	19.9239	20.1759	18.6269	17.9609	18.0809	19.3789	18.8129	18.9379	18.5999	18.8269	273.815		0.0127315	0.0126435
																																														1760.58
[truncated: 47 more columns]

## Sheet: 2016
	南宁市 Nanning	柳州市 Liuzhou	桂林市 Guilin	梧州市 Wuzhou	北海市 Beihai	防城港市 Fangcheng- gang	钦州市 Qinzhou	贵港市 Guigang	玉林市 Yulin	百色市 Baise	贺州市 Hezhou	河池市 Hechi	来宾市 Laibin	崇左市 Chongzuo		01数据的标准化处理	南宁市 Nanning	柳州市 Liuzhou	桂林市 Guilin	梧州市 Wuzhou	北海市 Beihai	防城港市 Fangcheng- gang	钦州市 Qinzhou	贵港市 Guigang	玉林市 Yulin	百色市 Baise	贺州市 Hezhou	河池市 Hechi	来宾市 Laibin	崇左市 Chongzuo	根据数据的实际情况实现平移，一般加0.0001。如果出现负数，则在最小值的绝对值基础上加0.0001作为平移量	南宁市 Nanning	柳州市 Liuzhou	桂林市 Guilin	梧州市 Wuzhou	北海市 Beihai	防城港市 Fangcheng- gang	钦州市 Qinzhou	贵港市 Guigang	玉林市 Yulin	百色市 Baise	贺州市 Hezhou	河池市 Hechi	来宾市 Laibin	崇左市 Chongzuo		p值	南宁市 Nanning	柳州市 Liuzhou
教育财政性经费X1 2016	9.746	6.806	7.275	4.714	2.899	1.525	4.552	5.684	8.173	6.607	3.231	5.763	3.344	3.425			9.71391	6.77391	7.24291	4.68191	2.86691	1.49291	4.51991	5.65191	8.14091	6.57491	3.19891	5.73091	3.31191	3.39291		9.71401	6.77401	7.24301	4.68201	2.86701	1.49301	4.52001	5.65201	8.14101	6.57501	3.19901	5.73101	3.31201	3.39301	73.2962	对评价 的重要性就越大	0.039954	0.0278617
地区生产总值X2 2016	3.406	2.421	1.642	0.825	0.979	0.556	0.957	0.881	1.274	0.948	0.503	0.657	0.512	0.545			3.37391	2.38891	1.60991	0.792913	0.946913	0.523913	0.924913	0.848913	1.24191	0.915913	0.470913	0.624913	0.479913	0.512913		3.37401	2.38901	1.61001	0.793013	0.947013	0.524013	0.925013	0.849013	1.24201	0.916013	0.471013	0.625013	0.480013	0.513013	15.6582		0.0138774	0.00982607
人均生产总值X3 2016	4.5308	6.2771	3.0751	2.3741	5.6141	5.717	2.34	1.587	1.7759	2.2713	2.0722	1.5335	1.9047	2.1739			4.49871	6.24501	3.04301	2.34201	5.58201	5.68491	2.30791	1.55491	1.74381	2.23921	2.04011	1.50141	1.87261	2.14181		4.49881	6.24511	3.04311	2.34211	5.58211	5.68501	2.30801	1.55501	1.74391	2.23931	2.04021	1.50151	1.87271	2.14191	42.7989		0.0185037	0.0256863
城镇居民人均可支配收入X4 2016	3.073	3.027	3.012	2.726	2.941	2.976	2.936	2.677	3.008	2.692	2.688	2.366	2.896	2.661			3.04091	2.99491	2.97991	2.69391	2.90891	2.94391	2.90391	2.64491	2.97591	2.65991	2.65591	2.33391	2.86391	2.62891		3.04101	2.99501	2.98001	2.69401	2.90901	2.94401	2.90401	2.64501	2.97601	2.66001	2.65601	2.33401	2.86401	2.62901	39.2312		0.0125078	0.0123186
城镇居民人均生活消费性支出X5 2016	1.589	1.936	1.765	1.797	1.886	1.871	1.717	1.6	1.721	1.649	1.521	1.571	1.739	1.595			1.55691	1.90391	1.73291	1.76491	1.85391	1.83891	1.68491	1.56791	1.68891	1.61691	1.48891	1.53891	1.70691	1.56291		1.55701	1.90401	1.73301	1.76501	1.85401	1.83901	1.68501	1.56801	1.68901	1.61701	1.48901	1.53901	1.70701	1.56301	23.5092		0.00640404	0.00783126
公共财政预算收入X6 2016	3.128	1.592	1.453	0.956	0.501	0.557	0.495	0.476	1.048	0.795	0.324	0.334	0.303	0.408			3.09591	1.55991	1.42091	0.923913	0.468913	0.524913	0.462913	0.443913	1.01591	0.762913	0.291913	0.301913	0.270913	0.375913		3.09601	1.56001	1.42101	0.924013	0.469013	0.525013	0.463013	0.444013	1.01601	0.763013	0.292013	0.302013	0.271013	0.376013	11.9222		0.012734	0.00641637
公共财政预算支出X7 2016	5.87	3.396	3.99	2.28	1.501	1.276	2.001	2.126	3.176	3.412	1.612	2.898	1.595	2.029			5.83791	3.36391	3.95791	2.24791	1.46891	1.24391	1.96891	2.09391	3.14391	3.37991	1.57991	2.86591	1.56291	1.99691		5.83801	3.36401	3.95801	2.24801	1.46901	1.24401	1.96901	2.09401	3.14401	3.38001	1.58001	2.86601	1.56301	1.99701	36.7142		0.0240119	0.0138363
																																														243.13
人口数X8 2016	7.517	3.857	5.34	3.475	1.743	0.972	4.091	5.549	7.173	4.172	2.425	4.286	2.686	2.505			0.556417	0.779888	0.689339	0.803212	0.908963	0.956039	0.7656	0.676578	0.577421	0.760655	0.867322	0.753694	0.851386	0.862437		0.556517	0.779988	0.689439	0.803312	0.909063	0.956139	0.7657	0.676678	0.577521	0.760755	0.867422	0.753794	0.851486	0.862537	10.8104		0.014493	0.0203127
人口自然变动X9 2016	15.55	10.61	9.43	10.32	13.78	16.63	12.45	10.84	9.27	9.63	11.38	9.54	10.23	6.99			0.0659421	0.367566	0.439614	0.385273	0.174014	0	0.25522	0.353523	0.449383	0.427403	0.320552	0.432898	0.390768	0.588594		0.0660421	0.367666	0.439714	0.385373	0.174114	0.0001	0.25532	0.353623	0.449483	0.427503	0.320652	0.432998	0.390868	0.588694	4.65215		0.00171989	0.00957488
总户数X10 2016	2.25	1.133	1.636	0.996	0.445	0.252	0.988	1.579	2.068	1.115	0.648	1.254	0.782	0.711			0.878007	0.946208	0.915496	0.954573	0.988216	1	0.955062	0.918977	0.88912	0.947307	0.975821	0.93882	0.96764	0.971975		0.878107	0.946308	0.915596	0.954673	0.988316	1.0001	0.955162	0.919077	0.88922	0.947407	0.975921	0.93892	0.96774	0.972075	13.2486		0.0228679	0.0246441
在校学生数X11 2016	10.088	4.919	5.875	4.735	2.626	1.467	5.735	7.94	10.319	5.64	3.154	5.842	3.092	2.742			0.399438	0.715045	0.656674	0.726279	0.855049	0.925815	0.665222	0.53059	0.385334	0.671022	0.822811	0.658688	0.826597	0.847967		0.399538	0.715145	0.656774	0.726379	0.855149	0.925915	0.665322	0.53069	0.385434	0.671122	0.822911	0.658788	0.826697	0.848067	9.68793		0.0104049	0.018624
																																														38.3991
每百万人口在学人数X12 2016	13.42	12.754	11.003	13.627	15.063	15.093	14.018	14.309	14.385	13.52	13.005	13.631	11.513	10.944			13.3808	12.7148	10.9638	13.5878	15.0238	15.0538	13.9788	14.2698	14.3458	13.4808	12.9658	13.5918	11.4738	10.9048		13.3809	12.7149	10.9639	13.5879	15.0239	15.0539	13.9789	14.2699	14.3459	13.4809	12.9659	13.5919	11.4739	10.9049	185.737		0.00830113	0.00788796
每十万人口拥有的学校数量X13 2016	21.66	12.45	14.98	24.58	27.48	58.13	29.45	23.14	23.31	27.3	25.94	30.31	11.13	15.97			21.6208	12.4108	14.9408	24.5408	27.4408	58.0908	29.4108	23.1008	23.2708	27.2608	25.9008	30.2708	11.0908	15.9308		21.6209	12.4109	14.9409	24.5409	27.4409	58.0909	29.4109	23.1009	23.2709	27.2609	25.9009	30.2709	11.0909	15.9309	345.282		0.013413	0.00769936
生均财政性经费X14 2016	9.66	13.84	12.38	9.96	11.04	10.4	7.94	7.16	7.92	11.71	10.24	9.86	10.82	189.64			9.62076	13.8008	12.3408	9.92076	11.0008	10.3608	7.90076	7.12076	7.88076	11.6708	10.2008	9.82076	10.7808	189.601		9.62086	13.8009	12.3409	9.92086	11.0009	10.3609	7.90086	7.12086	7.88086	11.6709	10.2009	9.82086	10.7809	189.601	322.022		0.00596852	0.00856168
教师与学生比X15 2016	57.36	58.65	61.77	56.88	53.84	50.96	50.62	39.75	51.34	50.58	55.66	53.75	60.05	58.23			57.3208	58.6108	61.7308	56.8408	53.8008	50.9208	50.5808	39.7108	51.3008	50.5408	55.6208	53.7108	60.0108	58.1908		57.3209	58.6109	61.7309	56.8409	53.8009	50.9209	50.5809	39.7109	51.3009	50.5409	55.6209	53.7109	60.0109	58.1909	758.892		0.0355603	0.0363606
																																														1611.93
GDP增长率X16 2016	6.6	7.1	6.9	7.2	7.4	8.3	8.7	7.7	7.4	8.5	8.1	4.8	3.5	7.7			6.53422	7.03422	6.83422	7.13422	7.33422	8.23422	8.63422	7.63422	7.33422	8.43422	8.03422	4.73422	3.43422	7.63422		7.78212	8.28212	8.08212	8.38212	8.58212	9.48212	9.88212	8.88212	8.58212	9.68212	9.28212	5.98212	4.68212	8.88212	116.45		0.0212772	0.0226442
城市化率X17 2016	6.566	6.751	4.365	4.304	5.06	5.618	2.969	3.568	3.67	3.266	3.666	3.119	3.35	3.219			6.50022	6.68522	4.29922	4.23822	4.99422	5.55222	2.90322	3.50222	3.60422	3.20022	3.60022	3.05322	3.28422	3.15322		7.74812	7.93312	5.54712	5.48612	6.24212	6.80012	4.15112	4.75012	4.85212	4.44812	4.84812	4.30112	4.53212	4.40112	76.0407		0.0211842	0.02169
社会消费品零售总额X18 2016	18.47	9.56	7.33	2.34	2.63	1.17	3.13	3.25	6.39	2.86	1.35	2.29	1.14	1.63			18.4042	9.49422	7.26422	2.27422	2.56422	1.10422	3.06422	3.18422	6.32422	2.79422	1.28422	2.22422	1.07422	1.56422		19.6521	10.7421	8.51212	3.52212	3.81212	2.35212	4.31212	4.43212	7.57212	4.04212	2.53212	3.47212	2.32212	2.81212	80.0897		0.0537311	0.0293701
城镇单位从业人员年平均工资X19 2016	6.62	5.88	5.63	5.01	5.21	5.01	5.13	5.19	5.12	5.46	5.86	5.72	5.65	5.13			6.55422	5.81422	5.56422	4.94422	5.14422	4.94422	5.06422	5.12422	5.05422	5.39422	5.79422	5.65422	5.58422	5.06422		7.80212	7.06212	6.81212	6.19212	6.39212	6.19212	6.31212	6.37212	6.30212	6.64212	7.04212	6.90212	6.83212	6.31212	93.1697		0.0213319	0.0193086
																																														365.75
较上一年财政性经费增长率X20 2016	5.374	1.628	10.227	9.526	16.192	8.929	8.847	11.582	10.64	9.824	9.861	7.841	16.394	0.75			5.36616	1.62016	10.2192	9.51816	16.1842	8.92116	8.83916	11.5742	10.6322	9.81616	9.85316	7.83316	16.3862	0.742164		20.0606	16.3146	24.9136	24.2126	30.8786	23.6156	23.5336	26.2686	25.3266	24.5106	24.5476	22.5276	31.0806	15.4366	333.227		0.0126815	0.0103134
较上一年每万名学生所享受的财政性经费增长率X21 2016	0.533	0.331	1.741	2.012	6.166	6.087	1.543	1.459	1.031	1.742	3.127	1.342	5.302	0.274			0.525164	0.323164	1.73316	2.00416	6.15816	6.07916	1.53516	1.45116	1.02316	1.73416	3.11916	1.33416	5.29416	0.266164		15.2196	15.0176	16.4276	16.6986	20.8526	20.7736	16.2296	16.1456	15.7176	16.4286	17.8136	16.0286	19.9886	14.9606	238.302		0.00962117	0.00949348
平均每十万人公共图书收藏量X22 2016	4.559	5.111	2.867	3.14	3.717	3.22	7.631	2.054	2.419	4.528	2.944	2.877	3.094	3.133			4.55116	5.10316	2.85916	3.13216	3.70916	3.21216	7.62316	2.04616	2.41116	4.52016	2.93616	2.86916	3.08616	3.12516		19.2456	19.7976	17.5536	17.8266	18.4036	17.9066	22.3176	16.7406	17.1056	19.2146	17.6306	17.5636	17.7806	17.8196	256.906		0.0121662	0.0125152
人均城市道路面积X23 2016	14.73	12.76	14.08	17.48	20.69	33.11	35.24	20.43	15.45	19.83	18.49	13.16	21.5	13.8			14.7222	12.7522	14.0722	17.4722	20.6822	33.1022	35.2322	20.4222	15.4422	19.8222	18.4822	13.1522	21.4922	13.7922		29.4166	27.4466	28.7666	32.1666	35.3766	47.7966	49.9266	35.1166	30.1366	34.5166	33.1766	27.8466	36.1866	28.4866	476.362		0.0185959	0.0173506
平均每千人拥有卫生技术人员人数X24 2016	8.146	7.873	5.952	5.173	5.566	5.754	4.15	3.408	3.382	4.92	4.29	4.499	4.082	4.279			8.13816	7.86516	5.94416	5.16516	5.55816	5.74616	4.14216	3.40016	3.37416	4.91216	4.28216	4.49116	4.07416	4.27116		22.8326	22.5596	20.6386	19.8596	20.2526	20.4406	18.8366	18.0946	18.0686	19.6066	18.9766	19.1856	18.7686	18.9656	277.086		0.0144338	0.0142612
																																														1581.88
[truncated: 46 more columns]

## Sheet: 2017
	南宁市 Nanning	柳州市 Liuzhou	桂林市 Guilin	梧州市 Wuzhou	北海市 Beihai	防城港市 Fangcheng- gang	钦州市 Qinzhou	贵港市 Guigang	玉林市 Yulin	百色市 Baise	贺州市 Hezhou	河池市 Hechi	来宾市 Laibin	崇左市 Chongzuo		01数据的标准化处理	南宁市 Nanning	柳州市 Liuzhou	桂林市 Guilin	梧州市 Wuzhou	北海市 Beihai	防城港市 Fangcheng- gang	钦州市 Qinzhou	贵港市 Guigang	玉林市 Yulin	百色市 Baise	贺州市 Hezhou	河池市 Hechi	来宾市 Laibin	崇左市 Chongzuo	根据数据的实际情况实现平移，一般加0.0001。如果出现负数，则在最小值的绝对值基础上加0.0001作为平移量	南宁市 Nanning	柳州市 Liuzhou	桂林市 Guilin	梧州市 Wuzhou	北海市 Beihai	防城港市 Fangcheng- gang	钦州市 Qinzhou	贵港市 Guigang	玉林市 Yulin	百色市 Baise	贺州市 Hezhou	河池市 Hechi	来宾市 Laibin	崇左市 Chongzuo		p值	南宁市 Nanning	柳州市 Liuzhou
教育财政性经费X1 2017	11.714	7.076	7.744	4.971	2.852	1.661	4.992	5.288	8.541	6.994	3.209	6.12	3.115	3.45			11.6899	7.05187	7.71987	4.94687	2.82787	1.63687	4.96787	5.26387	8.51687	6.96987	3.18487	6.09587	3.09087	3.42587		11.69	7.05197	7.71997	4.94697	2.82797	1.63697	4.96797	5.26397	8.51697	6.96997	3.18497	6.09597	3.09097	3.42597	77.3906	表明指标越重要，	0.0445215	0.0268576
地区生产总值X2 2017	3.804	2.687	1.746	0.879	1.046	0.622	1.092	0.976	1.383	1.033	0.55	0.741	0.565	0.632			3.77987	2.66287	1.72187	0.85487	1.02187	0.59787	1.06787	0.95187	1.35887	1.00887	0.52587	0.71687	0.54087	0.60787		3.77997	2.66297	1.72197	0.85497	1.02197	0.59797	1.06797	0.95197	1.35897	1.00897	0.52597	0.71697	0.54097	0.60797	17.4196		0.0143961	0.010142
人均生产总值X3 2017	5.0264	6.9505	3.2688	2.5168	5.9648	6.3653	2.6574	1.7554	1.9102	2.4726	2.2579	1.7248	2.1071	2.527			5.00227	6.92637	3.24467	2.49267	5.94067	6.34117	2.63327	1.73127	1.88607	2.44847	2.23377	1.70067	2.08297	2.50287		5.00237	6.92647	3.24477	2.49277	5.94077	6.34127	2.63337	1.73137	1.88617	2.44857	2.23387	1.70077	2.08307	2.50297	47.1686		0.0190516	0.0263796
城镇居民人均可支配收入X4 2017	3.322	3.266	3.253	2.936	3.191	3.208	3.142	2.881	3.216	2.913	2.89	2.565	3.105	2.881			3.29787	3.24187	3.22887	2.91187	3.16687	3.18387	3.11787	2.85687	3.19187	2.88887	2.86587	2.54087	3.08087	2.85687		3.29797	3.24197	3.22897	2.91197	3.16697	3.18397	3.11797	2.85697	3.19197	2.88897	2.86597	2.54097	3.08097	2.85697	42.4326		0.0125604	0.0123471
城镇居民人均生活消费性支出X5 2017	1.728	2.091	1.901	1.902	2.024	2.054	1.839	1.779	1.831	1.799	1.634	1.678	1.862	1.745			1.70387	2.06687	1.87687	1.87787	1.99987	2.02987	1.81487	1.75487	1.80687	1.77487	1.60987	1.65387	1.83787	1.72087		1.70397	2.06697	1.87697	1.87797	1.99997	2.02997	1.81497	1.75497	1.80697	1.77497	1.60997	1.65397	1.83797	1.72097	25.5306		0.00648961	0.0078721
公共财政预算收入X6 2017	3.322	1.798	1.442	0.846	0.643	0.476	0.528	0.504	1.056	0.825	0.309	0.362	0.276	0.341			3.29787	1.77387	1.41787	0.82187	0.61887	0.45187	0.50387	0.47987	1.03187	0.80087	0.28487	0.33787	0.25187	0.31687		3.29797	1.77397	1.41797	0.82197	0.61897	0.45197	0.50397	0.47997	1.03197	0.80097	0.28497	0.33797	0.25197	0.31697	12.3916		0.0125604	0.0067562
公共财政预算支出X7 2017	6.463	3.746	4.347	2.423	1.575	1.205	2.059	2.338	3.516	3.797	1.816	3.289	1.782	2.216			6.43887	3.72187	4.32287	2.39887	1.55087	1.18087	2.03487	2.31387	3.49187	3.77287	1.79187	3.26487	1.75787	2.19187		6.43897	3.72197	4.32297	2.39897	1.55097	1.18097	2.03497	2.31397	3.49197	3.77297	1.79197	3.26497	1.75797	2.19197	40.2356		0.024523	0.0141752
																																														262.569
人口数X8 2017	7.569	3.866	5.341	3.491	1.754	0.978	4.109	5.557	7.242	4.176	2.435	4.299	2.681	2.499			0.230668	0.516725	0.402781	0.545693	0.679876	0.739822	0.497953	0.386095	0.255929	0.492777	0.627269	0.483275	0.608266	0.622325		0.230768	0.516825	0.402881	0.545793	0.679976	0.739922	0.498053	0.386195	0.256029	0.492877	0.627369	0.483375	0.608366	0.622425	7.09086		0.00744437	0.0166723
人口自然变动X9 2017	6.82	2.41	0.22	4.58	6.19	6.07	4.38	1.48	9.58	0.96	4.16	2.99	-1.68	-2.39			0.288528	0.6292	0.798378	0.461568	0.337196	0.346466	0.477018	0.701043	0.0753187	0.741213	0.494013	0.584396	0.945153	1		0.288628	0.6293	0.798478	0.461668	0.337296	0.346566	0.477118	0.701143	0.0754187	0.741313	0.494113	0.584496	0.945253	1.0001	7.88089		0.00931088	0.0203006
总户数X10 2017	2.258	1.137	1.633	0.995	0.445	0.253	0.985	1.568	2.077	1.116	0.647	1.252	0.783	0.708			0.640942	0.72754	0.689224	0.738509	0.780997	0.795829	0.739282	0.694245	0.654925	0.729162	0.765392	0.718656	0.754886	0.76068		0.641042	0.72764	0.689324	0.738609	0.781097	0.795929	0.739382	0.694345	0.655025	0.729262	0.765492	0.718756	0.754986	0.76078	10.1917		0.0206794	0.023473
在校学生数X11 2017	10.555	5.071	6.104	4.805	2.717	1.529	5.868	8.101	6.485	5.739	3.283	6.019	3.164	2.806			0	0.423638	0.343839	0.444187	0.605485	0.697258	0.36207	0.189571	0.314407	0.372036	0.561761	0.350406	0.570954	0.59861		0.0001	0.423738	0.343939	0.444287	0.605585	0.697358	0.36217	0.189671	0.314507	0.372136	0.561861	0.350506	0.571054	0.59871	5.83562		3.22591e-06	0.0136694
																																														30.999
每百万人口在学人数X12 2017	13.946	13.117	11.429	13.766	15.489	15.636	14.28	14.578	8.955	13.744	13.481	14.002	11.801	11.227			13.845	13.016	11.328	13.665	15.388	15.535	14.179	14.477	8.85403	13.643	13.38	13.901	11.7	11.126		13.8451	13.0161	11.3281	13.6651	15.3881	15.5351	14.1791	14.4771	8.85413	13.6431	13.3801	13.9011	11.7001	11.1261	184.039		0.00943249	0.00886771
每十万人口拥有的学校数量X13 2017	20.16	12.73	14.47	23.12	23.83	57.67	27.43	19.25	18.49	38.13	17.21	20.89	11.26	14.12			20.059	12.629	14.369	23.019	23.729	57.569	27.329	19.149	18.389	38.029	17.109	20.789	11.159	14.019		20.0591	12.6291	14.3691	23.0191	23.7291	57.5691	27.3291	19.1491	18.3891	38.0291	17.1091	20.7891	11.1591	14.0191	317.348		0.013666	0.00860405
生均财政性经费X14 2017	11.1	13.95	12.69	10.35	10.5	10.86	8.51	6.53	13.17	12.19	9.77	10.17	9.85	12.3			10.999	13.849	12.589	10.249	10.399	10.759	8.40903	6.42903	13.069	12.089	9.66903	10.069	9.74903	12.199		10.9991	13.8491	12.5891	10.2491	10.3991	10.7591	8.40913	6.42913	13.0691	12.0891	9.66913	10.0691	9.74913	12.1991	150.528		0.00749355	0.00943522
教师与学生比X15 2017	59.03	59.62	67.33	58.34	56.3	57.46	71.2	54.36	47.86	55.31	58.02	53.36	59.24	59.88			58.929	59.519	67.229	58.239	56.199	57.359	71.099	54.259	47.759	55.209	57.919	53.259	59.139	59.779		58.9291	59.5191	67.2291	58.2391	56.1991	57.3591	71.0991	54.2591	47.7591	55.2091	57.9191	53.2591	59.1391	59.7791	815.898		0.0401476	0.0405496
																																														1467.81
GDP增长率X16 2017	8	7	3.9	6	10.2	6.5	8.3	8.9	7	8.5	5.3	7.7	7.1	8.8			7.93406	6.93406	3.83406	5.93406	10.1341	6.43406	8.23406	8.83406	6.93406	8.43406	5.23406	7.63406	7.03406	8.73406		9.18196	8.18196	5.08196	7.18196	11.382	7.68196	9.48196	10.082	8.18196	9.68196	6.48196	8.88196	8.28196	9.98196	119.747		0.0238113	0.021218
城市化率X17 2017	6.89	6.963	4.509	4.386	5.219	5.825	3.075	3.65	3.728	3.403	3.775	3.23	3.488	3.353			6.82406	6.89706	4.44306	4.32006	5.15306	5.75906	3.00906	3.58406	3.66206	3.33706	3.70906	3.16406	3.42206	3.28706		8.07196	8.14496	5.69096	5.56796	6.40096	7.00696	4.25696	4.83196	4.90996	4.58496	4.95696	4.41196	4.66996	4.53496	78.0414		0.0209328	0.0211221
社会消费品零售总额X18 2017	20.53	10.55	8.08	2.52	2.96	1.31	3.41	3.56	7.04	3.27	1.49	2.55	1.27	1.86			20.4641	10.4841	8.01406	2.45406	2.89406	1.24406	3.34406	3.49406	6.97406	3.20406	1.42406	2.48406	1.20406	1.79406		21.712	11.732	9.26196	3.70196	4.14196	2.49196	4.59196	4.74196	8.22196	4.45196	2.67196	3.73196	2.45196	3.04196	86.9474		0.0563049	0.0304241
城镇单位从业人员年平均工资X19 2017	7.28	6.34	6.21	5.49	5.69	5.79	5.58	5.8	5.86	6.21	6.19	6.19	6.04	5.66			7.21406	6.27406	6.14406	5.42406	5.62406	5.72406	5.51406	5.73406	5.79406	6.14406	6.12406	6.12406	5.97406	5.59406		8.46196	7.52196	7.39196	6.67196	6.87196	6.97196	6.76196	6.98196	7.04196	7.39196	7.37196	7.37196	7.22196	6.84196	100.877		0.0219441	0.0195065
																																														385.614
较上一年财政性经费增长率X20 2017	20.193	3.967	6.447	5.452	-1.621	8.918	9.666	-6.967	4.503	5.857	-0.681	6.195	-6.848	0.745			20.3541	4.1281	6.6081	5.6131	-1.4599	9.0791	9.8271	-6.8059	4.6641	6.0181	-0.519902	6.3561	-6.6869	0.906098		35.0485	18.8225	21.3025	20.3075	13.2345	23.7735	24.5215	7.8885	19.3585	20.7125	14.1745	21.0505	8.0075	15.6005	263.803		0.0229924	0.0123479
较上一年每万名学生所享受的财政性经费增长率X21 2017	1.913	0.782	1.056	1.135	-0.597	5.833	1.647	-0.86	0.694	1.021	-0.207	1.029	-2.164	0.266			2.0741	0.943098	1.2171	1.2961	-0.435902	5.9941	1.8081	-0.698902	0.855098	1.1821	-0.0459021	1.1901	-2.0029	0.427098		16.7685	15.6375	15.9115	15.9905	14.2585	20.6885	16.5025	13.9955	15.5495	15.8765	14.6485	15.8845	12.6915	15.1215	219.525		0.0110004	0.0102585
平均每十万人公共图书收藏量X22 2017	4.059	4.982	2.925	3.191	3.842	4.581	7.731	2.179	2.477	4.761	3.088	2.933	3.42	3.277			4.2201	5.1431	3.0861	3.3521	4.0031	4.7421	7.8921	2.3401	2.6381	4.9221	3.2491	3.0941	3.5811	3.4381		18.9145	19.8375	17.7805	18.0465	18.6975	19.4365	22.5865	17.0345	17.3325	19.6165	17.9435	17.7885	18.2755	18.1325	261.423		0.0124082	0.0130138
人均城市道路面积X23 2017	14.33	13.57	16	17.96	20.52	31.11	36.28	22.7	15.75	20.29	18.62	23.46	20.19	17.92			14.4911	13.7311	16.1611	18.1211	20.6811	31.2711	36.4411	22.8611	15.9111	20.4511	18.7811	23.6211	20.3511	18.0811		29.1855	28.4255	30.8555	32.8155	35.3755	45.9655	51.1355	37.5555	30.6055	35.1455	33.4755	38.3155	35.0455	32.7755	496.677		0.0191462	0.0186476
平均每千人拥有卫生技术人员人数X24 2017	8.673	8.237	6.153	5.371	5.732	5.902	4.394	3.602	3.679	5.181	4.457	4.785	4.309	4.469			8.8341	8.3981	6.3141	5.5321	5.8931	6.0631	4.5551	3.7631	3.8401	5.3421	4.6181	4.9461	4.4701	4.6301		23.5285	23.0925	21.0085	20.2265	20.5875	20.7575	19.2495	18.4575	18.5345	20.0365	19.3125	19.6405	19.1645	19.3245	282.921		0.0154351	0.0151491
																																														1524.35
[truncated: 45 more columns]

## Sheet: 2018
	南宁市 Nanning	柳州市 Liuzhou	桂林市 Guilin	梧州市 Wuzhou	北海市 Beihai	防城港市 Fangcheng- gang	钦州市 Qinzhou	贵港市 Guigang	玉林市 Yulin	百色市 Baise	贺州市 Hezhou	河池市 Hechi	来宾市 Laibin	崇左市 Chongzuo		01数据的标准化处理	南宁市 Nanning	柳州市 Liuzhou	桂林市 Guilin	梧州市 Wuzhou	北海市 Beihai	防城港市 Fangcheng- gang	钦州市 Qinzhou	贵港市 Guigang	玉林市 Yulin	百色市 Baise	贺州市 Hezhou	河池市 Hechi	来宾市 Laibin	崇左市 Chongzuo	根据数据的实际情况实现平移，一般加0.0001。如果出现负数，则在最小值的绝对值基础上加0.0001作为平移量	南宁市 Nanning	柳州市 Liuzhou	桂林市 Guilin	梧州市 Wuzhou	北海市 Beihai	防城港市 Fangcheng- gang	钦州市 Qinzhou	贵港市 Guigang	玉林市 Yulin	百色市 Baise	贺州市 Hezhou	河池市 Hechi	来宾市 Laibin	崇左市 Chongzuo		p值	南宁市 Nanning	柳州市 Liuzhou
教育财政性经费X12018	12.955	7.331	7.28	4.747	3.094	1.587	5.359	6.205	8.71	7.084	3.374	6.071	3.279	3.381			12.9331	7.30907	7.25807	4.72507	3.07207	1.56507	5.33707	6.18307	8.68807	7.06207	3.35207	6.04907	3.25707	3.35907		12.9332	7.30917	7.25817	4.72517	3.07217	1.56517	5.33717	6.18317	8.68817	7.06217	3.35217	6.04917	3.25717	3.35917	80.1514	指标权重值越大，	0.0462024	0.0261112
地区生产总值X2 2018	4.162	3.008	1.901	0.932	1.187	0.662	1.214	1.116	1.504	1.124	0.61	0.805	0.615	0.693			4.14007	2.98607	1.87907	0.910071	1.16507	0.640071	1.19207	1.09407	1.48207	1.10207	0.588071	0.783071	0.593071	0.671071		4.14017	2.98617	1.87917	0.910171	1.16517	0.640171	1.19217	1.09417	1.48217	1.10217	0.588171	0.783171	0.593171	0.671171	19.2274		0.0147903	0.0106678
人均生产总值X3 2018	5.3999	7.7043	3.5327	2.6492	6.6599	6.6662	2.9235	1.9874	2.052	2.671	2.4799	1.8594	2.2847	2.7536			5.37797	7.68237	3.51077	2.62727	6.63797	6.64427	2.90157	1.96547	2.03007	2.64907	2.45797	1.83747	2.26277	2.73167		5.37807	7.68247	3.51087	2.62737	6.63807	6.64437	2.90167	1.96557	2.03017	2.64917	2.45807	1.83757	2.26287	2.73177	51.3181		0.0192126	0.0274448
城镇居民人均可支配收入X42018	3.528	3.485	3.465	3.121	3.433	3.433	3.349	3.051	3.396	3.061	3.086	2.747	3.291	3.092			3.50607	3.46307	3.44307	3.09907	3.41107	3.41107	3.32707	3.02907	3.37407	3.03907	3.06407	2.72507	3.26907	3.07007		3.50617	3.46317	3.44317	3.09917	3.41117	3.41117	3.32717	3.02917	3.37417	3.03917	3.06417	2.72517	3.26917	3.07017	45.2324		0.0125254	0.0123718
城镇居民人均生活消费性支出X5 2018	1.872	2.242	2.047	2.122	2.115	2.275	1.951	1.933	1.96	1.901	1.756	1.83	1.933	1.881			1.85007	2.22007	2.02507	2.10007	2.09307	2.25307	1.92907	1.91107	1.93807	1.87907	1.73407	1.80807	1.91107	1.85907		1.85017	2.22017	2.02517	2.10017	2.09317	2.25317	1.92917	1.91117	1.93817	1.87917	1.73417	1.80817	1.91117	1.85917	27.5124		0.00660954	0.00793132
公共财政预算收入X6 2018	3.59	1.938	1.509	0.8	0.717	0.44	0.541	0.572	1.061	0.847	0.325	0.399	0.278	0.311			3.56807	1.91607	1.48707	0.778071	0.695071	0.418071	0.519071	0.550071	1.03907	0.825071	0.303071	0.377071	0.256071	0.289071		3.56817	1.91617	1.48717	0.778171	0.695171	0.418171	0.519171	0.550171	1.03917	0.825171	0.303171	0.377171	0.256171	0.289171	13.0224		0.0127469	0.00684531
公共财政预算支出X7 2018	6.98	4.244	4.559	2.616	1.755	1.273	2.221	2.638	3.68	3.937	1.928	3.522	1.838	2.575			6.95807	4.22207	4.53707	2.59407	1.73307	1.25107	2.19907	2.61607	3.65807	3.91507	1.90607	3.50007	1.81607	2.55307		6.95817	4.22217	4.53717	2.59417	1.73317	1.25117	2.19917	2.61617	3.65817	3.91517	1.90617	3.50017	1.81617	2.55317	43.4604		0.0248573	0.0150833
																																														279.924
人口数X8 2018	7.708	3.905	5.382	3.52	1.782	0.993	4.154	5.613	7.327	4.21	2.459	4.33	2.693	2.517			0.589964	0.799219	0.717949	0.820403	0.916034	0.959448	0.785518	0.705238	0.610928	0.782436	0.878783	0.775834	0.865907	0.875592		0.590064	0.799319	0.718049	0.820503	0.916134	0.959548	0.785618	0.705338	0.611028	0.782536	0.878883	0.775934	0.866007	0.875692	11.0847		0.0145752	0.019744
人口自然变动X9 2018	18.43	10.01	7.62	8.39	15.73	15.65	10.83	10.04	11.79	8.12	9.77	7.16	4.55	7.04			0	0.463299	0.594806	0.552438	0.148564	0.152966	0.41818	0.461649	0.365357	0.567294	0.476505	0.620117	0.763728	0.626719		0.0001	0.463399	0.594906	0.552538	0.148664	0.153066	0.41828	0.461749	0.365457	0.567394	0.476605	0.620217	0.763828	0.626819	6.21302		2.4701e-06	0.0114464
总户数X10 2018	2.307	1.148	1.645	0.998	0.451	0.256	0.996	1.596	2.093	1.115	0.65	1.255	0.785	0.71			0.887146	0.950919	0.923572	0.959172	0.98927	1	0.959282	0.926268	0.898922	0.952735	0.978321	0.945031	0.970892	0.975019		0.887246	0.951019	0.923672	0.959272	0.98937	1.0001	0.959382	0.926368	0.899022	0.952835	0.978421	0.945131	0.970992	0.975119	13.318		0.0219159	0.0234911
在校学生数X11 2018	10.933	5.269	6.36	4.947	2.396	1.608	6.129	8.306	11.074	5.841	3.475	6.183	3.281	2.893			0.412512	0.724166	0.664136	0.741884	0.882249	0.925608	0.676846	0.55706	0.404754	0.692693	0.822879	0.673875	0.833553	0.854903		0.412612	0.724266	0.664236	0.741984	0.882349	0.925708	0.676946	0.55716	0.404854	0.692793	0.822979	0.673975	0.833653	0.855003	9.86852		0.010192	0.0178901
																																														40.4841
每百万人口在学人数X12 2018	14.184	13.494	11.818	14.054	13.447	16.19	14.756	14.798	15.113	13.875	14.131	14.281	12.182	11.494			14.0576	13.3676	11.6916	13.9276	13.3206	16.0636	14.6296	14.6716	14.9866	13.7486	14.0046	14.1546	12.0556	11.3676		14.0577	13.3677	11.6917	13.9277	13.3207	16.0637	14.6297	14.6717	14.9867	13.7487	14.0047	14.1547	12.0557	11.3677	192.048		0.00977746	0.00929755
每十万人口拥有的学校数量X13 2018	18.75	12.55	13.81	18.58	22.28	56.58	27.28	18.92	21.18	15.06	16.96	19.96	11.14	14.18			18.6236	12.4236	13.6836	18.4536	22.1536	56.4536	27.1536	18.7936	21.0536	14.9336	16.8336	19.8336	11.0136	14.0536		18.6237	12.4237	13.6837	18.4537	22.1537	56.4537	27.1537	18.7937	21.0537	14.9337	16.8337	19.8337	11.0137	14.0537	285.461		0.0129532	0.00864097
生均财政性经费X14 2018	11.85	13.91	11.45	9.6	12.91	9.87	8.74	7.47	7.87	12.13	9.71	9.82	9.99	11.69			11.7236	13.7836	11.3236	9.47356	12.7836	9.74356	8.61356	7.34356	7.74356	12.0036	9.58356	9.69356	9.86356	11.5636		11.7237	13.7837	11.3237	9.47366	12.7837	9.74366	8.61366	7.34366	7.74366	12.0037	9.58366	9.69366	9.86366	11.5637	145.241		0.0081541	0.00958689
教师与学生比X15 2018	60.84	59.76	61.77	60.03	66.55	58.1	54.78	54.96	52.73	57.35	57.76	55.17	57.69	59.29			60.7136	59.6336	61.6436	59.9036	66.4236	57.9736	54.6536	54.8336	52.6036	57.2236	57.6336	55.0436	57.5636	59.1636		60.7137	59.6337	61.6437	59.9037	66.4237	57.9737	54.6537	54.8337	52.6037	57.2237	57.6337	55.0437	57.5637	59.1637	815.011		0.0422279	0.0414767
																																														1437.76
GDP增长率X16 2018	5.4	6.4	6.9	1.8	8	7.2	6	10	7.1	7.1	8.9	6.4	7.2	10.2			5.33518	6.33518	6.83518	1.73518	7.93518	7.13518	5.93518	9.93518	7.03518	7.03518	8.83518	6.33518	7.13518	10.1352		6.58308	7.58308	8.08308	2.98308	9.18308	8.38308	7.18308	11.1831	8.28308	8.28308	10.0831	7.58308	8.38308	11.3831	115.163		0.0165645	0.0190807
城市化率X17 2018	7.111	7.083	4.597	4.435	5.267	5.97	3.145	3.697	3.779	3.476	3.844	3.336	3.539	3.44			7.04618	7.01818	4.53218	4.37018	5.20218	5.90518	3.08018	3.63218	3.71418	3.41118	3.77918	3.27118	3.47418	3.37518		8.29408	8.26608	5.78008	5.61808	6.45008	7.15308	4.32808	4.88008	4.96208	4.65908	5.02708	4.51908	4.72208	4.62308	79.2821		0.0208697	0.0207993
社会消费品零售总额X18 2018	22.34	11.52	8.79	2.66	3.22	1.43	3.7	3.76	7.76	3.59	1.62	2.78	1.36	2.1			22.2752	11.4552	8.72518	2.59518	3.15518	1.36518	3.63518	3.69518	7.69518	3.52518	1.55518	2.71518	1.29518	2.03518		23.5231	12.7031	9.97308	3.84308	4.40308	2.61308	4.88308	4.94308	8.94308	4.77308	2.80308	3.96308	2.54308	3.28308	93.1931		0.0591893	0.0319638
城镇单位从业人员年平均工资X19 2018	8.03	7	6.93	6.18	6.48	6.75	6.08	6.46	6.39	6.7	6.66	6.73	6.55	6.28			7.96518	6.93518	6.86518	6.11518	6.41518	6.68518	6.01518	6.39518	6.32518	6.63518	6.59518	6.66518	6.48518	6.21518		9.21308	8.18308	8.11308	7.36308	7.66308	7.93308	7.26308	7.64308	7.57308	7.88308	7.84308	7.91308	7.73308	7.46308	109.783		0.0231821	0.0205904
																																														397.421
较上一年财政性经费增长率X20 2018	10.594	3.604	-5.992	-4.506	8.485	-4.455	7.352	17.341	1.979	1.287	5.142	-0.801	5.265	-2			10.7306	3.74061	-5.85539	-4.36939	8.62161	-4.31839	7.48861	17.4776	2.11561	1.42361	5.27861	-0.66439	5.40161	-1.86339		25.425	18.435	8.83901	10.325	23.316	10.376	22.183	32.172	16.81	16.118	19.973	14.03	20.096	12.831	250.929		0.0163499	0.0118549
较上一年每万名学生所享受的财政性经费增长率X21 2018	0.969	0.684	-0.942	-0.911	3.541	-2.771	1.2	2.088	0.179	0.22	1.48	-0.13	1.605	-0.691			1.10561	0.82061	-0.80539	-0.77439	3.67761	-2.63439	1.33661	2.22461	0.31561	0.35661	1.61661	0.00661028	1.74161	-0.55439		15.8	15.515	13.889	13.92	18.372	12.06	16.031	16.919	15.01	15.051	16.311	14.701	16.436	14.14	214.155		0.0101604	0.00997716
平均每十万人公共图书收藏量X22 2018	3.858	5.24	2.964	3.21	4.041	9.283	1.955	2.209	2.631	5.019	3.481	3	3.691	3.401			3.99461	5.37661	3.10061	3.34661	4.17761	9.41961	2.09161	2.34561	2.76761	5.15561	3.61761	3.13661	3.82761	3.53761		18.689	20.071	17.795	18.041	18.872	24.114	16.786	17.04	17.462	19.85	18.312	17.831	18.522	18.232	261.617		0.0120182	0.012907
人均城市道路面积X23 2018	13.87	16.16	18.83	17.84	26.25	34.56	37.87	31.26	16.31	25.56	30.46	24.46	23.27	18.61			14.0066	16.2966	18.9666	17.9766	26.3866	34.6966	38.0066	31.3966	16.4466	25.6966	30.5966	24.5966	23.4066	18.7466		28.701	30.991	33.661	32.671	41.081	49.391	52.701	46.091	31.141	40.391	45.291	39.291	38.101	33.441	542.944		0.0184566	0.0199292
平均每千人拥有卫生技术人员人数X24 2018	8.968	8.537	6.349	5.536	6.029	6.017	4.61	3.712	3.928	5.413	4.646	4.967	4.488	4.573			9.10461	8.67361	6.48561	5.67261	6.16561	6.15361	4.74661	3.84861	4.06461	5.54961	4.78261	5.10361	4.62461	4.70961		23.799	23.368	21.18	20.367	20.86	20.848	19.441	18.543	18.759	20.244	19.477	19.798	19.319	19.404	285.407		0.0153043	0.0150271
																																														1555.05
[truncated: 45 more columns]

## Sheet: 2019
	南宁市 Nanning	柳州市 Liuzhou	桂林市 Guilin	梧州市 Wuzhou	北海市 Beihai	防城港市 Fangcheng- gang	钦州市 Qinzhou	贵港市 Guigang	玉林市 Yulin	百色市 Baise	贺州市 Hezhou	河池市 Hechi	来宾市 Laibin	崇左市 Chongzuo		01数据的标准化处理	南宁市 Nanning	柳州市 Liuzhou	桂林市 Guilin	梧州市 Wuzhou	北海市 Beihai	防城港市 Fangcheng- gang	钦州市 Qinzhou	贵港市 Guigang	玉林市 Yulin	百色市 Baise	贺州市 Hezhou	河池市 Hechi	来宾市 Laibin	崇左市 Chongzuo	根据数据的实际情况实现平移，一般加0.0001。如果出现负数，则在最小值的绝对值基础上加0.0001作为平移量	南宁市 Nanning	柳州市 Liuzhou	桂林市 Guilin	梧州市 Wuzhou	北海市 Beihai	防城港市 Fangcheng- gang	钦州市 Qinzhou	贵港市 Guigang	玉林市 Yulin	百色市 Baise	贺州市 Hezhou	河池市 Hechi	来宾市 Laibin	崇左市 Chongzuo		p值	南宁市 Nanning	柳州市 Liuzhou
教育财政性经费X1 2019	14.116	7.917	7.657	5.752	3.702	1.987	5.049	6.403	9.41	8.098	3.899	6.528	3.166	3.785			14.0915	7.89254	7.63254	5.72754	3.67754	1.96254	5.02454	6.37854	9.38554	8.07354	3.87454	6.50354	3.14154	3.76054		14.0916	7.89264	7.63264	5.72764	3.67764	1.96264	5.02464	6.37864	9.38564	8.07364	3.87464	6.50364	3.14164	3.76064	87.128	即指标 权重	0.0463121	0.0259391
地区生产总值X2 2019	4.507	3.127	2.106	0.991	1.301	0.701	1.356	1.258	1.68	1.258	0.7	0.878	0.654	0.757			4.48254	3.10254	2.08154	0.966542	1.27654	0.676542	1.33154	1.23354	1.65554	1.23354	0.675542	0.853542	0.629542	0.732542		4.48264	3.10264	2.08164	0.966642	1.27664	0.676642	1.33164	1.23364	1.65564	1.23364	0.675642	0.853642	0.629642	0.732642	20.933		0.0147322	0.0101968
人均生产总值X3 2019	5.7631	7.9458	3.8949	2.8061	7.2182	6.9865	3.2473	2.2274	2.2793	2.9757	2.8277	2.0242	2.4247	3.002			5.73864	7.92134	3.87044	2.78164	7.19374	6.96204	3.22284	2.20294	2.25484	2.95124	2.80324	1.99974	2.40024	2.97754		5.73874	7.92144	3.87054	2.78174	7.19384	6.96214	3.22294	2.20304	2.25494	2.95134	2.80334	1.99984	2.40034	2.97764	55.2819		0.0188603	0.0260338
城镇居民人均可支配收入X4 2019	3.768	3.736	3.718	3.352	3.66	3.639	3.573	3.292	3.613	3.278	3.318	2.967	3.495	3.33			3.74354	3.71154	3.69354	3.32754	3.63554	3.61454	3.54854	3.26754	3.58854	3.25354	3.29354	2.94254	3.47054	3.30554		3.74364	3.71164	3.69364	3.32764	3.63564	3.61464	3.54864	3.26764	3.58864	3.25364	3.29364	2.94264	3.47064	3.30564	48.398		0.0123034	0.0121983
城镇居民人均生活消费性支出X5 2019	2.014	2.402	2.245	2.36	2.288	2.482	2.09	2.103	2.154	1.998	1.874	1.959	2.02	2.029			1.98954	2.37754	2.22054	2.33554	2.26354	2.45754	2.06554	2.07854	2.12954	1.97354	1.84954	1.93454	1.99554	2.00454		1.98964	2.37764	2.22064	2.33564	2.26364	2.45764	2.06564	2.07864	2.12964	1.97364	1.84964	1.93464	1.99564	2.00464	29.677		0.00653894	0.0078141
公共财政预算收入X6 2019	3.709	2.215	1.528	0.846	0.781	0.474	0.574	0.627	1.111	0.94	0.362	0.46	0.344	0.337			3.68454	2.19054	1.50354	0.821542	0.756542	0.449542	0.549542	0.602542	1.08654	0.915542	0.337542	0.435542	0.319542	0.312542		3.68464	2.19064	1.50364	0.821642	0.756642	0.449642	0.549642	0.602642	1.08664	0.915642	0.337642	0.435642	0.319642	0.312642	13.967		0.0121095	0.00719953
公共财政预算支出X7 2019	7.892	4.989	4.957	2.937	2.005	1.395	2.251	2.93	4.19	4.787	2.201	3.903	1.894	2.901			7.86754	4.96454	4.93254	2.91254	1.98054	1.37054	2.22654	2.90554	4.16554	4.76254	2.17654	3.87854	1.86954	2.87654		7.86764	4.96464	4.93264	2.91264	1.98064	1.37064	2.22664	2.90564	4.16564	4.76264	2.17664	3.87864	1.86964	2.87664	48.891		0.0258569	0.0163163
																																														304.276
人口数X8 2019	7.82	3.935	5.406	3.533	1.802	1.004	4.177	5.646	7.37	4.227	2.476	4.338	2.698	2.523			0.467914	0.741275	0.637771	0.769561	0.891359	0.947509	0.724247	0.620884	0.499578	0.720729	0.843935	0.712919	0.828314	0.840628		0.468014	0.741375	0.637871	0.769661	0.891459	0.947609	0.724347	0.620984	0.499678	0.720829	0.844035	0.713019	0.828414	0.840728	10.248		0.011821	0.0187255
人口自然变动X9 2019	14.47	7.81	4.55	3.72	11.39	10.57	5.51	5.86	5.79	4.09	6.83	1.96	1.71	2.46			0	0.468618	0.698002	0.756403	0.216718	0.274416	0.630453	0.605826	0.610751	0.730369	0.537574	0.880242	0.897833	0.845061		0.0001	0.468718	0.698102	0.756503	0.216818	0.274516	0.630553	0.605926	0.610851	0.730469	0.537674	0.880342	0.897933	0.845161	8.15367		2.52578e-06	0.0118388
总户数X10 2019	2.36	1.157	1.657	0.999	0.456	0.258	1	1.581	2.098	1.101	0.654	1.254	0.79	0.71			0.852097	0.936744	0.901562	0.947861	0.986068	1	0.947791	0.90691	0.870532	0.940684	0.972136	0.929918	0.962567	0.968196		0.852197	0.936844	0.901662	0.947961	0.986168	1.0001	0.947891	0.90701	0.870632	0.940784	0.972236	0.930018	0.962667	0.968296	13.1245		0.0215247	0.0236627
在校学生数X11 2019	11.823	5.469	6.63	4.553	2.867	1.693	12.573	8.487	11.557	5.932	3.655	6.34	3.395	2.999			0.186251	0.633338	0.551646	0.697791	0.816423	0.899029	0.133479	0.420982	0.204968	0.60076	0.760977	0.572052	0.779271	0.807135		0.186351	0.633438	0.551746	0.697891	0.816523	0.899129	0.133579	0.421082	0.205068	0.60086	0.761077	0.572152	0.779371	0.807235	8.0655		0.00470683	0.0159993
																																														39.5917
每百万人口在学人数X12 2019	15.12	13.898	12.264	12.887	15.909	16.868	30.103	15.032	15.682	14.034	14.762	14.615	12.584	11.886			15.0507	13.8287	12.1947	12.8177	15.8397	16.7987	30.0337	14.9627	15.6127	13.9647	14.6927	14.5457	12.5147	11.8167		15.0508	13.8288	12.1948	12.8178	15.8398	16.7988	30.0338	14.9628	15.6128	13.9648	14.6928	14.5458	12.5148	11.8168	214.675		0.0105654	0.00970756
每十万人口拥有的学校数量X13 2019	18.52	12.88	13.89	18.34	23.58	55.99	27.15	18.33	21.21	13.93	17.17	20.31	11.12	14.43			18.4507	12.8107	13.8207	18.2707	23.5107	55.9207	27.0807	18.2607	21.1407	13.8607	17.1007	20.2407	11.0507	14.3607		18.4508	12.8108	13.8208	18.2708	23.5108	55.9208	27.0808	18.2608	21.1408	13.8608	17.1008	20.2408	11.0508	14.3608	285.881		0.0129521	0.00899294
生均财政性经费X14 2019	11.94	14.48	11.55	12.63	12.91	11.74	4.02	7.54	8.14	13.65	10.67	10.3	9.33	12.62			11.8707	14.4107	11.4807	12.5607	12.8407	11.6707	3.95068	7.47068	8.07068	13.5807	10.6007	10.2307	9.26068	12.5507		11.8708	14.4108	11.4808	12.5608	12.8408	11.6708	3.95078	7.47078	8.07078	13.5808	10.6008	10.2308	9.26078	12.5508	150.551		0.00833307	0.0101161
教师与学生比X15 2019	59.26	60.12	62.01	58.95	38.78	58.38	41.97	55.02	52.32	57.88	58.36	55.23	56.63	59.49			59.1907	60.0507	61.9407	58.8807	38.7107	58.3107	41.9007	54.9507	52.2507	57.8107	58.2907	55.1607	56.5607	59.4207		59.1908	60.0508	61.9408	58.8808	38.7108	58.3108	41.9008	54.9508	52.2508	57.8108	58.2908	55.1608	56.5608	59.4208	773.431		0.0415509	0.0421546
																																														1424.54
GDP增长率X16 2019	5	2.4	6.5	4.2	8.1	5.4	7.8	9	7.2	9	11.8	6	4.3	8			4.93309	2.33309	6.43309	4.13309	8.03309	5.33309	7.73309	8.93309	7.13309	8.93309	11.7331	5.93309	4.23309	7.93309		6.18099	3.58099	7.68099	5.38099	9.28099	6.58099	8.98099	10.181	8.38099	10.181	12.981	7.18099	5.48099	9.18099	111.234		0.0151488	0.00877652
城市化率X17 2019	7.381	7.203	4.686	4.448	5.328	6.151	3.233	3.756	3.84	3.536	3.891	3.403	3.632	3.526			7.31409	7.13609	4.61909	4.38109	5.26109	6.08409	3.16609	3.68909	3.77309	3.46909	3.82409	3.33609	3.56509	3.45909		8.56199	8.38399	5.86699	5.62899	6.50899	7.33199	4.41399	4.93699	5.02099	4.71699	5.07199	4.58399	4.81299	4.70699	80.5478		0.0209843	0.020548
社会消费品零售总额X18 2019	23.28	13.33	9.67	3.01	3.45	1.49	4.01	4.12	7.36	3.87	1.73	2.97	1.46	2.27			23.2131	13.2631	9.60309	2.94309	3.38309	1.42309	3.94309	4.05309	7.29309	3.80309	1.66309	2.90309	1.39309	2.20309		24.461	14.511	10.851	4.19099	4.63099	2.67099	5.19099	5.30099	8.54099	5.05099	2.91099	4.15099	2.64099	3.45099	98.5538		0.0599506	0.0355645
城镇单位从业人员年平均工资X19 2019	8.66	7.51	7.43	6.67	7.03	7.59	6.59	7.11	6.97	7.44	7.12	7.5	6.71	6.82			8.59309	7.44309	7.36309	6.60309	6.96309	7.52309	6.52309	7.04309	6.90309	7.37309	7.05309	7.43309	6.64309	6.75309		9.84099	8.69099	8.61099	7.85099	8.21099	8.77099	7.77099	8.29099	8.15099	8.62099	8.30099	8.68099	7.89099	8.00099	117.684		0.0241189	0.0213004
																																														408.019
较上一年财政性经费增长率X20 2019	8.962	7.993	5.179	21.171	19.651	25.205	-5.785	3.191	8.037	14.314	15.56	7.528	-3.446	11.949			9.09263	8.12363	5.30963	21.3016	19.7816	25.3356	-5.65437	3.32163	8.16763	14.4446	15.6906	7.65863	-3.31537	12.0796		23.787	22.818	20.004	35.996	34.476	40.03	9.04003	18.016	22.862	29.139	30.385	22.353	11.379	26.774	347.059		0.0139394	0.0133715
较上一年每万名学生所享受的财政性经费增长率X21 2019	0.758	1.462	0.781	4.65	6.854	14.888	-0.46	0.376	0.695	2.413	4.257	1.187	-1.015	3.984			0.888631	1.59263	0.911631	4.78063	6.98463	15.0186	-0.329369	0.506631	0.825631	2.54363	4.38763	1.31763	-0.884369	4.11463		15.583	16.287	15.606	19.475	21.679	29.713	14.365	15.201	15.52	17.238	19.082	16.012	13.81	18.809	248.38		0.00913178	0.00954433
平均每十万人公共图书收藏量X22 2019	4.014	5.336	3.084	3.295	4.245	9.913	2.107	2.347	2.719	5.283	3.631	3.057	4.615	3.519			4.14463	5.46663	3.21463	3.42563	4.37563	10.0436	2.23763	2.47763	2.84963	5.41363	3.76163	3.18763	4.74563	3.64963		18.839	20.161	17.909	18.12	19.07	24.738	16.932	17.172	17.544	20.108	18.456	17.882	19.44	18.344	264.715		0.0110398	0.0118145
人均城市道路面积X23 2019	14.32	17.15	17.1	19.6	24.97	36.04	38.5	33.23	16	28.76	32.93	23.99	25.15	21.37			14.4506	17.2806	17.2306	19.7306	25.1006	36.1706	38.6306	33.3606	16.1306	28.8906	33.0606	24.1206	25.2806	21.5006		29.145	31.975	31.925	34.425	39.795	50.865	53.325	48.055	30.825	43.585	47.755	38.815	39.975	36.195	556.66		0.0170792	0.0187376
平均每千人拥有卫生技术人员人数X24 2019	9.543	8.93	6.54	5.78	6.452	6.257	4.881	4.026	4.093	5.749	4.888	5.338	4.669	4.95			9.67363	9.06063	6.67063	5.91063	6.58263	6.38763	5.01163	4.15663	4.22363	5.87963	5.01863	5.46863	4.79963	5.08063		24.368	23.755	21.365	20.605	21.277	21.082	19.706	18.851	18.918	20.574	19.713	20.163	19.494	19.775	289.646		0.0142799	0.0139206
																																														1706.46
[truncated: 45 more columns]

## Sheet: 2020
	南宁市 Nanning	柳州市 Liuzhou	桂林市 Guilin	梧州市 Wuzhou	北海市 Beihai	防城港市 Fangcheng- gang	钦州市 Qinzhou	贵港市 Guigang	玉林市 Yulin	百色市 Baise	贺州市 Hezhou	河池市 Hechi	来宾市 Laibin	崇左市 Chongzuo		01数据的标准化处理	南宁市 Nanning	柳州市 Liuzhou	桂林市 Guilin	梧州市 Wuzhou	北海市 Beihai	防城港市 Fangcheng- gang	钦州市 Qinzhou	贵港市 Guigang	玉林市 Yulin	百色市 Baise	贺州市 Hezhou	河池市 Hechi	来宾市 Laibin	崇左市 Chongzuo	根据数据的实际情况实现平移，一般加0.0001。如果出现负数，则在最小值的绝对值基础上加0.0001作为平移量	南宁市 Nanning	柳州市 Liuzhou	桂林市 Guilin	梧州市 Wuzhou	北海市 Beihai	防城港市 Fangcheng- gang	钦州市 Qinzhou	贵港市 Guigang	玉林市 Yulin	百色市 Baise	贺州市 Hezhou	河池市 Hechi	来宾市 Laibin	崇左市 Chongzuo		p值	南宁市 Nanning	柳州市 Liuzhou
教育财政性经费X12020	14.976	8.52	7.659	5.286	3.716	2.06	5.419	7.347	9.589	8.344	3.921	6.989	3.688	3.755			14.9529	8.49691	7.63591	5.26291	3.69291	2.03691	5.39591	7.32391	9.56591	8.32091	3.89791	6.96591	3.66491	3.73191		14.953	8.49701	7.63601	5.26301	3.69301	2.03701	5.39601	7.32401	9.56601	8.32101	3.89801	6.96601	3.66501	3.73201	90.9471	计算 第j项指标下i城市指标值的比重：	0.0478868	0.0272115
地区生产总值X22020	4.726	3.051	2.138	1.088	1.265	0.733	1.387	1.359	1.769	1.338	0.75	0.946	0.723	0.832			4.70291	3.02791	2.11491	1.06491	1.24191	0.709909	1.36391	1.33591	1.74591	1.31491	0.726909	0.922909	0.699909	0.808909		4.70301	3.02801	2.11501	1.06501	1.24201	0.710009	1.36401	1.33601	1.74601	1.31501	0.727009	0.923009	0.700009	0.809009	21.7831		0.0150613	0.00969715
人均生产总值X3 2020	5.9723	7.7269	3.9468	3.0698	6.9662	7.236	3.32	2.3985	2.3867	3.1639	3.0131	2.1804	2.6824	3.2996			5.94921	7.70381	3.92371	3.04671	6.94311	7.21291	3.29691	2.37541	2.36361	3.14081	2.99001	2.15731	2.65931	3.27651		5.94931	7.70391	3.92381	3.04681	6.94321	7.21301	3.29701	2.37551	2.36371	3.14091	2.99011	2.15741	2.65941	3.27661	57.0407		0.0190526	0.0246717
城镇居民人均可支配收入X4 2020	3.854	3.848	3.815	3.459	3.796	3.719	3.713	3.4	3.736	3.396	3.408	3.088	3.617	3.456			3.83091	3.82491	3.79191	3.43591	3.77291	3.69591	3.68991	3.37691	3.71291	3.37291	3.38491	3.06491	3.59391	3.43291		3.83101	3.82501	3.79201	3.43601	3.77301	3.69601	3.69001	3.37701	3.71301	3.37301	3.38501	3.06501	3.59401	3.43301	49.9831		0.0122687	0.0122495
城镇居民人均生活消费性支出X5 2020	1.924	2.325	2.151	2.287	2.233	2.407	2.054	2.029	2.095	1.93	1.799	1.904	1.953	1.976			1.90091	2.30191	2.12791	2.26391	2.20991	2.38391	2.03091	2.00591	2.07191	1.90691	1.77591	1.88091	1.92991	1.95291		1.90101	2.30201	2.12801	2.26401	2.21001	2.38401	2.03101	2.00601	2.07201	1.90701	1.77601	1.88101	1.93001	1.95301	28.7451		0.00608795	0.00737215
公共财政预算收入X6 2020	3.723	1.731	1.115	0.76	0.794	0.537	0.65	0.753	1.018	0.945	0.409	0.508	0.394	0.338			3.69991	1.70791	1.09191	0.736909	0.770909	0.513909	0.626909	0.729909	0.994909	0.921909	0.385909	0.484909	0.370909	0.314909		3.70001	1.70801	1.09201	0.737009	0.771009	0.514009	0.627009	0.730009	0.995009	0.922009	0.386009	0.485009	0.371009	0.315009	13.3531		0.0118492	0.00546987
公共财政预算支出X7 2020	8.228	4.696	4.721	2.881	2.127	1.552	2.376	3.065	4.232	5.048	2.304	4.52	2.219	2.758			8.20491	4.67291	4.69791	2.85791	2.10391	1.52891	2.35291	3.04191	4.20891	5.02491	2.28091	4.49691	2.19591	2.73491		8.20501	4.67301	4.69801	2.85801	2.10401	1.52901	2.35301	3.04201	4.20901	5.02501	2.28101	4.49701	2.19601	2.73501	50.4051		0.0262764	0.0149652
																																														312.258
人口数X8 2020	7.914	3.949	5.417	3.545	1.816	1.013	4.179	5.665	7.412	4.23	2.489	4.338	2.694	2.522			0.321302	0.608683	0.502283	0.637965	0.763282	0.821483	0.592013	0.484308	0.357686	0.588316	0.714503	0.580489	0.699645	0.712111		0.321402	0.608783	0.502383	0.638065	0.763382	0.821583	0.592113	0.484408	0.357786	0.588416	0.714603	0.580589	0.699745	0.712211	8.38547		0.00920284	0.0174316
口自然变动X9 2020	12.03	3.48	2.07	3.51	7.94	8.97	0.53	3.47	5.67	0.71	5.09	0.07	-1.45	-0.59			0.022976	0.642676	0.744872	0.640502	0.319417	0.244763	0.856491	0.643401	0.483946	0.843444	0.525984	0.889831	1	0.937668		0.023076	0.642776	0.744972	0.640602	0.319517	0.244863	0.856591	0.643501	0.484046	0.843544	0.526084	0.889931	1.0001	0.937768	8.79737		0.000660745	0.0184049
总户数X10 2020	2.425	1.165	1.667	1.001	0.46	0.259	0.997	1.59	2.119	1.1	0.658	1.253	0.792	0.71			0.719142	0.810466	0.774081	0.822353	0.861564	0.876132	0.822643	0.779662	0.741321	0.815177	0.847213	0.804088	0.837501	0.843444		0.719242	0.810566	0.774181	0.822453	0.861664	0.876232	0.822743	0.779762	0.741421	0.815277	0.847313	0.804188	0.837601	0.843544	11.3562		0.0205944	0.0232093
在校学生数X11 2020	12.347	5.617	6.84	5.384	2.904	1.759	6.635	8.66	11.943	5.983	3.787	6.39	3.458	3.074			0	0.487787	0.399145	0.504675	0.684424	0.767413	0.414003	0.267232	0.0292817	0.46126	0.620425	0.431761	0.64427	0.672103		0.0001	0.487887	0.399245	0.504775	0.684524	0.767513	0.414103	0.267332	0.0293817	0.46136	0.620525	0.431861	0.64437	0.672203	6.38518		2.86334e-06	0.0139699
																																														34.9242
每百万人口在学人数X12 2020	15.602	14.224	12.626	15.186	15.988	17.369	15.878	15.286	16.114	14.145	15.218	14.729	12.836	12.19			15.4721	14.0941	12.4961	15.0561	15.8581	17.2391	15.7481	15.1561	15.9841	14.0151	15.0881	14.5991	12.7061	12.0601		15.4722	14.0942	12.4962	15.0562	15.8582	17.2392	15.7482	15.1562	15.9842	14.0152	15.0882	14.5992	12.7062	12.0602	205.574		0.0106003	0.00965619
每十万人口拥有的学校数量X13 2020	18.04	12.86	14.1	18.28	23.29	55.89	27.11	18.11	21.26	13.64	17.32	20.54	11.25	13.36			17.9101	12.7301	13.9701	18.1501	23.1601	55.7601	26.9801	17.9801	21.1301	13.5101	17.1901	20.4101	11.1201	13.2301		17.9102	12.7302	13.9702	18.1502	23.1602	55.7602	26.9802	17.9802	21.1302	13.5102	17.1902	20.4102	11.1202	13.2302	283.233		0.0122706	0.00872169
生均财政性经费X14 2020	12.13	15.17	11.2	9.82	12.8	11.71	8.17	8.48	8.03	13.95	10.35	10.94	10.67	12.22			12.0001	15.0401	11.0701	9.69009	12.6701	11.5801	8.04009	8.35009	7.90009	13.8201	10.2201	10.8101	10.5401	12.0901		12.0002	15.0402	11.0702	9.69019	12.6702	11.5802	8.04019	8.35019	7.90019	13.8202	10.2202	10.8102	10.5402	12.0902	153.823		0.00822155	0.0103043
教师与学生比X15 2020	60.79	61.94	64.19	63.58	60.99	61.97	56.2	56.62	54.84	69.84	59.8	26.91	59.07	62.05			60.6601	61.8101	64.0601	63.4501	60.8601	61.8401	56.0701	56.4901	54.7101	69.7101	59.6701	26.7801	58.9401	61.9201		60.6602	61.8102	64.0602	63.4502	60.8602	61.8402	56.0702	56.4902	54.7102	69.7102	59.6702	26.7802	58.9402	61.9202	816.973		0.0415594	0.0423473
																																														1459.6
GDP增长率X16 2020	3.7	1.1	2.3	8.2	-1.3	5.3	2.5	7	3.1	6.3	6.8	5.2	6.4	6.4			3.75628	1.15628	2.35628	8.25628	-1.24372	5.35628	2.55628	7.05628	3.15628	6.35628	6.85628	5.25628	6.45628	6.45628		5.00418	2.40418	3.60418	9.50418	0.00417706	6.60418	3.80418	8.30418	4.40418	7.60418	8.10418	6.50418	7.70418	7.70418	81.2585		0.0128203	0.00615931
城市化率X17 2020	7.621	7.373	4.792	4.505	5.399	6.364	3.324	3.814	3.896	3.673	3.98	3.541	3.742	3.644			7.67728	7.42928	4.84828	4.56128	5.45528	6.42028	3.38028	3.87028	3.95228	3.72928	4.03628	3.59728	3.79828	3.70028		8.92518	8.67718	6.09618	5.80918	6.70318	7.66818	4.62818	5.11818	5.20018	4.97718	5.28418	4.84518	5.04618	4.94818	83.9265		0.0228656	0.0222303
社会消费品零售总额X18 2020	21.8	12.7	8.89	2.84	3.14	1.29	4.03	4.11	7.53	3.8	1.82	2.78	1.3	2.27			21.8563	12.7563	8.94628	2.89628	3.19628	1.34628	4.08628	4.16628	7.58628	3.85628	1.87628	2.83628	1.35628	2.32628		23.1042	14.0042	10.1942	4.14418	4.44418	2.59418	5.33418	5.41418	8.83418	5.10418	3.12418	4.08418	2.60418	3.57418	96.5585		0.0591911	0.0358776
城镇单位从业人员年平均工资X19 2020	9.22	8.42	7.83	7.28	7.52	8.7	7.28	7.51	7.34	8.22	7.91	8.11	7.44	7.55			9.27628	8.47628	7.88628	7.33628	7.57628	8.75628	7.33628	7.56628	7.39628	8.27628	7.96628	8.16628	7.49628	7.60628		10.5242	9.72418	9.13418	8.58418	8.82418	10.0042	8.58418	8.81418	8.64418	9.52418	9.21418	9.41418	8.74418	8.85418	128.588		0.0269621	0.0249126
																																														390.332
较上一年财政性经费增长率X20 2020	6.092	7.617	0.026	-8.102	0.378	3.674	7.328	14.743	1.902	3.038	0.564	7.062	16.488	-0.793			6.26702	7.79202	0.201019	-7.92698	0.553019	3.84902	7.50302	14.918	2.07702	3.21302	0.739019	7.23702	16.663	-0.617981		20.9614	22.4864	14.8954	6.76742	15.2474	18.5434	22.1974	29.6124	16.7714	17.9074	15.4334	21.9314	31.3574	14.0764	268.189		0.0127925	0.0137232
较上一年每万名学生所享受的财政性经费增长率X21 2020	0.493	1.356	0.004	-1.505	0.13	2.089	1.104	1.702	0.159	0.508	0.149	1.105	4.768	-0.258			0.668019	1.53102	0.179019	-1.32998	0.305019	2.26402	1.27902	1.87702	0.334019	0.683019	0.324019	1.28002	4.94302	-0.0829806		15.3624	16.2254	14.8734	13.3644	14.9994	16.9584	15.9734	16.5714	15.0284	15.3774	15.0184	15.9744	19.6374	14.6114	219.976		0.00937548	0.00990216
平均每十万人公共图书收藏量X22 2020	4.108	5.323	3.251	3.325	4.547	10.23	2.13	2.445	2.794	5.376	3.685	3.096	4.759	3.617			4.28302	5.49802	3.42602	3.50002	4.72202	10.405	2.30502	2.62002	2.96902	5.55102	3.86002	3.27102	4.93402	3.79202		18.9774	20.1924	18.1204	18.1944	19.4164	25.0994	16.9994	17.3144	17.6634	20.2454	18.5544	17.9654	19.6284	18.4864	266.858		0.0115817	0.0123232
人均城市道路面积X23 2020	20.44	22.81	20.47	26.43	30.77	35.16	38.19	32.09	17.48	27.69	34.01	24.19	25.59	22.94			20.615	22.985	20.645	26.605	30.945	35.335	38.365	32.265	17.655	27.865	34.185	24.365	25.765	23.115		35.3094	37.6794	35.3394	41.2994	45.6394	50.0294	53.0594	46.9594	32.3494	42.5594	48.8794	39.0594	40.4594	37.8094	586.432		0.0215489	0.0229953
平均每千人拥有卫生技术人员人数X24 2020	10.127	9.37	7.488	6.088	7.241	6.537	5.272	4.431	4.645	6.09	5.488	5.802	5.056	5.312			10.302	9.54502	7.66302	6.26302	7.41602	6.71202	5.44702	4.60602	4.82002	6.26502	5.66302	5.97702	5.23102	5.48702		24.9964	24.2394	22.3574	20.9574	22.1104	21.4064	20.1414	19.3004	19.5144	20.9594	20.3574	20.6714	19.9254	20.1814	297.119		0.015255	0.014793
																																														1638.57
[truncated: 45 more columns]

## Sheet: 2021
	南宁市 Nanning	柳州市 Liuzhou	桂林市 Guilin	梧州市 Wuzhou	北海市 Beihai	防城港市 Fangcheng- gang	钦州市 Qinzhou	贵港市 Guigang	玉林市 Yulin	百色市 Baise	贺州市 Hezhou	河池市 Hechi	来宾市 Laibin	崇左市 Chongzuo		01数据的标准化处理	南宁市 Nanning	柳州市 Liuzhou	桂林市 Guilin	梧州市 Wuzhou	北海市 Beihai	防城港市 Fangcheng- gang	钦州市 Qinzhou	贵港市 Guigang	玉林市 Yulin	百色市 Baise	贺州市 Hezhou	河池市 Hechi	来宾市 Laibin	崇左市 Chongzuo	根据数据的实际情况实现平移，一般加0.0001。如果出现负数，则在最小值的绝对值基础上加0.0001作为平移量	南宁市 Nanning	柳州市 Liuzhou	桂林市 Guilin	梧州市 Wuzhou	北海市 Beihai	防城港市 Fangcheng- gang	钦州市 Qinzhou	贵港市 Guigang	玉林市 Yulin	百色市 Baise	贺州市 Hezhou	河池市 Hechi	来宾市 Laibin	崇左市 Chongzuo		p值	南宁市 Nanning	柳州市 Liuzhou
教育财政性经费X1 2021	15.412	8.559	7.979	5.298	3.711	2.138	5.478	6.979	9.481	8.128	3.989	7.11	4.136	3.737		标准化后权重 和熵值是唯一的	15.3854	8.53242	7.95242	5.27142	3.68442	2.11142	5.45142	6.95242	9.45442	8.10142	3.96242	7.08342	4.10942	3.71042		15.3855	8.53252	7.95252	5.27152	3.68452	2.11152	5.45152	6.95252	9.45452	8.10152	3.96252	7.08352	4.10952	3.71052	91.7643	Wij值	0.0470015	0.0260661
地区生产总值X22021	5.121	3.057	2.314	1.369	1.593	0.937	1.648	1.502	2.095	1.569	0.925	1.06	0.886	1.005			5.09442	3.03042	2.28742	1.34242	1.56642	0.910423	1.62142	1.47542	2.06842	1.54242	0.898423	1.03342	0.859423	0.978423		5.09452	3.03052	2.28752	1.34252	1.56652	0.910523	1.62152	1.47552	2.06852	1.54252	0.898523	1.03352	0.859523	0.978523	24.7103		0.0155633	0.009258
人均生产总值X32021	6.3937	7.7049	4.2734	3.8608	8.717	9.1918	3.9284	2.6496	2.8203	3.7102	3.7099	2.4467	3.2983	3.9959			6.36712	7.67832	4.24682	3.83422	8.69042	9.16522	3.90182	2.62302	2.79372	3.68362	3.68332	2.42012	3.27172	3.96932		6.36722	7.67842	4.24692	3.83432	8.69052	9.16532	3.90192	2.62312	2.79382	3.68372	3.68342	2.42022	3.27182	3.96942	66.3302		0.0194513	0.0234569
城镇居民人均可支配收入X42021	4.139	4.144	4.074	3.719	4.073	3.968	4.017	3.676	4.031	3.638	3.667	3.335	3.871	3.695			4.11242	4.11742	4.04742	3.69242	4.04642	3.94142	3.99042	3.64942	4.00442	3.61142	3.64042	3.30842	3.84442	3.66842		4.11252	4.11752	4.04752	3.69252	4.04652	3.94152	3.99052	3.64952	4.00452	3.61152	3.64052	3.30852	3.84452	3.66852	53.6763		0.0125634	0.0125787
城镇居民人均生活消费性支出X52021	2.058	2.467	2.334	2.399	2.322	2.547	2.151	2.265	2.244	2.019	1.995	2.047	2.053	2.146			2.03142	2.44042	2.30742	2.37242	2.29542	2.52042	2.12442	2.23842	2.21742	1.99242	1.96842	2.02042	2.02642	2.11942		2.03152	2.44052	2.30752	2.37252	2.29552	2.52052	2.12452	2.23852	2.21752	1.99252	1.96852	2.02052	2.02652	2.11952	30.6763		0.00620613	0.00745559
公共财政预算收入X62021	3.918	1.75	1.175	0.789	0.721	0.509	0.723	0.857	0.796	1.03	0.484	0.564	0.468	0.399			3.89142	1.72342	1.14842	0.762423	0.694423	0.482423	0.696423	0.830423	0.769423	1.00342	0.457423	0.537423	0.441423	0.372423		3.89152	1.72352	1.14852	0.762523	0.694523	0.482523	0.696523	0.830523	0.769523	1.00352	0.457523	0.537523	0.441523	0.372523	13.8123		0.0118883	0.00526522
公共财政预算支出X7 2021	7.754	4.24	4.618	2.591	1.792	1.43	2.461	2.928	3.759	4.306	2.191	3.729	2.342	2.601			7.72742	4.21342	4.59142	2.56442	1.76542	1.40342	2.43442	2.90142	3.73242	4.27942	2.16442	3.70242	2.31542	2.57442		7.72752	4.21352	4.59152	2.56452	1.76552	1.40352	2.43452	2.90152	3.73252	4.27952	2.16452	3.70252	2.31552	2.57452	46.3713		0.0236069	0.012872
																																														327.341
人口数X82021	8.009	3.968	5.416	3.547	1.827	1.019	4.195	5.668	7.428	4.228	2.493	4.333	2.685	2.514			0.302215	0.551552	0.462208	0.577528	0.683655	0.73351	0.537546	0.446659	0.338064	0.535509	0.642562	0.529031	0.630715	0.641266		0.302315	0.551652	0.462308	0.577628	0.683755	0.73361	0.537646	0.446759	0.338164	0.535609	0.642662	0.529131	0.630815	0.641366	7.61342		0.00920221	0.0167918
人口自然变动X92021	12.08	4.81	-0.24	0.42	5.89	6.42	3.8	0.46	2.2	-0.4	1.89	-1.22	-3.3	-2.97			0.0510273	0.499599	0.811193	0.77047	0.432961	0.400259	0.561918	0.768001	0.66064	0.821065	0.679768	0.87166	1	0.979638		0.0511273	0.499699	0.811293	0.77057	0.433061	0.400359	0.562018	0.768101	0.66074	0.821165	0.679868	0.87176	1.0001	0.979738	9.3096		0.00155627	0.0152104
总户数X10 2021	2.616	1.177	1.684	1.014	0.471	0.26	1.009	1.628	2.173	1.1	0.668	1.255	0.799	0.714			0.634973	0.723761	0.692479	0.733819	0.767323	0.780342	0.734127	0.695934	0.662306	0.728512	0.755168	0.718949	0.747085	0.752329		0.635073	0.723861	0.692579	0.733919	0.767423	0.780442	0.734227	0.696034	0.662406	0.728612	0.755268	0.719049	0.747185	0.752429	10.1285		0.0193311	0.0220337
在校学生数X11 2021	12.907	5.767	7.052	5.526	2.941	1.789	6.824	8.771	12.289	5.963	3.896	6.382	3.483	3.115			0	0.44055	0.361264	0.45542	0.614919	0.686	0.375332	0.255198	0.0381317	0.428457	0.555994	0.402604	0.581477	0.604183		0.0001	0.44065	0.361364	0.45552	0.615019	0.6861	0.375432	0.255298	0.0382317	0.428557	0.556094	0.402704	0.581577	0.604283	5.80093		3.04391e-06	0.013413
																																														32.8525
每百万人口在学人数X12 2021	16.115	14.534	13.021	15.58	16.097	17.553	16.268	15.475	16.545	14.103	15.627	14.729	12.972	12.39			15.9809	14.3999	12.8869	15.4459	15.9629	17.4189	16.1339	15.3409	16.4109	13.9689	15.4929	14.5949	12.8379	12.2559		15.981	14.4	12.887	15.446	15.963	17.419	16.134	15.341	16.411	13.969	15.493	14.595	12.838	12.256	209.133		0.010898	0.00981987
每十万人口拥有的学校数量X13 2021	17.93	12.48	14.44	18.38	23.21	20.31	26.91	18.1	21.27	13.17	17.97	20.1	11.43	12.49			17.7959	12.3459	14.3059	18.2459	23.0759	20.1759	26.7759	17.9659	21.1359	13.0359	17.8359	19.9659	11.2959	12.3559		17.796	12.346	14.306	18.246	23.076	20.176	26.776	17.966	21.136	13.036	17.836	19.966	11.296	12.356	246.314		0.0121357	0.00841917
生均财政性经费X14 2021	11.94	14.84	11.31	9.59	12.62	11.95	8.03	7.96	7.72	13.63	10.24	11.14	11.87	12			11.8059	14.7059	11.1759	9.4559	12.4859	11.8159	7.8959	7.8259	7.5859	13.4959	10.1059	11.0059	11.7359	11.8659		11.806	14.706	11.176	9.456	12.486	11.816	7.896	7.826	7.586	13.496	10.106	11.006	11.736	11.866	152.964		0.00805093	0.0100285
教师与学生比X15 2021	61.86	62.82	65.29	62.78	60.86	63.46	57.1	58.72	55.73	63.82	60.31	60.68	62.29	64.16			61.7259	62.6859	65.1559	62.6459	60.7259	63.3259	56.9659	58.5859	55.5959	63.6859	60.1759	60.5459	62.1559	64.0259		61.726	62.686	65.156	62.646	60.726	63.326	56.966	58.586	55.596	63.686	60.176	60.546	62.156	64.026	858.004		0.0420931	0.0427478
																																														1466.42
GDP增长率X16 2021	6.1	2	6.8	10	9.7	11.4	10	6.5	10.3	9.8	14.4	8.1	11.3	10.5			6.03801	1.93801	6.73801	9.93801	9.63801	11.338	9.93801	6.43801	10.238	9.73801	14.338	8.03801	11.238	10.438	每个数据加上1.2479实现非负平移	7.28591	3.18591	7.98591	11.1859	10.8859	12.5859	11.1859	7.68591	11.4859	10.9859	15.5859	9.28591	12.4859	11.6859	143.503		0.0157512	0.00688754
城市化率X17 2021	7.696	7.401	4.878	4.429	6.034	6.484	3.38	3.872	3.946	3.765	4.037	3.624	3.8	3.724			7.63401	7.33901	4.81601	4.36701	5.97201	6.42201	3.31801	3.81001	3.88401	3.70301	3.97501	3.56201	3.73801	3.66201		8.88191	8.58691	6.06391	5.61491	7.21991	7.66991	4.56591	5.05791	5.13191	4.95091	5.22291	4.80991	4.98591	4.90991	83.6727		0.0192016	0.0185638
社会消费品零售总额X18 2021	23.64	13.32	9.43	3.16	3.5	1.38	4.7	4.58	8.41	4.21	2	3.09	1.44	2.52			23.578	13.258	9.36801	3.09801	3.43801	1.31801	4.63801	4.51801	8.34801	4.14801	1.93801	3.02801	1.37801	2.45801		24.8259	14.5059	10.6159	4.34591	4.68591	2.56591	5.88591	5.76591	9.59591	5.39591	3.18591	4.27591	2.62591	3.70591	101.983		0.0536706	0.03136
城镇单位从业人员年平均工资X19 2021	9.8	9.1	8.35	7.7	8.18	8.81	7.99	7.92	7.74	8.74	8.01	8.72	7.69	8.05			9.73801	9.03801	8.28801	7.63801	8.11801	8.74801	7.92801	7.85801	7.67801	8.67801	7.94801	8.65801	7.62801	7.98801		10.9859	10.2859	9.53591	8.88591	9.36591	9.99591	9.17591	9.10591	8.92591	9.92591	9.19591	9.90591	8.87591	9.23591	133.403		0.0237502	0.0222369
																																														462.561
较上一年财政性经费增长率X20 2021	2.911	0.458	4.178	0.227	-0.135	3.786	1.089	-5.009	-1.126	-2.589	1.734	1.731	12.148	-0.479			3.02746	0.574464	4.29446	0.343464	-0.018536	3.90246	1.20546	-4.89254	-1.00954	-2.47254	1.85046	1.84746	12.2645	-0.362536		17.7219	15.2689	18.9889	15.0379	14.6759	18.5969	15.8999	9.80186	13.6849	12.2219	16.5449	16.5419	26.9589	14.3319	226.276		0.0111063	0.00956902
较上一年每万名学生所享受的财政性经费增长率X21 2021	0.226	0.079	0.592	0.041	-0.046	2.116	0.16	-0.571	-0.092	-0.434	0.445	0.271	3.488	-0.154			0.342464	0.195464	0.708464	0.157464	0.070464	2.23246	0.276464	-0.454536	0.024464	-0.317536	0.561464	0.387464	3.60446	-0.037536		15.0369	14.8899	15.4029	14.8519	14.7649	16.9269	14.9709	14.2399	14.7189	14.3769	15.2559	15.0819	18.2989	14.6569	213.473		0.00942363	0.0093315
平均每十万人公共图书收藏量X22 2021	4.285	5.66	3.346	3.409	4.559	10.243	1.979	2.586	2.884	5.53	3.854	3.159	4.931	3.806			4.40146	5.77646	3.46246	3.52546	4.67546	10.3595	2.09546	2.70246	3.00046	5.64646	3.97046	3.27546	5.04746	3.92246		19.0959	20.4709	18.1569	18.2199	19.3699	25.0539	16.7899	17.3969	17.6949	20.3409	18.6649	17.9699	19.7419	18.6169	267.583		0.0119674	0.0128291
人均城市道路面积X23 2021	20.3	23.5	20.8	27.3	25.9	35.6	38	32.4	17.6	28	34.8	23.9	25.9	26.4			20.4165	23.6165	20.9165	27.4165	26.0165	35.7165	38.1165	32.5165	17.7165	28.1165	34.9165	24.0165	26.0165	26.5165		35.1109	38.3109	35.6109	42.1109	40.7109	50.4109	52.8109	47.2109	32.4109	42.8109	49.6109	38.7109	40.7109	41.2109	587.752		0.022004	0.0240095
平均每千人拥有卫生技术人员人数X24 2021	10.67	9.907	7.853	6.298	7.382	6.807	5.495	4.677	5.056	6.839	5.244	6.084	5.408	5.499			10.7865	10.0235	7.96946	6.41446	7.49846	6.92346	5.61146	4.79346	5.17246	6.95546	5.36046	6.20046	5.52446	5.61546		25.4809	24.7179	22.6639	21.1089	22.1929	21.6179	20.3059	19.4879	19.8669	21.6499	20.0549	20.8949	20.2189	20.3099	300.571		0.0159689	0.0154907
																																														1595.66
[truncated: 46 more columns]

[truncated: 9 more sheets: 2022, 雷达图生成, 所有的数据 (2), 雷达图生产02, 计算全距系数等, 多元线性回归, 回归需要的数据, 承载力增长率组合图, Sheet1]
